# Supplementary material for: Analysis of Soil Hydraulic and Thermal Properties for LandSurface Modelling over the Tibetan Plateau
Source: Copernicus journal article supplement (doi:10.5194/essd-2017-122), 2018-01-03
Supplement: Supplementary file [file essd-2017-122-AC2-supplement.zip]

## Supplement

Table S1 Information of the exiting soil datasets

| Name         | Soil property                                  | Spatial resolution | Profile information                                                                                                              | Data source                                                                                                       | Reference                                                                                                                          | Released Date |
|--------------|------------------------------------------------|--------------------|----------------------------------------------------------------------------------------------------------------------------------|-------------------------------------------------------------------------------------------------------------------|------------------------------------------------------------------------------------------------------------------------------------|---------------|
| FAO-UNESCO   | Soil texture fractions, SOC                    | 5km                | 2 layers<br>0-30cm,<br>30-100cm                                                                                                  | 1:5 million soil map of world<br>1:1 million soil map of China;<br>1:5 million soil map of world;                 | FAO-UNESCO Digital Soil Map of the World, 2007                                                                                     | 2007          |
| HWSD         | Soil texture fractions, SOC                    | 1km                | 2 layers<br>0-30cm,<br>30-100cm                                                                                                  | 7292 profiles in China                                                                                            | FAO/IIASA/ISRIC/ISSCAS/JRC, 2012. Harmonized World Soil Database (version 1.2).<br>FAO, Rome, Italy and IIASA, Laxenburg, Austria. | 2012          |
| BNU          | Soil texture fractions, SOC, BD, GGF, Porosity | 1km                | 8 layers<br>0-4.5cm,<br>4.5-9.1cm<br>9.1-16.6cm,<br>16.6-28.9cm<br>28.9-49.3cm,<br>49.3-82.9cm<br>82.9-138.3cm,<br>138.3-229.6cm | 1:1 million soil map of China;<br>8979 profiles in China<br>Chinese soil profile database (Shangguan et al. 2013) | Shangguan et al. (2012, 2013)                                                                                                      | 2012          |
| SoilGrid1km  | Soil texture fractions, SOC, BD, GGF           | 1km                | 7 layer<br>0, 5, 15, 30, 60, 100 and 200cm.                                                                                      | Covariates: MODIS images, SRTM DEM etc.<br>Chinese soil profile database (Shangguan et al. 2013)                  | Hengl et al. (2014)                                                                                                                | 2014          |
| SoilGrid250m | Soil texture fractions, SOC, BD, GGF           | 250m               | 7 layer<br>0, 5, 15, 30, 60, 100 and 200cm.                                                                                      | Covariates: MODIS images,                                                                                         | Hengl et al. (2017)                                                                                                                | 2017          |

SRTM  
DEM etc.

|      |                                                  |      |                                                      |                 |                       |      |
|------|--------------------------------------------------|------|------------------------------------------------------|-----------------|-----------------------|------|
| HPSS | Parameters in the van Genuchten and Mualem model | 25km | 7 layer<br>0, 5, 15,<br>30, 60,<br>100 and<br>200cm. | SoilGrid1k<br>m | Montzka et al. (2017) | 2017 |
|------|--------------------------------------------------|------|------------------------------------------------------|-----------------|-----------------------|------|

Table S2 Means and standard deviations of soil properties at different depths in the Ngari area

| Parameter               | 5 cm         | 10 cm        | 20 cm        | 40 cm        |
|-------------------------|--------------|--------------|--------------|--------------|
| Sand (%)                | 84.54±8.28   | 86.19±8.63   | 77.21±17.55  | 78.81±17.93  |
| Clay (%)                | 3.05± 1.99   | 2.73± 2.03   | 3.83± 2.67   | 3.27± 2.71   |
| Silt (%)                | 12.42± 6.54  | 11.08± 6.93  | 18.96± 14.98 | 17.93± 15.41 |
| GGF (%)                 | 11.26± 10.76 | 11.77± 15.71 | 23.17± 25.05 | 18.75± 20.17 |
| SOC (%)                 | 1.02± 0.67   | 0.7± 0.49    | 0.73± 0.49   | 0.79± 0.67   |
| Porosity (%)            | 33.49± 2.78  | 35.8± 6.76   | 31.4± 7.2    | 33.8± 9.47   |
| GD (mm)                 | 5.02± 2.92   | 5.23± 2.47   | 7.56± 5.07   | 4.96± 1.7    |
| FD (mm)                 | 0.22± 0.1    | 0.2± 0.08    | 0.23± 0.19   | 0.19± 0.09   |
| BD (g/cm <sup>3</sup> ) | 1.56± 0.13   | 1.63± 0.26   | 1.6± 0.26    | 1.56± 0.18   |
| LogK <sub>s</sub> (m/s) |              | -4.57± 0.24  | -4.94± 0.47  | -4.68± 0.30  |

5 Table S3 Means and standard deviations of soil properties at different depths in the Naqu area

| Parameter               | 5 cm         | 10 cm        | 20 cm        | 40 cm        | 50 cm        |
|-------------------------|--------------|--------------|--------------|--------------|--------------|
| Sand (%)                | 78.79± 6.86  | 81.48± 13.49 | 75.13± 14.67 | 75.93± 10.64 | 70.15± 20.28 |
| Clay (%)                | 4.41± 1.63   | 4.02± 3.04   | 5.84± 3.87   | 6.43± 4.17   | 7.29± 6.39   |
| Silt (%)                | 16.8± 5.79   | 14.5± 10.46  | 19.03± 10.85 | 17.64± 7.09  | 22.56± 14.14 |
| GGF (%)                 | 12.69± 13.11 | 19.3± 15.91  | 34± 25.97    | 53.29± 24.05 | 57.43± 22.43 |
| SOC (%)                 | 9.18± 3.55   | 8.17± 3.95   | 2.25± 1.11   | 1.61± 0.93   | 2.68± 3.24   |
| Porosity (%)            | 58.5± 21.49  | 45.67± 6.81  | 39.75± 5.8   | 29.5± 6.61   | 24.5± 5.92   |
| GD (mm)                 | 4.55± 1.78   | 3.96± 1.2    | 7.28± 4.57   | 7.75± 4.99   | 6.18± 2.6    |
| FD (mm)                 | 0.19± 0.04   | 0.21± 0.07   | 0.19± 0.08   | 0.22± 0.05   | 0.19± 0.12   |
| BD (g/cm <sup>3</sup> ) | 1.01± 0.48   | 1.42± 0.08   | 1.64± 0.17   | 1.87± 0.21   | 2.11± 0.18   |
| LogK <sub>s</sub> (m/s) |              | -5.20± 0.25  | -5.09± 0.50  | -5.20± 0.77  | -6.12± 0.99  |

Table S4 Means and standard deviations of soil properties at different depths in the Maqu area

| Parameter    | 5 cm         | 10 cm        | 20 cm        | 40 cm        | 80 cm        |
|--------------|--------------|--------------|--------------|--------------|--------------|
| Sand (%)     | 26.95± 10.55 | 29.03± 13.08 | 29.21± 12.61 | 31.6± 12.47  | 34.83± 17.06 |
| Clay (%)     | 9.86± 0.89   | 9.95± 0.91   | 10.15± 0.61  | 10.43± 0.89  | 9.35± 2.68   |
| Silt (%)     | 63.19± 10.08 | 61.02± 12.52 | 60.65± 12.48 | 57.97± 12.18 | 55.82± 14.95 |
| SOC (%)      | 17.88± 9.05  | 12.16± 6.23  | 8.05± 5.05   | 4.13± 3.14   | 2.87± 2.89   |
| Porosity (%) | 72.92± 7.55  | 65.57± 7.57  | 59.21± 6.22  | 50.96± 7.5   | 47.06± 6.5   |

|                         |            |            |             |            |             |
|-------------------------|------------|------------|-------------|------------|-------------|
| FD (mm)                 | 0.03± 0.01 | 0.03± 0.01 | 0.03± 0.01  | 0.03± 0.01 | 0.04± 0.02  |
| BD (g/cm <sup>3</sup> ) | 0.76± 0.22 | 0.95± 0.25 | 1.23± 0.19  | 1.4± 0.12  | 1.49± 0.18  |
| LogK <sub>s</sub> (m/s) |            | -5.5± 0.32 | -5.55± 0.44 | -6.52± 0.3 | -5.65± 0.97 |

10 Table S5 Absolute bias of estimated SWRCs from PTFs combined without BD scheme, with the measurements at 5 cm under three climate zones.

| PTFs                        | Ngari (arid)                                      | Naqu (semi-arid)                                  | Maqu (sub-humid)                                  |  |
|-----------------------------|---------------------------------------------------|---------------------------------------------------|---------------------------------------------------|--|
|                             | Absolute Bias (cm <sup>3</sup> cm <sup>-3</sup> ) | Absolute Bias (cm <sup>3</sup> cm <sup>-3</sup> ) | Absolute Bias (cm <sup>3</sup> cm <sup>-3</sup> ) |  |
| Cosby et al., 1984          | 0.03                                              | 0.09                                              | 0.23                                              |  |
| Cosby et al., 1984          | 0.03                                              | 0.09                                              | 0.20                                              |  |
| Saxton et al., 1986         | 0.09                                              | 0.08                                              | 0.21                                              |  |
| Campbell and Shiosawa, 1992 | 0.06                                              | 0.11                                              | 0.17                                              |  |
| Saxton et al., 2006         | 0.05                                              | 0.07                                              | 0.07                                              |  |
| Rawls and Brakensiek 1985   | 0.06                                              | 0.16                                              | 0.30                                              |  |
| Wösten et al., (Class PTF)  | 0.05                                              | 0.05                                              | 0.36                                              |  |
| Vereecken et al., 1989      | 0.02                                              | 0.11                                              | 0.36                                              |  |
| Wösten et al., 1999         | 0.05                                              | 0.07                                              | 0.25                                              |  |
| Rosetta1-H3                 | 0.05                                              | 0.14                                              | 0.26                                              |  |
| Rosetta3-H3                 | 0.04                                              | 0.12                                              | 0.40                                              |  |
| Weynants et al. 2009        | 0.05                                              | 0.07                                              | 0.23                                              |  |

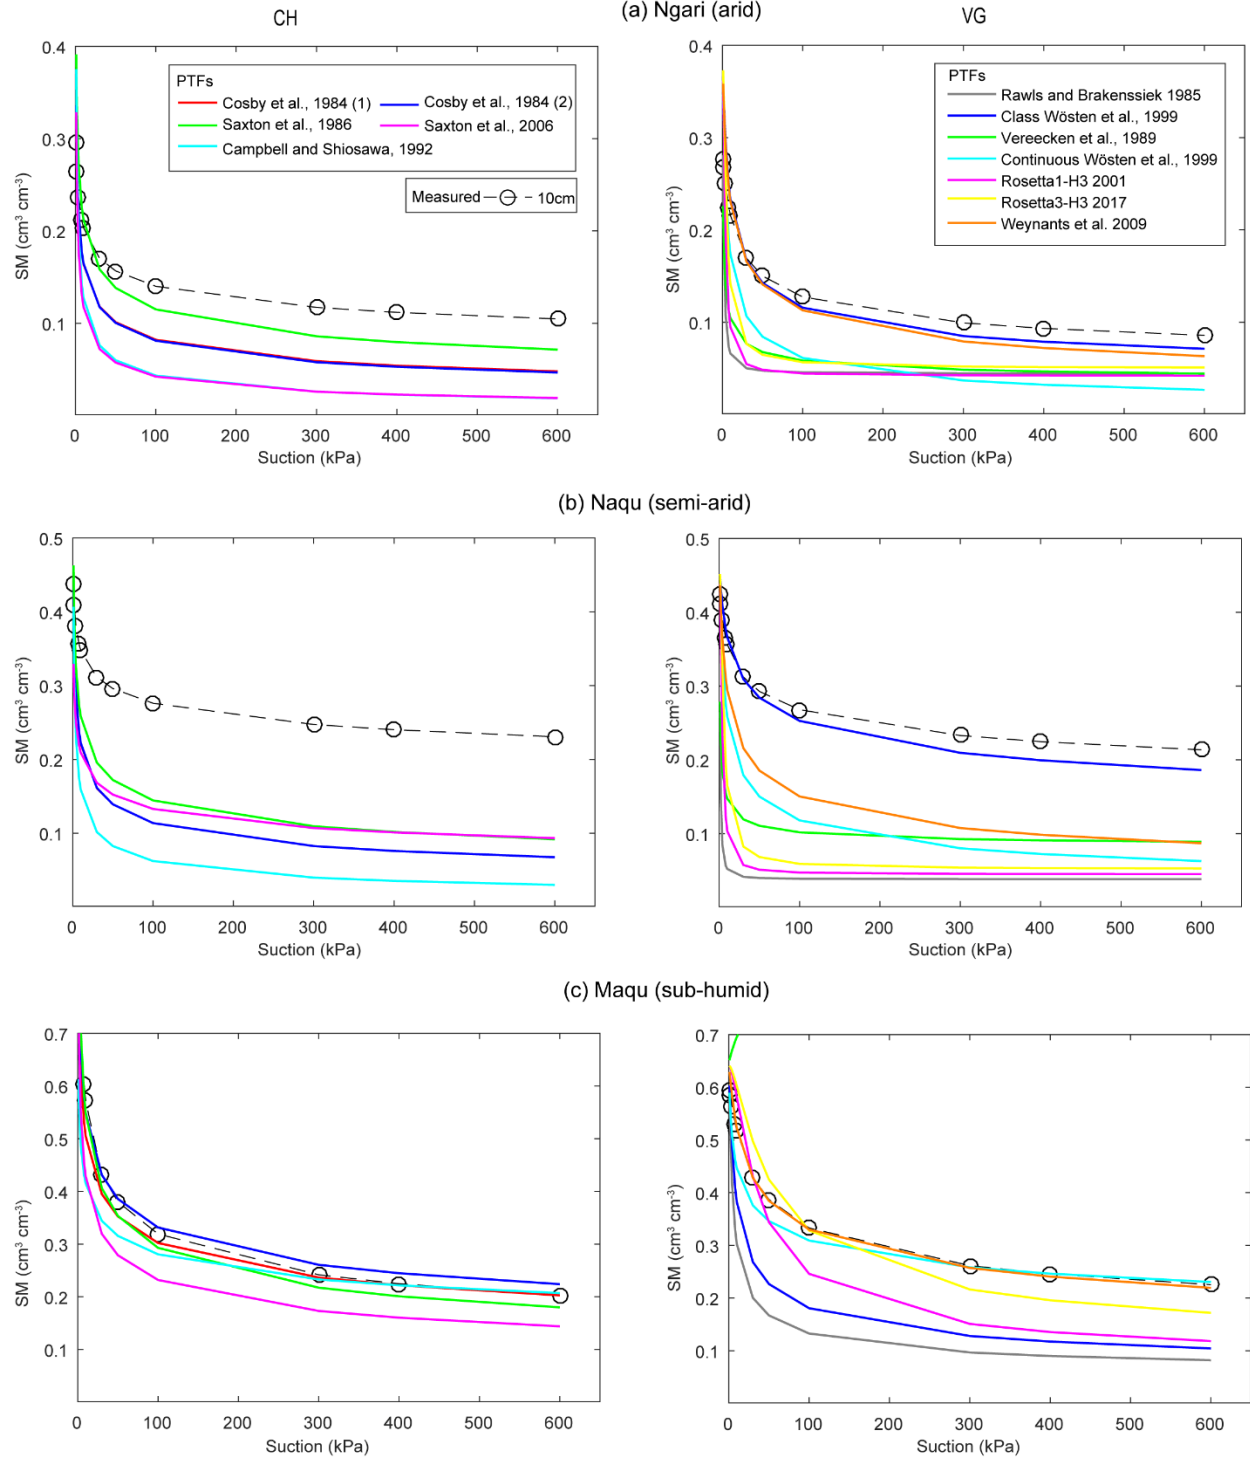

Figure S1-1 Comparisons between estimated SWRCs from PTFs combined with the BD scheme, and the measurement determined SWRCs at 10 cm for three climate zones. The broken green line in the right-hand figure of (c) denotes SM at > 100 kPa being above  $0.7 \text{ cm}^3 \text{cm}^{-3}$ .

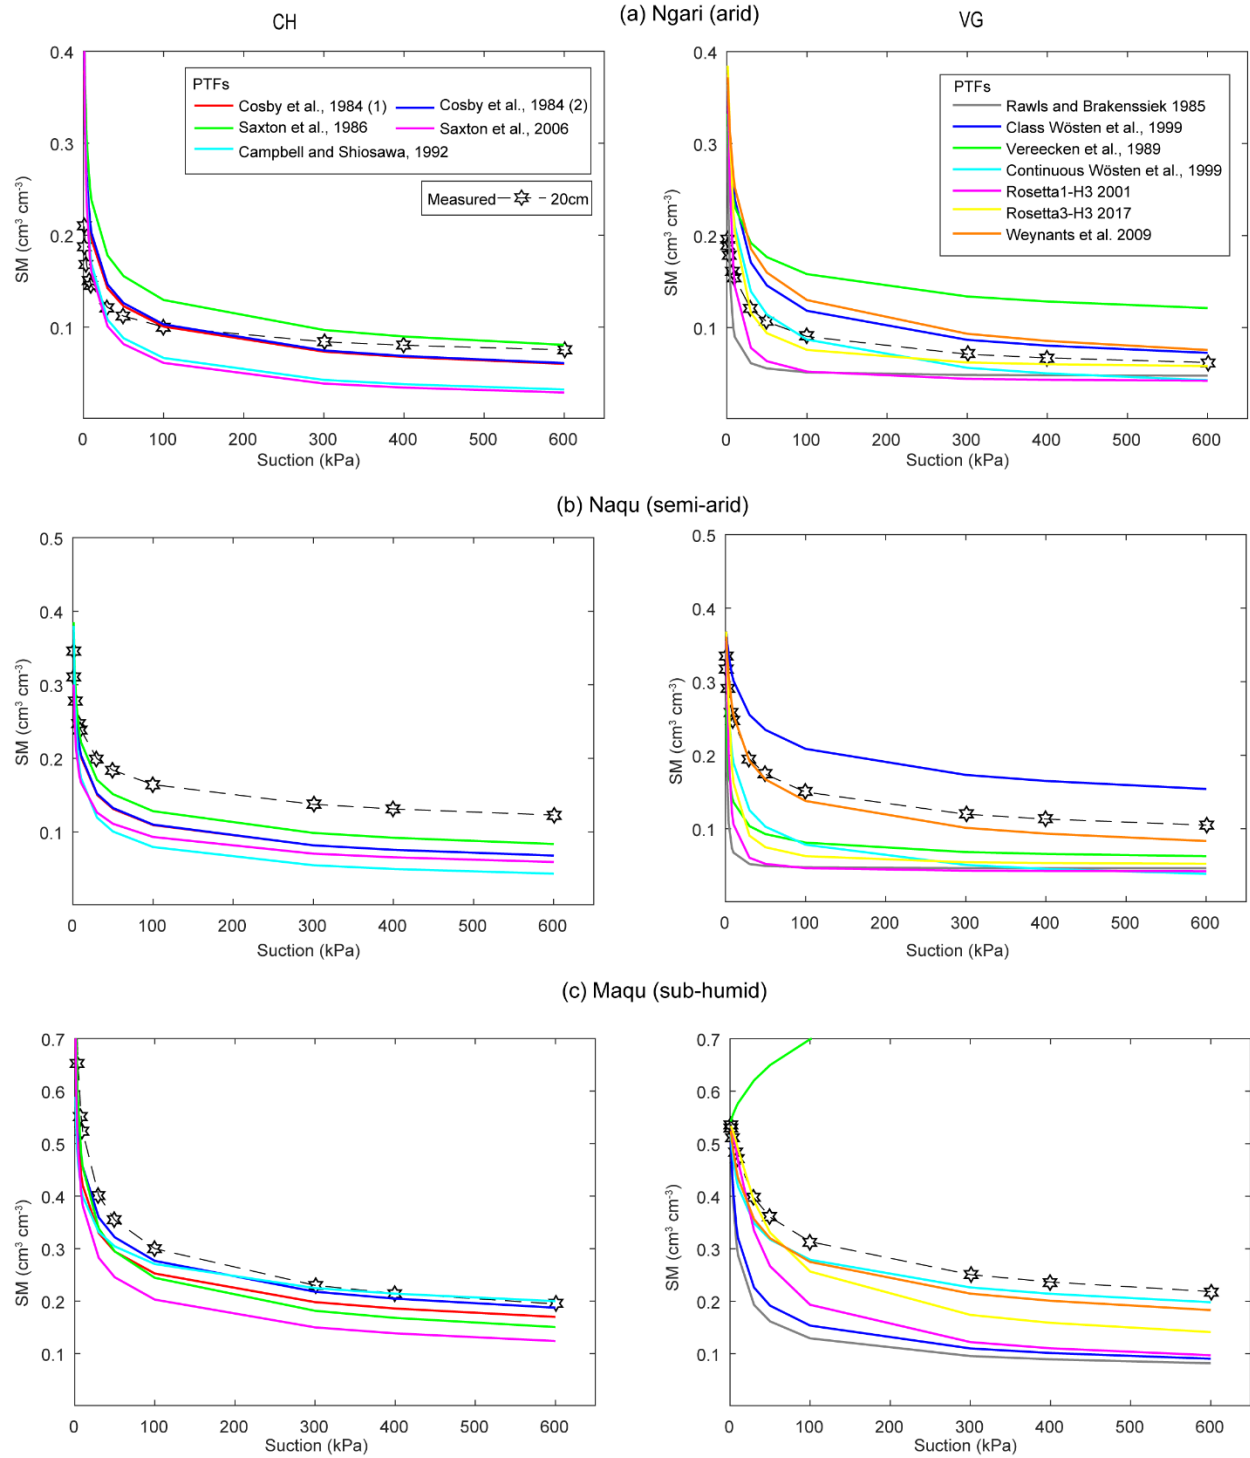

Figure S1-1 Comparisons between estimated SWRCs from PTFs combined with the BD scheme, and the measurement determined SWRCs at 20 cm for three climate zones. The broken green line in the right-hand figure of (c) denotes SM at  $> 100$  kPa being above  $0.7 \text{ cm}^3 \text{cm}^{-3}$ .

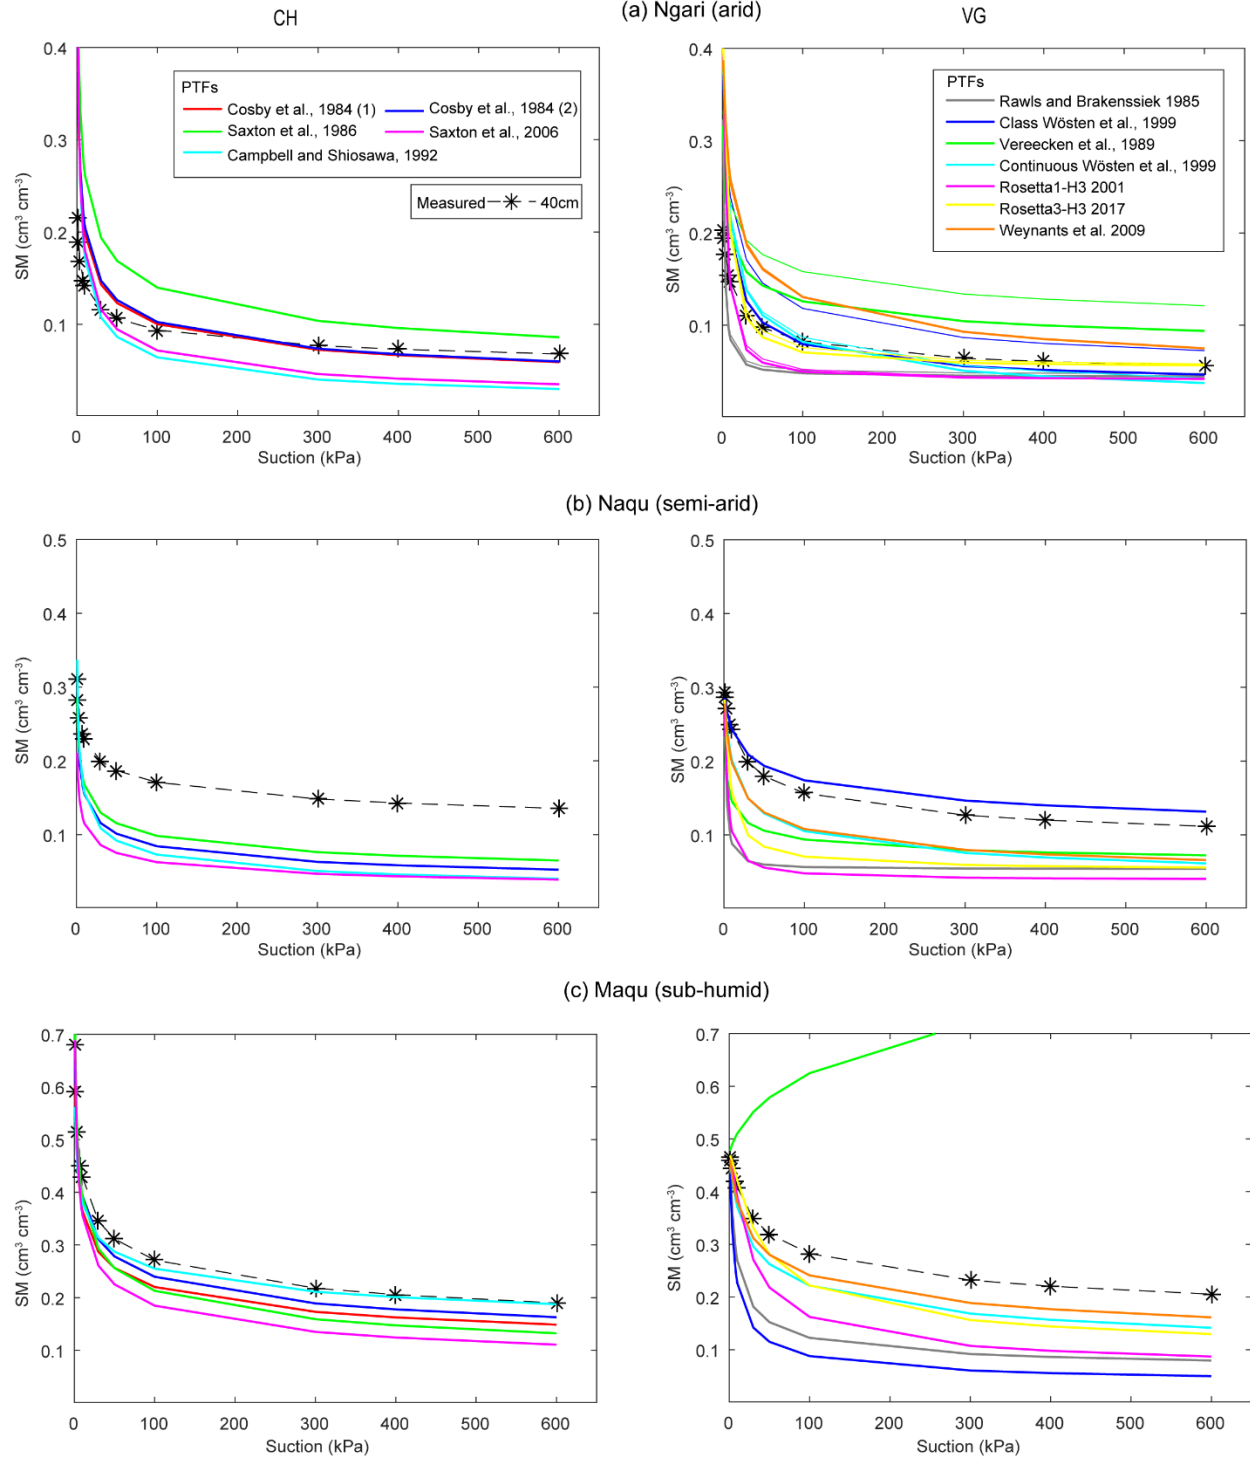

Figure S1-1 Comparisons between estimated SWRCs from PTFs combined with the BD scheme, and the measurement determined SWRCs at 40 cm for three climate zones. The broken green line in the right-hand figure of (c) denotes SM at > 100 kPa being above 0.7 cm³ cm⁻³.

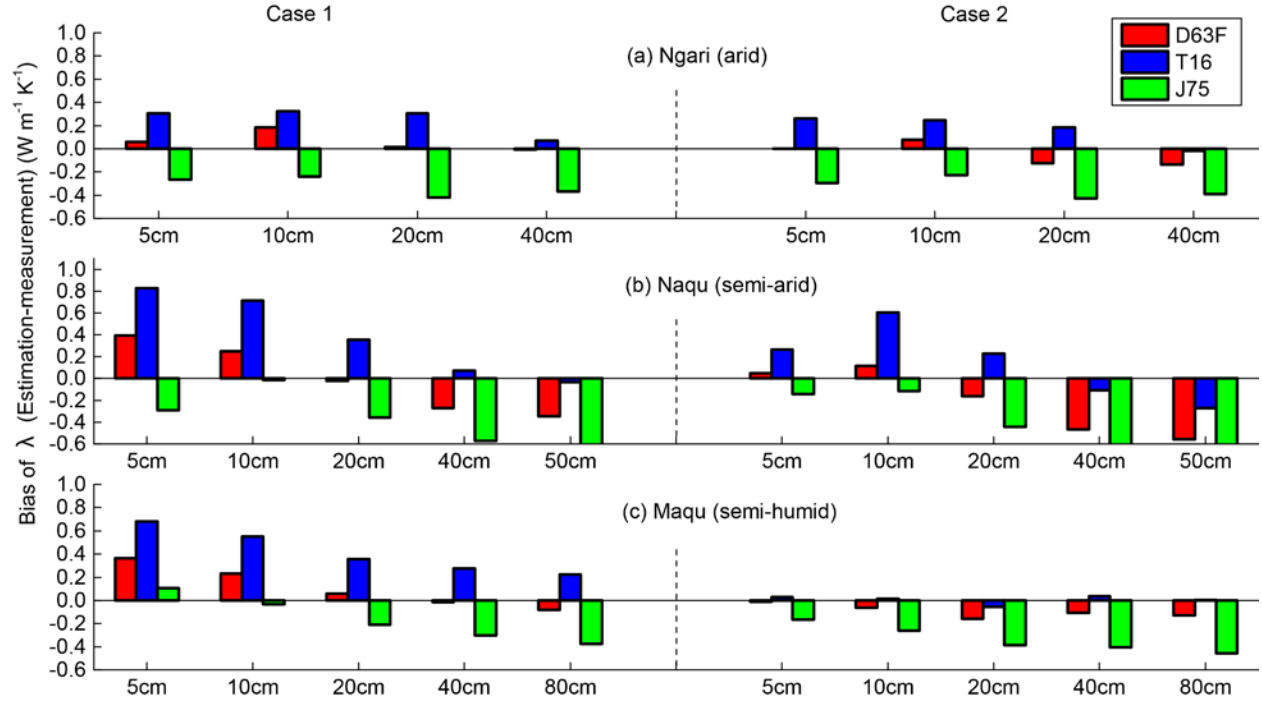

Figure S2 Biases of  $\lambda$  estimates based on D63F, T16 and J75 schemes combined with the Cosby-S scheme (Cosby PTFs) in the profile over the three climate zones with the measurements. Case 1 is the bias derived from schemes not considering gravel impact parameterization for the arid and semi-arid zone and SOC impact parameterization for the semi-humid zone. Case 2 is the bias with these parameterizations consideration.

List of Abbreviations:

|    |              |                                                                                                                           |
|----|--------------|---------------------------------------------------------------------------------------------------------------------------|
| 35 | SHP/STP      | Soil hydraulic and thermal properties                                                                                     |
|    | LSM          | Land surface model                                                                                                        |
|    | TP           | the Tibetan Plateau                                                                                                       |
|    | SWRC         | Soil Water Retention Curve                                                                                                |
|    | $K_s$        | Saturated hydraulic conductivity                                                                                          |
| 40 | $\lambda$    | Thermal conductivity                                                                                                      |
|    | SM           | Soil Moisture                                                                                                             |
|    | ST           | Soil temperature                                                                                                          |
|    | Tibet-Obs    | The Tibetan Plateau Observatory of plateau scale soil moisture and soil temperature                                       |
|    | the CH model | The Clapp and Hornberger (1978) formulation                                                                               |
| 45 | the VG model | The Van Genuchten (1980) formulation                                                                                      |
|    | PTFs         | Pedotransfer functions                                                                                                    |
|    | H-TESSSEL    | The Hydrology-Tiled European Centre for Medium-Range Weather Forecasts Scheme for Surface Exchanges over Land (H-TESSSEL) |
|    | SOC          | Soil organic matter content                                                                                               |
| 50 | BD           | Bulk density                                                                                                              |
|    | GGF          | Gravimetric gravel fraction                                                                                               |
|    | USDA         | The United States Department of Agriculture                                                                               |
|    | FD           | The mean particle diameter of fine component                                                                              |
|    | GD           | The mean particle diameter of gravels                                                                                     |
| 55 | BNU dataset  | Soil dataset from Shangguan et al. (2013) released by Beijing Normal University                                           |
|    | FC           | Field Capacity                                                                                                            |
|    | PWP          | Permanent Wilting Point                                                                                                   |
|    | $D$          | Soil diffusivity                                                                                                          |
|    | $K$          | Soil conductivity                                                                                                         |
