# Supplementary material for: Analysis of Soil Hydraulic and Thermal Properties for LandSurface Modelling over the Tibetan Plateau
Source: Copernicus journal article supplement (doi:10.5194/essd-2017-122), 2018-01-03
Supplement: Supplementary file [file essd-2017-122-AC2-supplement.zip]

# Analysis of Soil Hydraulic and Thermal Properties for Land Surface Modelling over the Tibetan Plateau

Hong Zhao, Yijian Zeng, Shaoning Lv, Zhongbo Su

Department of Water Resources, Faculty of Geo-Information Science and Earth Observation (ITC), University of Twente, Hengelosestraat 99, Enschede 7514AE, The Netherlands.

Correspondence to: Hong Zhao (h.zhao@utwente.nl)

## Abstract

Soil information (e.g. soil texture and porosity) from existing soil datasets over the Tibetan Plateau (TP) is claimed to be inadequate and even inaccurate for determining soil hydraulic properties(SHP) and soil thermal properties (STP), hampering the understanding of the land surface process over TP. As the soil varies across three dominant climate zones (i.e. arid, semi-arid, and sub-humid) over the TP, the associated SHP & STP is expected to vary correspondingly. To obtain an explicit insight into the soil hydro-thermal properties over the TP, *in situ* and laboratory measurements of over 30 soil property profiles were obtained across the climate zones. Results show that porosity and SHP & STP differ across the climate zones and strongly depend on soil texture. In particular, it is proposed that gravel impact on porosity and SHP & STP are both considered in the arid zone and in deep layers of the semi-arid zone. Parameterization schemes for porosity, SHP & STP are investigated and compared with measurements taken. To determine the SHP, including soil water retention curves and hydraulic conductivities, the pedotransfer functions (PTFs) developed by Cosby et al. (1984) (for the Clapp-Hornberger model) and the continuous Wösten et al. (1999) (for the van Genuchten-Mualem model) are recommended. The STP parameterization scheme proposed by Farouki (1981) based on the model of De Vries (1963) performed better across the TP than other schemes. Using the parameterization schemes mentioned above, the uncertainties of five existing regional and global soil datasets and their derived SHP/STP over the TP are quantified through comparison with *in situ* and laboratory measurements. The measured soil physical properties dataset is available at <https://data.4tu.nl/repository/uuid:c712717c-6ac0-47ff-9d58-97f88082ddc0>.

Keywords: Soil hydraulic and thermal properties; Tibetan Plateau; Pedotransfer functions; Soil Maps; Land Surface Model.

## 1. Introduction

As the highest plateau in the world, the Tibetan Plateau (TP) exerts a significant influence on the Earth's climate system and plays a prominent role in the evolution of the Asian monsoon system (Yao et al., 2012; Qiu, 2008; Ma et al., 2017; Kang et al., 2010). Studying this influence can advance our understanding of climate change (Ma et al., 2017). Soil Moisture (hereafter as SM) - one of the lower boundary conditions of the atmosphere - is a crucial land surface state (Koster et al., 2004) and therefore of high interest to investigate the land-atmosphere interactions, reflecting the trend and the variability of feedback between the water cycle and climate over the TP (Su et al., 2013; Su et al., 2011). Accurate SM information is claimed as a necessity for improving precipitation and hydrology forecasts (Drusch, 2007; Dirmeyer, 2000; Robinson et al., 2008) especially on the TP where it undergoes evident climate change (Ma et al., 2017; Douville et al., 2001; Yang et al., 2014; Yang et al., 2011). Consistent spatial-temporal SM data can be obtained by using land surface models (LSMs) assimilating *in situ* and satellite observations. In these models, the specification of soil hydraulic properties (SHP) (i.e. soil water retention curve, hydraulic conductivities) and soil thermal properties (STP) (i.e. thermal conductivities and heat capacity) are considered more decisive for SM simulation than atmospheric forcing and land surface characteristics (Shellito et al., 2016; Livneh et al., 2015; Kishné et al., 2017; Gutmann and Small, 2005), because SHP govern the partitioning of SM between infiltration and evaporation flux and STP regulate water heat transport processes (Zeng et al., 2009a; Zeng et al., 2009b; Garcia Gonzalez et al., 2012).

*In situ* measurements of basic soil properties and SHP & STP are crucial for soil moisture and heat flux simulation by LSMs. LSMs frequently use the Clapp and Hornberger (1978) model and the Van Genuchten (1980)-Mualem (1976) model for SHP, and the Farouki (1981) and Johansen (1975) schemes for STP. Since direct measurements of SHP & STP are always too time, labor and cost consuming, pedotransfer functions (PTFs) (Bouma, 1989; Van Looy et al., 2017) using basic soil property information have been developed to estimate parameters in the above SHP & STP schemes. Examples are the Cosby et al. (1984) PTF (e.g. based on sand fraction) for the CH scheme estimate in Noah and Community Land Model (Chen and Dudhia, 2001; Oleson et al., 2008), and the soil class PTF (e.g. based on soil texture types) for the VG scheme (Balsamo et al., 2009) in the Hydrology-Tiled European Centre for Medium-Range Weather Forecasts (ECMWF) Scheme for Surface Exchanges over Land (H-TESSEL). However, these aforementioned PTFs sometimes cannot predict well the SHP & STP, especially when soils contain organic matter or gravels (particle diameter  $\geq 2$  mm), because gravels and organic matter have different hydraulic and thermal properties than other fine mineral soils, and this suggests the necessity to obtain comprehensive soil properties information (e.g. not only soil texture and porosity information, but also soil organic content and gravel fraction).

Furthermore, studies using information on state variables (e.g. near-surface soil moisture or brightness temperature) can retrieve effective SHP & STP directly or indirectly through PTFs and LSMs (Ines and Mohanty, 2008a; Han et al., 2014; Dimitrov et al., 2014; Dimitrov et al., 2015; Yang et al., 2016). Nevertheless, most of such retrievals only focus on the basic surface soil properties and SHP, based on the assumption of a homogenous soil column. If the system is highly heterogeneous (e.g. along the vertical profile), retrieval may be problematic (Ines and Mohanty, 2008b) and *in situ* measurements of soil property profiles can shed light on the soil property retrieval of the vertical profile.

Many global and local efforts have been made to compile and develop soil databases, but uncertainties in soil datasets might also cause bias in predicting SHP & STP, and hence introduce uncertainties in representing the land surface states by LSMs. It has been reported that the overestimations of ECMWF SM analyses in the central TP could be partly attributed to the unrepresentative soil information from the FAO Digital Soil Map (2003) as used in the H-TESSEL (Su et al., 2013). Currently, there is only soil texture information and few soil organic content profiles available over the TP when extracted from the published global *in situ* soil profiles (Batjes et al., 2017). The profiles of other vital soil properties, such as dry bulk density (BD) and porosity, are not provided (e.g. no *in situ* BD or porosity profiles available). Moreover, there is no comprehensive *in situ* measurements of basic soil properties, SHP and STP for land surface modelling over the TP.

In this study, we implemented the *in situ* and laboratory measurements of soil physical property profiles across the three climate zones of the TP and compiled the Tibet-Obs soil properties dataset. Based on the dataset, the variations in basic soil properties and SHP & STP across the three climate zones were investigated. Applications of the Tibet-Obs dataset were demonstrated through two cases: 1) discussed the appropriate parameterization schemes of porosity and SHP & STP for their applicability in land surface modelling over the TP; 2) evaluated the uncertainties of the five existing regional and global soil datasets and their derived SHP & STP over the TP. In Section 2 of this

paper, the field campaign and laboratory experiments are described as well as the parameterization schemes for porosity and SHP & STP estimates. The specification of Tibet-Obs dataset with data availability are documented in Section 3. Results on the application of this dataset are presented in Section 4. Conclusions are presented in Section 5. This paper is expected to contribute to land surface modelling and hydro-climatology communities for their studies of the third pole environment, also to soil community in terms of filling geographic gaps of the published existing global soil databases.

85

90

## 2. Materials and methods

### 2.1 Field experiments

Soils show spatial variation over the TP due to the varying soil formation factors (e.g. climate & parent material). The TP can be categorized into three dominant climatic zones: an arid zone ( $0.03 < \text{Aridity Index (AI)} < 0.2$ ), a semi-arid zone ( $0.2 < \text{AI} < 0.5$ ) and a sub-humid zone ( $0.5 < \text{AI} < 1.0$ ), according to the Food and Agriculture Organisation (FAO) Aridity Index Map (Fig. 1a) (Zeng et al., 2016). The Tibetan Plateau Observatory of plateau scale soil moisture (SM) and soil temperature (ST) (Tibet-Obs) (Su et al., 2011) are distributed throughout these climatic zones: 1) the Ngari network in the arid zone, located in the western part of the TP with the elevation ranging between 4200 and 6300 m above mean sea level (a.s.l), where the annual mean temperature is  $1.01^\circ\text{C}$  and the annual mean precipitation amount is 66.4 mm, the land cover is a typical desert environment dominated by bare soil surrounded with sparse grass, and soils are prevailed by sandy soils mixed with gravel (Fig. 1b); 2) the Naqu network in the semi-arid zone, located in a flat terrain with rolling hills at an average elevation of 4500 m a.s.l, where the annual mean temperature is  $-0.6^\circ\text{C}$  and the annual mean precipitation amount is 482 mm, the land cover is characterized as grasslands consisting of prairie grasses and mosses, and soils are dominated by loamy sand with organic matter and gravels (Fig. 1c); and 3) the Maqu network in the sub-humid zone, located at the north-eastern edge of the TP with elevations ranging between 3430 m and 3750 m, where the annual mean temperature is  $1.8^\circ\text{C}$  and the precipitation is 600 mm annually with more than 70% falling during the monsoon season (e.g. from June till September). The land cover is dominated by short grassland, and soils are dominated by fine minerals with large silt proportions (Fig. 1d). Of these, the Naqu network is collocated with the multi-scale SMST monitoring network on the central Tibetan Plateau (CTP-SMTMN) (Yang et al., 2013).

A field experiment was carried out across the TP in August 2016, taking soil core samples and measuring field saturated hydraulic conductivity ( $K_s$ ) at various soil depths (Table 1 & Fig. 1). Soils were vertically sampled using sample rings and augers (Eijkelkamp Soil & Water Company) in the vicinity of existing SMST stations of the Tibet-Obs (Su et al. 2011). Table 1 lists the specific sampling approach: 1) the soil was sampled (c.a. 200 g) with a plastic bag used to measure gravel content, soil texture and soil organic content (SOC); 2) the soil was sampled with standard sample rings (5cm in height,  $100\text{ cm}^3$  in volume) for the determination of dry bulk density (BD), porosity and thermal conductivity ( $\lambda$ ); 3) for deriving the Soil Water Retention Curve (SWRC), a dedicated small sample ring (1 cm in height,  $20\text{ cm}^3$  in volume) was used; 4) the *in situ*  $K_s$  was measured using the Aardvark permeameter (2840 operating instructions - Eijkelkamp), a fully automated constant-head borehole permeameter. The Reynolds and Elrick solution aided with soil texture-structure category information (Elrick, 1989) was chosen for calculating  $K_s$ .

Within the Maqu network, soil samples were collected at eight stations, located in areas to the east, west and southeast of the ELEBARA-III radiometer location as well as in the southwest corner of the Maqu network (Fig. 1a). The  $K_s$  was measured at three locations near the ELBARA station, and at one location (CST05-near) in the southwest corner. Within the Naqu network, soil samples were taken at eight sites along the southwest branch of the CTP-SMTMN network (Fig. 1b), and the  $K_s$  was measured at seven sites at BJ, Naqu\_west, NQ01-04 and MS3608. Within the Ngari network, soils were sampled at 14 stations (Fig. 1c). Eight sites at Ali02, SQ03, SQ07, SQ10, SQ17, SQ18, SQ20 and SQ21 were chosen for  $K_s$  measurement. In total, 155 soils samples were taken and loaded into plastic bags, 101 samples were collected in standard rings and another 96 samples in small rings. Due to the remoteness and harsh environment on the TP, the locations chosen for soil sampling and fieldwork needed to take practical considerations into account, such as: 1) the location should be accessible by track, local road or national road; 2) the surrounding area should be flat enough to be representative of the local area.

### 2.2 Laboratory Experiments

Three categories of soil samples were handled. From the 155 samples (59 from Ngari, 45 from Naqu and 51 from Maqu) in plastic bags, the soils were first separated into gravels and fine minerals (size  $< 2\text{ mm}$ ) by using a sieve of 2 mm diameter mesh and weighed separately to obtain gravimetric gravel fractions (GGF). Sand ( $0.05\text{ mm} < \text{size} < 2\text{ mm}$ ), silt ( $0.002\text{ mm} < \text{size} < 0.05\text{ mm}$ ) and clay (size  $< 0.002\text{ mm}$ ) percentages, and the mean particle diameter of the fine minerals (FD) were determined with the Malvern Mastersizer 2000 particle size analyzer (<http://www.malvern.com>), and the SOC was determined by the Total Organic Content analytical instrument of Multi N/C 3100 (<http://www.analytik-jena.de/>). For gravels, a set of sieves with diameters of 2, 2.5, 4, 5, 7, 10, 16, 20, 25, 31.5, 40 and 50 mm were used to obtain their particle size distribution and the mean particle diameter of gravels (GD).

The 101 undisturbed soil samples (35 from Ngari, 21 from Naqu and 45 from Maqu) in standard sample rings were saturated and then dried in the oven ( $105^\circ\text{C}$ ) for 24 hours. The difference between wet and dry weight with known

volume was used to calculate porosity and BD. The KD2Pro thermal property analyzer connected to an SH-1 sensor (Decagon Devices) was used to measure heat capacity  $C_s$  and thermal conductivity  $\lambda$ , while the soil was drying, providing drying  $C_s$ -SM and  $\lambda$ -SM curves.

The 96 samples in small rings were intended for use in the SWRC experiment by using the pressure cell method, but to complete this entire task was considered too time and labor consuming. Therefore, instead of utilizing all soil samples, only 30 out of 96 samples were used for E-east, E-west, E-southwest, CST05-near, NST30 and NST33 sites in the Maqu network. As the structure of the samples at Naqu and Ngari networks was so unconsolidated that the material did not remain enclosed within the rings, only 25 undisturbed samples contained in standard rings were used from Naqu\_north, SQ17, SQ18 and SQ21 sites.

The quality of the measured soil property dataset was evaluated based on quality indicators (e.g. observation date, level of trust, data quality rating and accuracy) from World Soil Information (WoSIS) institute (Ribeiro et al., 2015). These four indicators provide measures that allow investigators to recognize factors that may compromise the quality of certain data and hence their suitability for use (Ribeiro et al., 2015). The results show that the dataset is of trust level 'C', which means the highest level of the subjective measure inferred from soil expert knowledge. The entered data (level 'A') have been standardized (level 'B'), i.e. data numbers were correspondingly aligned with measured soil properties involved in the GlobalSoilMap specifications (GlobalSoilMap, 2009) and with the measurement method and unit (see above paragraphs in Sec. 2.2). Level "B" dataset was further harmonized ("C") to be sorted in the reference table (Ribeiro et al., 2015). For instance, tables for the profile data (see Table S6 in the Supplement) described a soil profile and its attributes (e.g. land cover, position), and its constituent layers with their respective soil properties. These collated raw data included error-checking for possible inconsistencies. Furthermore, the values of the measured soil properties and SHP & STP were compared to those available in the literature to cross-check if they were within a reasonable range.

The collected basic soil properties and SHP & STP datasets named the Tibet-Obs dataset will be further used to evaluate the existing soil datasets of the FAO-UNESCO Soil Map of the World (2007) (hereafter as FAO-UNESCO), the Harmonized World Soil Database (hereafter as HWSD) (FAO/IIASA/ISRIC/ISSCAS/JR, 2012), a Chinese data set of soil properties (Shangguan et al., 2012; Shangguan et al., 2013) and soil hydraulic parameters using PTFs (Dai et al., 2013) released by Beijing Normal University (hereafter as BNU), "SoilGrids1km" (Hengl et al., 2014) and the updated version of "SoilGrids250m" (Hengl, 2017) released by the International Soil Reference and Information Center (ISRIC) - WoSIS institute, and the hydraulic parameters based on SoilGrids1km and Schaap et al. (2001) PTFs (hereafter as HPSS) (Montzka et al., 2017). The description of the existing datasets is listed in Table S1 of the Supplement. All datasets were linearly interpolated to match the measured dataset at specific depths, to ensure the (inter) comparability.

### 2.3 Parameterization Schemes

Many basic soil property dependent schemes have been proposed for porosity estimation. The Cosby et al. (1984)'s uni-variate PTF that uses sand percentage (hereafter the Cosby-S scheme, see Eq. (A1) in the Appendix) has been widely used, and it is to note that there is a multi-variate PTF (Cosby et al. (1984)) that uses clay as well as sand (Van Looy et al., 2017). Porosity can be inversely related with soil dry bulk density (Hillel, 2003) and calculated from *in situ* BD (hereafter the BD scheme, see Eq. (A2)). In most cases, these schemes perform well. However, with SOC in soils, soil porosity tends to increase. Another factor affecting porosity is the gravel content. As gravel content increases, the porosity tends to decrease. Chen et al. (2012) parameterized the impact of SOC and gravel content into a porosity estimation scheme (hereafter the SocVg scheme, see Eq. (A3-A6). Zhang et al. (2011) proposed a mixing-coefficient model to calculate porosity of binary mixture made of a coarse (gravel) and a fine component over a range of gravel content (hereafter the BM scheme, see Eq. (A7-A10)). In this study, as Fig. 2 shows, the Cosby-S, BD, SocVg and BM schemes were evaluated for their applicability over the three climate zones.

For the SHP estimate, we selected the Clapp and Hornberger (1978) (hereafter CH) and the Van Genuchten (1980) - Mualem (1976) (hereafter VG) schemes. Based on measured SWRCs, we used the scaling method (see Eq. (A15)) (Montzka et al., 2017) to determine the hydraulic parameters of saturated soil moisture ( $\theta_s$ ), soil water potential at air-entry ( $\phi_s$ ), and  $b$  - an empirical parameter related to the pore-size distribution of the soil matrix in the CH equation (see Eq. (A11-A12)), and parameters of  $\theta_s$ , residual soil moisture  $\theta_r$ ,  $\alpha$  - a parameter corresponding approximately to the inverse of the air-entry value,  $n$  - a shape parameter in the VG model (see Eq. (A13-A14)). The field capacity (FC) and the permanent wilting point (PWP) (regarded as the SM at about -33 kPa and -1500 kPa of

matric pressure, respectively) were also derived as they are the main parameters for soil water budget. Furthermore, the selected PTFs (see Table A1 in the Appendix) were used to estimate hydraulic parameters of SWRCs-CH and SWRCs-VG. Given that good  $\theta_s$  estimate will improve SWRCs prediction, the optimal porosity scheme will be pre-selected for predicting SWRCs-CH and SWRCs-VG. Estimated SWRCs from PTFs were further compared with the measurement determined SWRCs to indicate the uncertainty of using different PTFs.

Saturated hydraulic conductivity,  $K_s$ , combined with SWRCs-CH or SWRCs-VG is used to calculate the unsaturated hydraulic conductivity ( $K$ ) and diffusivity ( $D$ ). The PTFs used for SWRCs-CH and SWRCs-VG estimations also have corresponding equations (see footnotes in Table A1, Appendix) to predict  $K_s$ , and most PTFs were developed based on fine minerals. To estimate the  $K_s$  of a mixture containing gravels, Peck and Watson (1979) used a heat-flow analogy correlating the  $K_s$  of the mixture with the  $K_s$  of both fine minerals and the volumetric gravel fraction (VGF) (hereafter the *PTFs-VGF scheme*, see Eq. (A16)). This PTFs-VGF scheme can be applied to soils with low gravel content (Zhang et al., 2011). It is noted that the PTFs-VGF scheme needs an input ( $K_{sat,f}$ , see Appendix A.3) from the PTFs  $K_s$  estimation. Furthermore, Koltermann (1995) used the Kozeny–Carman equation to estimate the hydraulic conductivity for binary mixtures, and the suitable grain diameter estimation was declared important (Kamann et al., 2007). To improve the performance of the Kozeny–Carman equation, Zhang et al. (2011) introduced the BM scheme for estimating porosity and a power-averaging method for calculating representative grain diameter (hereafter the BM-KC scheme, see Eq. (A17-A19)). In this study, the standard PTFs (see Table A1 in the Appendix), PTFs-VGF and BM-KC schemes were employed as shown in Fig. 2.

Several (semi-) empirical models have been developed to estimate the soil thermal conductivity  $\lambda$ . De Vries (1963) developed a Maxwell equation analogous physics based model to describe  $\lambda$  (see Eq. (A22)). This model can predict  $\lambda$  accurately, although this is complicated by the fact that at least five soil mineral components and their separate shape features need to be taken into account (Tarnawski and Wagner, 1992). Furthermore, the effect of vapor movement caused by the temperature gradient is also parameterized in the De Vries (1963) model. It should be noted that the consideration of soil vapor flow is critical to accurately investigate the simultaneous transfer of moisture and heat, particularly in semi-arid and arid environments (Zeng et al., 2011a, b; Zeng and Su, 2013). Farouki (1981) proposed an alternative method and regarded liquid water as the continuous medium and soil minerals as uniform particles in the De Vries (1963) model. In this model, the  $\lambda$  of soil minerals was estimated by using a geometric mean equation from the quartz content in soil minerals and the  $\lambda$  of quartz and other soil minerals (see Eq. (A23)). The  $\lambda$  of vapor together with the shape factor for air pore were calculated in terms of water content and porosity (see Eq. (A24-A25)) (hereafter the *D63F scheme*). Tian et al. (2016) developed a simple and generalized De Vries-based model, which assumed that the  $\lambda$  and shape features of soil minerals were determined by soil texture (sand, clay and silt), and that the effect of vapor movement was negligible (hereafter the *T16 scheme*, see Eq. (A26-A29)). The empirical model proposed by Johansen (1975) used the Kersten (1949) number and  $\lambda$  in dry and saturated conditions to estimate  $\lambda$  (hereafter the *J75 scheme*, see Eq. (A30-A35)). In this study, as shown in Fig. 2, the D63F, T16 and J75 schemes were adopted. For each  $\lambda$  scheme, a comparison was made using parameters (i.e. the  $\lambda$  of soil minerals) with (see Eq. (A34)) and without (see Eq. (A23)) gravel / SOC considerations. The De Vries (1963) model was used for calculating  $C_s$  (see Eq. (A20-A21)). The details of porosity and SHP & STP schemes are listed in the Appendix (A.1–A5).

### 3. The Tibet-Obs dataset

#### 3.1 Data availability

The soil physical dataset is available at the 4TU.ResearchData data center at <https://data.4tu.nl/repository/uuid:c712717c-6ac0-47ff-9d58-97f88082ddc0>. The data is stored in .XLSX files. A readme file describes the structure of the EXCEL, the measurement devices and contact information. The download linkages of existing soil property datasets used in this paper are included in .txt file. The location of sampling is stored in .kmz file. The raw data for each sampling site is also provided.

#### 3.2 Basic analyses of the Tibet-Obs dataset

##### *Soil texture*

Figure 3 shows the mean of sand, clay and silt percentages, gravimetric gravel fraction (GGF), soil organic content (SOC), and the mean diameter of fine components and gravels (FD and GD) at different depths across the three climate zones over the TP. In Ngari network under the arid zone (Fig. 3a), the mean sand content was around 80% with higher values at surface layers of 5 and 10 cm than at deep layers. Silt and gravel contents ranged between 10-20% and the percentages increased with depth. Clay content and SOC were 3% and 0.8%, respectively, and remained constant along the profile. The FD and GD ranged from 0.19-0.24 mm and 4-8 mm, respectively, and showed a tendency to increase from the top to a depth of 20 cm, but to decrease in the deeper layers. It can be concluded that soil texture in the arid zone consists of a high proportion of coarse sand accompanied by gravel, and that the gravel content increases till 20 cm and then decreases slightly in the deeper layer.

In Naqu network under the semi-arid zone (Fig. 3b), the mean sand fraction ranged from 70-80% with a slight decrease with depth. The silt and clay contents ranged 15-25% and 4-8%, respectively, and increased with depth. The GGF exceeded 50% for soils at depths of 40 and 50 cm, while it was much lower at the shallow layers. Mean FD and GD ranged 0.18-0.22 mm and 4-8 mm, respectively. GD at deep layers was larger than that at shallow layers. SOC approached 10% in the surface layers but quickly declined at deep layers. It can be summed up that soil texture in the semi-arid zone is dominated by a high percentage of sand mixed with a small proportion of gravels, but with high SOC in shallow layers, and mainly mixed with big gravels at deep layers.

In Maqu network under the sub-humid zone (Fig. 3c), mean silt and clay contents were around 60% and 10%, respectively, with a smoothly decreasing trend along the profile. The mean sand fraction ranged from 28-40% and increased with depth. No gravel was found. Mean FD ranged from 0.024-0.036 mm, and fine soil mineral particles in deep layers (40 and 80 cm) were larger than in shallow layers (see Fig. 3c lower panel). Similar to the SOC profile distribution in the Naqu network, the SOC was almost 20% in surface soil layers and declined to 2.8% at 80cm. Soil texture in the sub-humid zone is characterized as being dominated by a high percentage of silt content with relatively large SOC in the shallow layers, and with mainly fine sand mixed in the deep layers.

##### *Dry bulk density & Porosity*

In Ngari network under the arid zone (Fig. 4a), the BD varied slightly (between 1.55 and 1.65 g/cm<sup>3</sup>) with depth, showing a peak at 10 cm. The porosity of the surface layer was slightly higher than in deep layers, with a mean profile porosity of 0.33. The porosity at 20 cm was the lowest in the profile, which might be caused by this layer containing the greatest proportion of gravel as well as the greatest GD and FD (see Fig. 3a). In Naqu network under the semi-arid zone (Fig. 4b), the BD increased continuously with depth, with a minimum of 1 g/cm<sup>3</sup> in the top layer and a maximum of 2.1 g/cm<sup>3</sup> in the bottom layer. The porosity peaked at around 0.6 at the top layer, while monotonously decreasing to 0.25 at the bottom layer. Combined with the soil texture analysis (see Fig. 3b), variations of BD and porosity in the profile were inferred relevant to the high SOC in the surface layer and the large gravel content in the bottom layer. In Maqu network under the sub-humid zone (Fig. 4c), the BD ranged from 0.8 to 1.5 g/cm<sup>3</sup> and increased with depth, while porosity decreased with depth and ranged from 0.72 to 0.45. The profile pattern of BD and porosity might be induced by SOC layering in the surface and soil texture fraction variations in the deep layers as Fig. 3c reveals. In summary, profiles of BD and porosity differ with soil texture variation over the three climate zones, and both the SOC and gravels affect the porosity. Overall porosity at shallow layers (5, 10 and 20 cm) increases from the arid to the semi-arid and to the sub-humid zones, while at deep layers (>= 40 cm) it shows an increase from the semi-arid to the arid and then the sub-humid zones.

##### *Soil water retention curve (SWRC) and saturated hydraulic conductivity (K<sub>s</sub>)*

Figure 5 shows the pressure-cell measured SWRCs (markers in the figure) differed across the three climate zones. In Ngari network under the arid zone, soil water retention quickly reduced as the suction slightly increased (Fig. 5a). The same situation occurs for the deep layers in Naqu network under the semi-arid zone (Fig. 5b). In Maqu network under the sub-humid zone, soil water retention was high and gradually decreased as the suction increased (Fig. 5c). Figure 5 also shows the CH and VG models captured the retention characteristic of soil water (lines in the figure) well across the three climate zones. Determined parameters of  $[\theta_s, b, \varphi_s]$  in the CH and  $[\theta_r, \theta_s, \alpha, n]$  in the VG models based on measured SWRCs and the scaling method are listed in Table 2.

In Ngari network under the arid zone (Fig. 6a), the magnitude of mean  $K_s$  was of the order of  $10^{-5}$  (m/s). The  $K_s$  at 20 cm was lower than at other depths, which might be due to the lowest values of porosity in this layer (see Fig. 4a). In Naqu network under the semi-arid zone (Fig. 6b), the mean  $K_s$  exhibited a variation of one order of magnitude with depth, namely  $10^{-6}$  (m/s) at depths of 10, 20 and 50 cm and  $10^{-5}$  (m/s) at a depth of 40 cm. In Maqu network under the sub-humid zone (Fig. 6c),  $K_s$  also differed by one order of magnitude:  $10^{-6}$  (m/s) at depths of 5, 10, 20 and 80 cm and  $10^{-7}$  (m/s) at a depth of 40 cm. It is to note that the  $K_s$  profiles of both the semi-arid and sub-humid zones presented a lower  $K_s$  in shallow layers than in the deeper layer. This is mainly due to the negative correlation between saturated hydraulic conductivity and soil organic carbon in soils where hydrophobic functional group might dominate with organic carbon composition and reduces soil wettability (Nemes et al., 2005; Wang et al., 2009; Ellerbrock et al., 2005). As can be seen,  $K_s$  varies with soil texture over the three climatic zones, and both SOC and gravels have an effect. At a certain depth, where the soil basic properties undergo a transition (see Fig. 3), the  $K_s$  reaches a minimum. The mean and the standard deviation of the soil properties of the profiles in the three climate zones are listed in the Supplement (Table S2-S4).

#### **Gravel impact on porosity and $K_s$**

Figures 7a&b show that porosity did not change with GGF increasing within 0.3 in shallow layers, while with a GGF > 0.4, porosity tended to decline with increasing GGF, especially in deep layers. For example, porosities for layers with a GGF of 0.6 and 0.72 at 20 cm and 40 cm depths were lower than those with a GGF < 0.3 at 5 cm and 10 cm depths (Fig. 7a). With more gravels embedded in the matrix, the flow paths in the soil would become blocked and the porosity reduced (Zhang et al., 2011). However, the porosity did not always decrease as the GGF increased. Porosity for the layer with a GGF of 0.84 in the semi-arid zone was higher than porosities with a GGF ranging between 0.4 and 0.6 at 50 cm depth (Fig. 7b). Porosity for the layer with a GGF of 0.7 at 20 cm depth in the arid zone was also higher than that with a GGF of 0.6 at 40 cm depth (Fig. 7a). Porosity tended to increase as the GGF continued to increase, because when a GGF is relatively high (> 1-porosity of gravels), connected pores can form among the gravels, and thus increase porosity (Zhang et al., 2011).

Figures 7c&d show a slight decrease in  $K_s$  at 10 cm with a GGF < 0.62 and a slight increase in  $K_s$  at 20 cm and 40 cm with a GGF > 0.8, which is consistent with the changes in porosity. The observations clearly show that gravels have a distinct impact on the porosity and  $K_s$  in the arid and semi-arid zones. It should be noted that, although the *in situ*  $K_s$  measurements were conducted at locations adjacent to the places where we took soil samples, heterogeneity may have had an effect on the values of soil properties and parameters throughout our sampling procedures, as with any soil field experimentation. Nevertheless, the current findings based on field experiments are in line with reported findings based on laboratory experiments (Zhang et al., 2011; Koltermann, 1995; Sakaki and Smits, 2015).

#### **Heat capacity $C_s$ and thermal conductivity $\lambda$**

Figures 8a&b show that the heat capacity  $C_s$  went up and down with SM increasing for Ngari and Naqu networks under the arid and semi-arid zones. Some samples from these two networks are fine-grained soils well mixture with gravels. For these samples, it is not easy to vertically insert needles of KD2Pro device (see Sect. 2.2), instead, the needles were buried with soils in the surface of the sample as the alternative for the measurement. Additionally, the KD2 needles might experience a slight skew when they touched the hard gravel. All these might cause the fluctuation of  $C_s$  when SM increased, while the overall rising trend was still observed in Figure 8a&b. Figure 8c shows  $C_s$  almost steadily increased with SM for the Maqu network under the sub-humid zone. Samples from sub-humid zone are all fine-grained soils and make the needle of KD2 device insert easily and thus form a steady environment for the measurement. Figures 8a&b&c show that no distinct layering at different depths existed for  $C_s$  with SM crossover the three climate zones. The  $C_s$  ranged from 1 at oven dry state to  $2.5 \text{ MJ m}^{-3} \text{ K}^{-1}$  as the soil reached saturation over the arid zone, 0.5 to  $3 \text{ MJ m}^{-3} \text{ K}^{-1}$  over the semi-arid zone, and 0.5 to  $2.4 \text{ MJ m}^{-3} \text{ K}^{-1}$  over the sub-humid zone.



Figures 8d&e&f show how the relationship of  $\lambda$ -SM varied with depth. For the arid zone (Fig. 8d), the  $\lambda$ -SM curves were very similar at each depth due to the nearly homogenous sandy soils across the whole profile (see Fig. 3a). The mean  $\lambda$  ranged from 1.8 at saturation and 0.2 ( $\text{W m}^{-1} \text{K}^{-1}$ ) as the soils reached oven-dry state. In the semi-arid zone (Fig. 8e), the  $\lambda$ -SM curves were stratified, and soils with gravels in deep layers (see Fig. 3b) clearly had a higher  $\lambda$  ( $>2 \text{ W m}^{-1} \text{K}^{-1}$ ) than in other layers and other climate zones. In the sub-humid zone (Fig. 8f), the  $\lambda$ -SM curves also presented variation with depth, though within a much narrower range than in the semi-arid zone. Such variation is mainly caused by the sand distribution along the profile, which increased slightly with depth (see Fig. 3c). The mean  $\lambda$  in the sub-humid zone ranged from 1.6-0.2 ( $\text{W m}^{-1} \text{K}^{-1}$ ) as soils dried out. Furthermore, the surface layers in the semi-arid and sub-humid zones had lower  $\lambda$  values (Figs. 8e&f) because of the SOC influence.

## 4. Applications of the Tibet-Obs dataset

### 4.1 Assessing parameterization schemes for LSMs

#### Porosity estimation

Using basic soil properties data of Tibet-Obs with four schemes, porosities were estimated. Comparisons against measured porosities (see Table A2 in the Appendix) indicate that the BD scheme performs the best for estimating porosity in profiles across the three climate zones, as it is a bulk estimation scheme that takes both gravel and fine minerals into consideration. The Cosby-S scheme overestimates porosities over the arid zone and provides constant porosity values over the semi-arid and sub-humid zones. The SocVg scheme also overestimated porosity, because the assumed porosity of gravels with a theoretical minimum value (0.363) is higher than the observed maximum (0.31) (Wu and Wang, 2006). The BM scheme estimates porosity well for soils with more gravels especially in the deep layers over the arid and semi-arid zones.

#### SWRC and $K_s$ estimations

Using basic soil properties data of Tibet-Obs with the selected PTFs (see Table A1), parameters of SWRCs-CH and SWRCs-VG were estimated (see Table A3 in the Appendix). Figure 9 shows comparisons of the estimated SWRCs from PTFs combined with the BD porosity scheme to the measurement determined SWRCs at 5 cm (see Sect. 3.2). The Saxton et al. (1986) PTFs overestimated the SWRCs-CH in the arid zone (Ngari), while the PTFs given by Campbell and Shiozawa (1992) and Saxton and Rawls (2006) underestimated them (Fig. 9a), and the Cosby et al. (1984) PTFs (1&2) presented good SWRCs-CH predictions with smaller absolute biases compared to measurements (see Table A4 in the Appendix). In the semi-arid zone (Naqu) (Fig. 9b), all PTFs underestimated the SWRCs-CH at 5 cm, while the Cosby et al. (1984) PTFs (1&2), Saxton et al. (1986) and Saxton and Rawls (2006) PTFs captured them well with lower biases compared to measurements (see Table A4). In the sub-humid zone (Maqu) (Fig. 9c), the Cosby et al. (1984) PTFs (1) and Saxton et al. (1986) PTFs predicted SWRCs-CH well. It is noteworthy that in combination with the BD scheme, the Cosby PTFs (1) performed much better regarding the estimation of SWRC-CH, compared with the estimates by the Cosby PTFs (1) combined with the Cosby-S porosity scheme (see section 3.2). On the other hand, without the BD scheme, the Saxton and Rawls (2006) PTFs were found to be performing better over the semi-arid and semi-humid zones (see Table S5 in the Supplement).

For the SWRCs-VG estimate, the Rosetta1-H3 and Rosetta3-H3 PTFs were developed based on the mixed database (Schaap et al., 2001). Fig. 9 (right panel) shows they underestimated SWRCs-VG across the three climate zones, as did the Rawls and Brakensiek (1985) PTFs. The Weynants et al. (2009) underestimated the SWRCs-VG in the semi-arid zone and the Class Wösten et al. (1999) PTFs overestimated (Fig. 9b). The Vereecken et al. (1989) PTFs, which were developed based on a database where hydraulic properties were measured for every sample with the same measurement techniques (Vereecken et al., 2010), performed well when the  $m$  was set at 1. However, these PTFs were not performing well for  $m=1-1/n$  in the VG model and overestimated SWRCs-VG heavily in the sub-humid zone (broken green line in Fig. 9c). The Continuous Wösten et al. (1999) PTFs were developed based on the database of Hydraulic Properties of European Soils (HYPRES) and as such were more affiliated with the database of Vereecken et al. (1989). The Weynants et al. (2009) PTFs were developed based on the Vereecken et al. (1989) database and included BD as the variable. These two PTFs predicted SWRCs-VG well for the three climate zones. Comparisons of the estimated SWRCs from PTFs to the measurements at 10, 20 and 40 cm were illustrated in Fig. S1 in the Supplement. Accordingly, the Cosby et al. (1984) PTFs (1) and the Continuous Wösten et al. (1999) PTFs combined with the BD porosity scheme are suggested to be most applicable for predicting the SWRCs-CH and SWRCs-VG, respectively, across the three climate zones.

Taking basic soil properties data of Tibet-Obs as the input, the  $K_s$  was estimated by using the PTFs scheme (see footnotes in Table A1), the empirical PTFs-VGF scheme (see Eq. (A16) in the Appendix) and the semi-physical BM-KC scheme (see Eq. (A17-A19)). Comparing them against the *in situ* measured  $K_s$ , Figure 10a&d show the PTFs scheme had a lower bias for predicting  $\text{Log}_{10} K_s$  than the PTFs-VGF and BM-KC schemes did for the arid zone (Ngari). In particular, the PTFs given by Cosby et al. (1984) (1&2) predicted good  $K_s$  that can be used in the CH model for estimating hydraulic conductivity ( $K$ ), and as the Rosetta1-H3 PTFs, Rosetta3-H3 PTFs and Rawls and Brakensiek (1985) did in the VG model. The  $K_s$  derived from BM-KC scheme had lower RMSE with measurements at 40 cm depth, indicating the gravel impact on  $K_s$ .

Figure 10b&e show that the BM-KC scheme predicted better  $K_s$  at depths of 10, 20 and 40 cm in the semi-arid zone (Naqu) than most PTFs and PTFs-VGF did. For  $K_s$  estimate used in the CH model, the Cosby et al. (1984) (1) PTFs performed best at shallow depths, while the PTFs-VGF of these PTFs were better at deep layers of 40 and 50 cm.

For the usage in the VG model,  $K_s$  derived from PTFs and PTFs-VGF schemes were almost the same, indicating that the estimated  $K_s$  used in the VG model is less affected by gravels. The Rosetta1-H3 PTFs predicted  $K_s$  better than other PTFs. Figure 10c&f show most of the PTFs underestimated  $K_s$ , while the selected PTFs (i.e. Cosby (1) & Rosetta1-H3) in the arid zone also predicted  $K_s$  close to the measurements in the sub-humid zone (Maqu). To sum up, the PTFs resulting from Cosby et al. (1984) (1) and Rosetta1-H3 PTFs are appropriate for estimating  $K_s$ , respectively used in the CH and VG models, across the three climate zones. PTFs-VGF of the Saxton and Rawls (2006) scheme should be applied in deep layers in the semi-arid zone, where gravel is abundant in the soil.

#### ***C<sub>s</sub> and $\lambda$ estimations***

Using basic soil properties data of Tibet-Obs, the  $C_s$  was estimated through the De Vries (1963) model. Comparing to  $C_s$  measured, this scheme performs well over the three climate zones. Furthermore, with the consideration of SOC impact, it improves the  $C_s$  estimates for soils at top layers in the semi-arid and sub-humid zones (see Table A5 in the Appendix).

Based on the Tibet-Obs basic soil properties data, the D63F, T16 and J75 schemes combined with the BD porosity scheme were used to estimate the  $\lambda$ . For the arid (Ngari) and semi-arid (Naqu) regions, the estimation of  $\lambda$  considered two scenarios: with (Case 1) and without (Case 2) gravel impact. For the sub-humid region (Maqu),  $\lambda$  estimation with (Case 1) and without (Case 2) SOC impact were considered. Table 3 shows that the  $\lambda$  derived from D63F model had a lower bias in all cases compared to the measurement than other schemes across the three climate zones. The T16 scheme overestimated  $\lambda$ , which may be due to its ideal assumption that the  $\lambda$  of soil minerals is totally determined by sand, clay and silt particles. The J75 scheme generally underestimated the  $\lambda$ .

Table 3 also shows that the D63F scheme improved the  $\lambda$  estimate at surface layers in the arid zone and at a depth of 50 cm when incorporating gravel impact parameterization (lower biases in Case 2). The improvement also occurred with the T16 scheme, while biases tended to be greater for the J75 scheme. In the sub-humid zone, biases also became larger for all schemes when SOC impact parameterization was considered. Although parameterization of the SOC impact was demonstrated to improve the  $\lambda$  estimate in the top layer (SOC > 12%) over the Eastern TP (Chen et al., 2012; Zheng et al., 2015), it should be noted that, in these studies for porosity estimate, the Cosby-S scheme was used instead of the BD scheme as adopted in this paper (see Sec. 4.1). Comparisons in Figure 11 indicate that the D63F scheme combined with the BD porosity scheme can predict  $\lambda$  well across the three climate zones. It is to note that combining with the Cosby-S scheme, the D63F scheme also performs well (see Fig. S2 in the Supplement).

#### **4.2 Evaluation of the existing soil datasets**

The current existing global and regional soil datasets, including FAO-UNESCO (FAO/UNESCO, 2007), HWSD (FAO/IIASA/ISRIC/ISSCAS/JR, 2012), BNU (Shangguan et al., 2012; Shangguan et al., 2013), SoilGrid1km (Hengl et al., 2014), SoilGrid250km and HPSS (Montzka et al., 2017), were extracted for the TP and compared with the *in situ* and laboratory measurements of Tibet-Obs.

##### ***Basic soil properties***

Figure 11 shows that all datasets underestimated both the sand fraction and BD in the arid and semi-arid regions, while overestimated them in the sub-humid region. For the silt fraction, the pattern was reversed. Almost all datasets overestimated the silt fraction in the arid and semi-arid regions (only FAO-UNESCO underestimated silt very slightly in the semi-arid region), and underestimated the silt fraction in the sub-humid region. All datasets overestimated the clay fraction throughout the three climate zones.

The estimates of SOC from all the datasets were within 1% range of the measurements across the arid and semi-arid zones, and within 10% across the sub-humid zone, apart from the FAO-UNESCO data, which underestimated the SOC heavily in this region. Most of the GGF estimates for the arid zone were within 10%, with the FAO-UNESCO data underestimating by 20%. For the semi-arid and sub-humid regions, all datasets consistently, underestimated and overestimated the GGF, respectively.

The BD scheme was used to derive porosity from the existing datasets. Figure 12a shows that the estimations of porosity were higher than the *in situ* measurement for the arid zone, with the SoilGrid1km and HWSD providing the closest approximations. In the semi-arid zone (Fig. 12b), all datasets underestimated porosity at the top layer, but overestimated it at other depths. It should be noted that SoilGrid1km and SoilGrid250m presented porosity almost as a constant figure in each profile, which is not representative for conditions in the field. The porosity estimations from FAO-UNESCO, HWSD and BNU did show profile variation, although much less than the *in situ*

measurements did. In the sub-humid region (Fig. 12c), all datasets underestimated porosity in the surface layers 5, 10 and 20 cm, and either underestimated or overestimated porosity in the deep layers.

#### **SWRC and $K_s$**

As previous analysis of PTFs (see Sect. 4.1) suggested, the Cosby et al. (1984) and continuous Wösten et al. (1999) PTFs were used with basic soil properties (i.e. only texture, BD and SOC) from the independent datasets (e.g. SoilGrids etc.) to estimate respectively SWRCs-CH and SWRCs-VG. Given the relatively homogenous soil profile derived from existing products (see Fig. 13), the averaged SWRCs derived from existing datasets over different depths were used for comparison with the laboratory measurements.

Figure 13a shows all datasets overestimated SWRCs in the arid zone, in the order of FAO-UNESCO > BNU > HWSD > SoilGrid250m > (HPSS for VG model) > SoilGrid1km > Tibet-Obs. In the semi-arid zone (Fig. 13b), all datasets underestimated SWRCs at the surface layers of 5 and 10 cm, while overestimated at deep layers. FAO-UNESCO captured the SWRCs-CH at surface layers well, and BNU presented the closest estimations for deep layers. Regarding SWRCs-VG, SoilGrid250m and HWSD, respectively, matched the measurements at surface and deep layers well. In the sub-humid zone (Fig. 13c), all datasets showed similar SWRCs-CH, slightly underestimating at low suction (< 100 kPa) but then becoming consistent with the measurements. The results for SWRCs-VG were quite diverse. The HWSD and HPSS showed consistent underestimation. The FAO-UNESCO and BNU closely matched the measurements in deep layers. The SoilGrid1km and SoilGrid250m were within the range of the measurements across the whole profile, although their mean values were larger at high suction range (>300 kPa). Furthermore, it should be noted that the averaged profile SWRCs derived from Tibet-Obs tended to reflect SWRCs at deep layers over the three climate zones. Additionally, the SoilGrid1km-, HWSD- and SoilGrid1km-derived FC (0.37, 0.41, 0.51 cm<sup>3</sup> cm<sup>-3</sup>) and PWP (0.16, 0.20, 0.27 cm<sup>3</sup> cm<sup>-3</sup>) were found close to the mean measured values over the three respective climate zones (see Table A6 in the Appendix).

Using basic soil properties (i.e. only texture, BD and SOC) from the independent datasets (e.g. SoilGrids etc.) with the Cosby et al. (1984) (1) and Rosetta1-H3 PTFs, Table 4 shows mean predicted  $K_s$  (10<sup>-6</sup> m/s) for all existing datasets across the three climate zones. They were of a smaller order than the field measurements in the arid and semi-arid zones but of a larger order than some of the field measurements in the sub-humid zone. The Tibet-Obs dataset as input in the applicable PTFs predicted  $K_s$  well. The existing datasets for estimating SWRCs: SoilGrid1km, HWSD, and SoilGrid1km, also performed well estimating  $K_s$  in the three climate zones, respectively.

#### **SHP & STP in LSMs**

Most of LSMs use Richards' equation for soil water flow modelling (see A.6 in the Appendix) with the hydraulic conductivity. While in some LSMs (e.g. Noah and H-TESSEL), soil diffusivity ( $D$ ) is used. When the soil dries down, with the largest pores in the soil draining, the  $K$  and  $D$  are reduced many orders of magnitude from saturation to dryness (Bittelli et al., 2015). Lower  $K$  (higher  $D$ ) will result in slower water transport, and thereby subsequently a higher SM derived from LSMs compared to soil moisture measurements, and vice versa.

LSMs use thermal diffusion equation for soil heat transport modelling (see A.6 in the Appendix). Soil heat capacity ( $C_s$ ) and thermal conductivity ( $\lambda$ ) are the important thermal parameters in the equation. Lower  $\lambda$  with higher  $C_s$  will lead to reduced soil heat fluxes, and thereby subsequently the higher soil temperature derived from LSMs compared to soil temperature measurements, and vice-versa. The curves of  $K$ ,  $D$ ,  $C_s$  and  $\lambda$  derived by using basic soil properties from the independent datasets (SoilGrids etc.) with recommended parameterization schemes were compared to the measurements (see Fig. A1- A3 in the Appendix) for quantifying the LSMs' uncertainty inherited from soil dataset. A special case is formed by the FAO-UNESCO dataset, which slightly overestimated VG-K at surface layers and heavily underestimated it at deep layers, while heavily overestimated VG-D at surface layers and slightly underestimated it at deep layers. These would lead to the overestimation of derived SM, as the ECMWF SM analyses do in this region (Su et al., 2013). The uncertainty from soil dataset also propagates to soil temperature estimation. The FAO-UNESCO dataset underestimated  $C_s$ -SM at surface layers, but overestimated  $\lambda$ -SM, while at other depths estimating  $C_s$ -SM well, but underestimating  $\lambda$ -SM. These would lead to the underestimation of the simulated soil temperature, which is also consistent with the findings of ECMWF soil temperature analyses (Su et al., 2013).

## 5. Conclusions

For this study an *in situ* measurement dataset of soil physical properties was set up across the arid (Ngari), semi-arid (Naqu) and sub-humid (Maqu) climate zones across the Tibetan Plateau. The dataset can fill geographical gaps of global profiles on the third pole region. Analyzing this *in situ* dataset shows that soil texture in the Ngari network under the arid zone consists of a high proportion of coarse sand accompanied by gravel, and that the gravel content increases till 20 cm and then decreases slightly in the deeper layer. Dry bulk density (BD) and porosity vary with depths slightly. Soil texture in the Naqu network under the semi-arid zone is dominated by a high percentage of sand mixed with a small proportion of gravels, but with high SOC in shallow layers, and mainly mixed with big gravels at deep layers. The BD is with a minimum in the top layer and a maximum in the bottom layer, and the porosity presents the opposite. Soil texture in the Maqu network under the sub-humid zone, is dominated by a high percentage of silt content with relatively large SOC in the shallow layers, and with mainly fine sand mixed in the deep layers. The BD increases with depth and the porosity decreases. Depending on basic soil properties varying over three climate zones, soil hydraulic properties (SHP, i.e. soil water retention curve, hydraulic conductivity) and thermal properties (STP, i.e. heat capacity and thermal conductivity) differ for each climate zone and vary within each profile, (e.g. presenting layering in the semi-arid and sub-humid zones), and gravels were found affecting porosity and SHP & STP in the arid zone and in deep layers of the semi-arid zone.

Various schemes for estimating the porosity and SHP & STP over the TP were examined. The Cosby et al. (1984) PTFs proved more applicable for SHP estimation by the Clapp and Hornberger (1978) (CH) model, and the continuous Wösten et al. (1999) PTFs for SHP estimation by the Van Genuchten (1980) - Mualem (1976) (VG) model. The original formulation of the De Vries (1963) model can be deployed successfully for estimating the heat capacity of a profile. Furthermore, the De Vries (1963) model combined with the Farouki (1981) scheme (D63F) and with the implementation of the BD porosity scheme proved superior for estimating thermal conductivity.

Referenced by the measurements, uncertainties of the existing soil basic property datasets and their derived SHP & STP were quantified across the TP. This information is of significance on assessing the LSMs' uncertainty inherited from soil datasets, moreover, on screening the proper soil datasets for LSMs over the TP. Furthermore, the existing soil property datasets can be also used as the ancillary data for SM retrieval. For example, the composited datasets of FAO and HWSD were used in the Soil Moisture and Ocean Salinity (SMOS) and Soil Moisture Active Passive (SMAP) SM product generation. Therefore the information also became valuable for understanding uncertainties in satellite SM products inherited from soil maps. Based on the dataset comparison, this paper indicates that SoilGrid1km can reduce such uncertainty and is therefore recommended for use in the arid and sub-humid zones, while the combination of FAO-UNESCO at shallow layers and HWSD at deep layers is recommended for the semi-arid zone over the TP.

In summary, this paper provides a comprehensive *in situ* measured dataset of soil physical properties over the TP and presents the applicable schemes to use for porosity and SHP & STP estimation in the LSM across the TP. The dataset contributes significantly for generating spatial-temporally consistent soil moisture and temperature estimates by LSMs. Furthermore, the evaluation of the existing soil property datasets is crucial for quantifying the uncertainty arising from soil data used in the LSMs and in soil moisture retrieval from microwave remote sensing.

**Author contributions:** Yijian Zeng and Zhongbo Su conceptualized the experiment design; Hong Zhao designed the experiment with the help of Yijian Zeng; Hong Zhao conducted the field experiment and lab experiment, summarizing/organizing data; the authors, including Shaoning Lv, were involved in the fieldwork; Hong Zhao wrote the paper. Yijian Zeng and Zhongbo Su commented and revised the paper.

**Acknowledgements:** We acknowledge the financial support from the Chinese Scholarship Council (CSC) for Hong Zhao. We thank Prof. Yaowen Xie and Dr. Jizong Jiao for their assistance with the laboratory experiment in Lanzhou University, China, and Dr. Xin Wang, Dr. Hui Tian, Mr. Zuoliang Wang and Jinlei Chen for their help with field soil sampling. We also appreciate Prof. Montzka providing the code for the parameter fitting algorithm and Mrs. Eva Skidmore doing English editing.

**Conflicts of Interest:** The authors declare no conflict of interest.

## Reference

- Balsamo, G., Beljaars, A., Scipal, K., Viterbo, P., van den Hurk, B., Hirschi, M., and Betts, A. K.: A revised hydrology for the ECMWF model: Verification from field site to terrestrial water storage and impact in the Integrated Forecast System, *J. Hydrometeorol.*, 10, 623-643,doi: 10.1175/2008JHM1068.1, 2009.
- 545 Batjes, N. H., Ribeiro, E., van Oostrum, A., Leenaars, J., Heng, T., and Mendes de Jesus, J.: WoSIS: Serving standardised soil profile data for the world, *Earth System Science Data*, 9, 1,doi: 10.5194/essd-9-1-2017, 2017.
- Bittelli, M., Campbell, G. S., and Tomei, F.: *Soil Physics with Python: Transport in the Soil-Plant-Atmosphere System*, OUP Oxford, 2015.
- 550 Bouma, J.: Using soil survey data for quantitative land evaluation, in: *Adv. Soil Sci.*, Springer, 177-213, 1989.
- Campbell, G., and Shiozawa, S.: Prediction of hydraulic properties of soils using particle-size distribution and bulk density data, Indirect methods for estimating the hydraulic properties of unsaturated soils. University of California, Riverside, 317-328, 1992.
- 555 Chen, F., and Dudhia, J.: Coupling an advanced land surface-hydrology model with the Penn State-NCAR MM5 modeling system. Part I: Model implementation and sensitivity, *Mon. Wea. Rev.*, 129, 569-585,doi: 10.1175/1520-0493(2001)129<0569:CAALSH>2.0.CO;2, 2001.
- Chen, Y., Yang, K., Tang, W., Qin, J., and Zhao, L.: Parameterizing soil organic carbon's impacts on soil porosity and thermal parameters for Eastern Tibet grasslands, *Sci. China. Earth. Sci.*, 55, 1001-1011,doi: 10.1007/s11430-012-4433-0 2012.
- 560 Clapp, R. B., and Hornberger, G. M.: Empirical equations for some soil hydraulic properties, *Water. Resour. Res.*, 14, 601-604,doi: 10.1029/WR014i004p00601, 1978.
- Cosby, B., Hornberger, G., Clapp, R., and Ginn, T.: A statistical exploration of the relationships of soil moisture characteristics to the physical properties of soils, *Water. Resour. Res.*, 20, 682-690,doi: 10.1029/WR020i006p00682, 1984.
- 565 Dai, Y., Shangguan, W., Duan, Q., Liu, B., Fu, S., and Niu, G.: Development of a China Dataset of Soil Hydraulic Parameters Using Pedotransfer Functions for Land Surface Modeling, *J. Hydrometeorol.*, 14, 869-887,doi: 10.1175/JHM-D-12-0149.1, 2013.
- De Vries, D. A.: Thermal properties of soils, *Phys. Plant. Env.*, 1963.
- 570 Dimitrov, M., Vanderborght, J., Kostov, K. G., Jadoon, K. Z., Weihermüller, L., Jackson, T. J., Bindlish, R., Pachepsky, Y., Schwank, M., and Vereecken, H.: Soil Hydraulic Parameters and Surface Soil Moisture of a Tilled Bare Soil Plot Inversely Derived from L-Band Brightness Temperatures, *V. Z. J.*, 13, 0,doi: 10.2136/vzj2013.04.0075, 2014.
- Dimitrov, M., Vanderborght, J., Kostov, K., Debecker, B., Schulze Lammers, P., Damerow, L., and Vereecken, H.: Soil Hydraulic Parameters of Bare Soil Plots with Different Soil Structure Inversely Derived from L-Band Brightness Temperatures, *V. Z. J.*, 14,doi: 10.2136/vzj2014.09.0133, 2015.
- 575 Dirmeyer, P. A.: Using a global soil wetness dataset to improve seasonal climate simulation, *Journal of Climate*, 13, 2900-2922, 2000.
- Douville, H., Chauvin, F., and Broqua, H.: Influence of soil moisture on the Asian and African monsoons. Part I: Mean monsoon and daily precipitation, *Journal of Climate*, 14, 2381-2403, 2001.
- 580 Drusch, M.: Initializing numerical weather prediction models with satellite - derived surface soil moisture: Data assimilation experiments with ECMWF's Integrated Forecast System and the TMI soil moisture data set, *J. Geophys. Res. Atmos.*, 112, 2007.
- Ellerbrock, R., Gerke, H., Bachmann, J., and Goebel, M.: Composition of organic matter fractions for explaining wettability of three forest soils, *Soil Science Society of America Journal*, 69, 57-66, 2005.
- 585 Elrick, D. E., W. D. Reynolds, and K. A. Tan: Hydraulic Conductivity Measurements in the Unsaturated Zone Using Improved Well Analyses, *Ground. Water. Monit. R.*, 8, 193,doi: 10.1111/j.1745-6592.1989.tb01162.x, 1989.

590 FAO/IIASA/ISRIC/ISSCAS/JR: Harmonized World Soil Database (version 1.2), Food and Agric. Organ.,  
 Rome., 2012.  
 FAO/UNESCO: The FAO-UNESCO soil map of the World, 2007.  
 Farouki, O. T.: The thermal properties of soils in cold regions, *Cold. Reg. Sci. Technol.*, 5, 67-75,doi:  
 10.1016/0165-232X(81)90041-0, 1981.  
 Frings, R. M., Schüttrumpf, H., and Vollmer, S.: Verification of porosity predictors for fluvial sand - gravel  
 595 deposits, *Water. Resour. Res.*, 47,doi: 10.1029/2010WR009690, 2011.  
 Garcia Gonzalez, R., Verhoef, A., Luigi Vidale, P., and Braud, I.: Incorporation of water vapor transfer in  
 the JULES land surface model: Implications for key soil variables and land surface fluxes, *Water. Resour.*  
*Res.*, 48, 2012.  
 Gutmann, E., and Small, E.: The effect of soil hydraulic properties vs. soil texture in land surface models,  
 600 *Geophys. Res. Lett.*, 32,doi: 10.1029/2004GL021843, 2005.  
 Han, X., Franssen, H.-J. H., Montzka, C., and Vereecken, H.: Soil moisture and soil properties estimation  
 in the Community Land Model with synthetic brightness temperature observations, *Water. Resour. Res.*,  
 50, 6081-6105,doi: 10.1002/2013wr014586, 2014.  
 Hengl, T., de Jesus, J. M., MacMillan, R. A., Batjes, N. H., Heuvelink, G. B., Ribeiro, E., Samuel-Rosa, A.,  
 605 Kempen, B., Leenaars, J. G., and Walsh, M. G.: SoilGrids1km—global soil information based on  
 automated mapping, *PloS. one.*, 9, e105992,doi: 10.1371/journal.pone.0105992, 2014.  
 Hengl, T.: SoilGrids250m: Global Gridded Soil Information Based on Machine Learning, *PloS. one.*,doi:  
 10.1371/journal.pone.0169748, 2017.  
 Hillel, D.: Introduction to environmental soil physics, Academic press, 2003.  
 610 Ines, A. V., and Mohanty, B. P.: Near - surface soil moisture assimilation for quantifying effective soil  
 hydraulic properties using genetic algorithm: 1. Conceptual modeling, *Water. Resour. Res.*, 44,doi:  
 10.1029/2007WR005990, 2008a.  
 Ines, A. V. M., and Mohanty, B. P.: Near-Surface Soil Moisture Assimilation for Quantifying Effective Soil  
 Hydraulic Properties under Different Hydroclimatic Conditions, *V. Z. J.*, 7, 39,doi: 10.2136/vzj2007.0048,  
 615 2008b.  
 Johansen, O.: Thermal conductivity of soils, DTIC Document, 1975.  
 Kamann, P. J., Ritz, R. W., Dominic, D. F., and Conrad, C. M.: Porosity and permeability in sediment  
 mixtures, *Ground. Water.*, 45, 429-438,doi: 10.1111/j.1745-6584.2007.00313.x, 2007.  
 Kang, S., Xu, Y., You, Q., Flügel, W.-A., Pepin, N., and Yao, T.: Review of climate and cryospheric change  
 620 in the Tibetan Plateau, *Environ. Res. Lett.*, 5, 015101,doi: 10.1088/1748-9326/5/1/015101, 2010.  
 Kersten, M. S.: Laboratory Research for The Determination of The Thermal Properties of Soils, DTIC  
 Document, 1949.  
 Kishné, A. S., Yimam, Y. T., Morgan, C. L., and Dornblaser, B. C.: Evaluation and improvement of the  
 default soil hydraulic parameters for the Noah Land Surface Model, *Geoderma.*, 285, 247-259,doi:  
 625 10.1016/j.geoderma.2016.09.022, 2017.  
 Koltermann, C. E., and Steven M. Gorelick: Fractional packing model for hydraulic conductivity derived  
 from sediment mixtures, *Water. Resour. Res.*, 31, 3297,doi: 10.1029/95WR02020, 1995.  
 Koster, R. D., Dirmeyer, P. A., Guo, Z., Bonan, G., Chan, E., Cox, P., Gordon, C., Kanae, S., Kowalczyk, E.,  
 and Lawrence, D.: Regions of strong coupling between soil moisture and precipitation, *Science.*, 305,  
 630 1138-1140,doi: 10.1126/science.1100217, 2004.  
 Livneh, B., Kumar, R., and Samaniego, L.: Influence of soil textural properties on hydrologic fluxes in the  
 Mississippi river basin, *Hydrol. Process.*, 29, 4638-4655,doi: 10.1002/hyp.10601, 2015.  
 Ma, Y., Ma, W., Zhong, L., Hu, Z., Li, M., Zhu, Z., Han, C., Wang, B., and Liu, X.: Monitoring and Modeling  
 the Tibetan Plateau's climate system and its impact on East Asia, *Sci. Rep.*, 7, 44574,doi:  
 635 10.1038/srep44574, 2017.

Marquardt, D. W.: An algorithm for least-squares estimation of nonlinear parameters, *J. Soc. Indust. Appl. Math.*, 11, 431-441,doi: 10.1137/0111030, 1963.

Montzka, C., Herbst, M., Weihermüller, L., Verhoef, A., and Vereecken, H.: A global data set of soil hydraulic properties and sub-grid variability of soil water retention and hydraulic conductivity curves, *Earth System Science Data*, 9, 529,doi: 10.5194/essd-9-529-2017, 2017.

640 Mualem, Y.: A new model for predicting the hydraulic conductivity of unsaturated porous media, *Water. Resour. Res.*, 12, 513-522,doi: 10.1029/WR012i003p00513, 1976.

Nemes, A., Rawls, W. J., and Pachepsky, Y. A.: Influence of Organic Matter on the Estimation of Saturated Hydraulic Conductivity, *Soil Sci. Soc. Am. J.*, 69, 1330,doi: 10.2136/sssaj2004.0055, 2005.

645 Oleson, K., Niu, G. Y., Yang, Z. L., Lawrence, D., Thornton, P., Lawrence, P., Stöckli, R., Dickinson, R., Bonan, G., and Levis, S.: Improvements to the Community Land Model and their impact on the hydrological cycle, *J. Geophys. Res. Biogeosci.*, 113,doi: 10.1029/2007JG000563, 2008.

Peck, A., and Watson, J.: Hydraulic conductivity and flow in non-uniform soil, *Workshop on soil physics and field heterogeneity*. CSIRO Division of Environmental Mechanics, Canberra, Australia, 1979,

650 Qiu, J.: China: the third pole, *Nature. News.*, 454, 393-396,doi: 10.1038/454393a, 2008.

Rawls, W. J., and Brakensiek, D.: Prediction of soil water properties for hydrologic modeling, *Proceedings of the Symposium on Watershed Management in the Eighties*, New York, NY, USA, 1985, 293-299,

Ribeiro, E., Batjes, N. H., Leenaars, J. G., Van Oostrum, A., and de Mendes, J.: Towards the standardization and harmonization of world soil data: *Procedures Manual ISRIC World Soil Information Service (WoSIS version 2.0)*, ISRIC-World Soil Information: Wageningen, The Netherlands, 2015.

655 Richards, L. A.: Capillary conduction of liquids through porous mediums, *Journal of Applied Physics*, 1, 318-333, 1931.

Robinson, D., Campbell, C., Hopmans, J., Hornbuckle, B., Jones, S. B., Knight, R., Ogden, F., Selker, J., and Wendroth, O.: Soil moisture measurement for ecological and hydrological watershed-scale

660 observatories: A review, *V. Z. J.*, 7, 358-389, 2008.

Sakaki, T., and Smits, K. M.: Water Retention Characteristics and Pore Structure of Binary Mixtures, *V. Z. J.*, 14, 0,doi: 10.2136/vzj2014.06.0065, 2015.

Saxton, K., Rawls, W. J., Romberger, J., and Papendick, R.: Estimating generalized soil-water characteristics from texture, *Soil Sci. Soc. Am. J.*, 50, 1031-1036,doi: 10.2136/sssaj1986.03615995005000040039x, 1986.

665 Saxton, K., and Rawls, W.: Soil water characteristic estimates by texture and organic matter for hydrologic solutions, *Soil Sci. Soc. Am. J.*, 70, 1569-1578,doi: 10.2136/sssaj2005.0117, 2006.

Schaap, M. G., Leij, F. J., and van Genuchten, M. T.: ROSETTA: a computer program for estimating soil hydraulic parameters with hierarchical pedotransfer functions, *J. Hydrol.*, 251, 163-176,doi: 10.1016/S0022-1694(01)00466-8, 2001.

670 Shangguan, W., Dai, Y., Liu, B., Ye, A., and Yuan, H.: A soil particle-size distribution dataset for regional land and climate modelling in China, *Geoderma.*, 171, 85-91,doi: 10.1016/j.geoderma.2011.01.013, 2012.

Shangguan, W., Dai, Y., Liu, B., Zhu, A., Duan, Q., Wu, L., Ji, D., Ye, A., Yuan, H., and Zhang, Q.: A China data set of soil properties for land surface modeling, *J. Adv. Model. Earth. Syst.*, 5, 212-224,doi: 10.1002/jame.20026, 2013.

675 Shellito, P. J., Small, E. E., and Cosh, M. H.: Calibration of Noah Soil Hydraulic Property Parameters Using Surface Soil Moisture from SMOS and Basinwide In Situ Observations, *J. Hydrometeorol.*, 17, 2275-2292,doi: 10.1175/jhm-d-15-0153.1, 2016.

680 Su, Z., Wen, J., Dente, L., van der Velde, R., Wang, L., Ma, Y., Yang, K., and Hu, Z.: The Tibetan Plateau observatory of plateau scale soil moisture and soil temperature (Tibet-Obs) for quantifying uncertainties in coarse resolution satellite and model products, *Hydrol. Earth Syst. Sci.*, 15, 2303-2316,doi: 10.5194/hess-15-2303-2011, 2011.



685 Su, Z., de Rosnay, P., Wen, J., Wang, L., and Zeng, Y.: Evaluation of ECMWF's soil moisture analyses using  
observations on the Tibetan Plateau, *J. Geophys. Res. Atmos.*, 118, 5304-5318,doi: 10.1002/jgrd.50468,  
2013.

Tarnawski, V. R., and Wagner, B.: A new computerized approach to estimating the thermal properties of  
unfrozen soils, *Can. Geotech. J.*, 29, 714-720,doi: 10.1139/t92-079, 1992.

690 Tian, Z., Lu, Y., Horton, R., and Ren, T.: A simplified de Vries-based model to estimate thermal  
conductivity of unfrozen and frozen soil, *Eur. J. Soil. Sci.*, 67, 564-572,doi: 10.1111/ejss.12366, 2016.

Van Genuchten, M. T.: A closed-form equation for predicting the hydraulic conductivity of unsaturated  
soils, *Soil. Sci. Soc. Am. J.*, 44, 892-898,doi: 10.2136/sssaj1980.03615995004400050002x, 1980.

Van Looy, K., Bouma, J., Herbst, M., Koestel, J., Minasny, B., Mishra, U., Montzka, C., Nemes, A.,  
Pachepsky, Y. A., Padarian, J., Schaap, M. G., Tóth, B., Verhoef, A., Vanderborght, J., van der Ploeg, M. J.,  
695 Weihermüller, L., Zacharias, S., Zhang, Y., and Vereecken, H.: Pedotransfer Functions in Earth System  
Science: Challenges and Perspectives, *Reviews of Geophysics*, 55, 1199-1256,doi:  
10.1002/2017rg000581, 2017.

Vereecken, H., Maes, J., Feyen, J., and Darius, P.: Estimating the soil moisture retention characteristic  
from texture, bulk density, and carbon content, *Soil. Sci.*, 148, 389-403,doi: 10.1097/00010694-  
700 198912000-00001, 1989.

Vereecken, H., Weynants, M., Javaux, M., Pachepsky, Y., Schaap, M., and Genuchten, M. T.: Using  
pedotransfer functions to estimate the van Genuchten–Mualem soil hydraulic properties: a review, *V. Z.  
J.*, 9, 795-820,doi: 10.2136/vzj2010.0045 2010.

705 Wang, T., Wedin, D., and Zlotnik, V. A.: Field evidence of a negative correlation between saturated  
hydraulic conductivity and soil carbon in a sandy soil, *Water. Resour. Res.*, 45,doi:  
10.1029/2008wr006865, 2009.

Weynants, M., Vereecken, H., and Javaux, M.: Revisiting Vereecken pedotransfer functions: Introducing  
a closed-form hydraulic model, *V. Z. J.*, 8, 86-95,doi: 10.2136/vzj2008.0062, 2009.

710 Wösten, J., Lilly, A., Nemes, A., and Le Bas, C.: Development and use of a database of hydraulic  
properties of European soils, *Geoderma.*, 90, 169-185,doi: 10.1016/S0016-7061(98)00132-3, 1999.

Wu, W., and Wang, S. S.: Formulas for sediment porosity and settling velocity, *J. Hydraul. Eng.*, 132, 858-  
862,doi: 10.1061/ASCE0733-9429, 2006.

Yang, K., Ye, B., Zhou, D., Wu, B., Foken, T., Qin, J., and Zhou, Z.: Response of hydrological cycle to recent  
climate changes in the Tibetan Plateau, *Climatic change*, 109, 517-534, 2011.

715 Yang, K., Qin, J., Zhao, L., Chen, Y., Tang, W., Han, M., Chen, Z., Lv, N., Ding, B., and Wu, H.: A multiscale  
soil moisture and freeze-thaw monitoring network on the third pole, *Bull. Amer. Meteor. Soc.*, 94, 1907-  
1916, 2013.

Yang, K., Wu, H., Qin, J., Lin, C., Tang, W., and Chen, Y.: Recent climate changes over the Tibetan Plateau  
and their impacts on energy and water cycle: A review, *Global and Planetary Change*, 112, 79-91, 2014.

720 Yang, K., Zhu, L., Chen, Y., Zhao, L., Qin, J., Lu, H., Tang, W., Han, M., Ding, B., and Fang, N.: Land surface  
model calibration through microwave data assimilation for improving soil moisture simulations, *J.  
Hydrol.*, 533, 266-276,doi: 10.1016/j.jhydrol.2015.12.018, 2016.

Yao, T., Thompson, L. G., Mosbrugger, V., Zhang, F., Ma, Y., Luo, T., Xu, B., Yang, X., Joswiak, D. R., and  
Wang, W.: Third pole environment (TPE), *Environ. Dev.*, 3, 52-64,doi: 10.1016/j.envdev.2012.04.002,  
725 2012.

Zeng, Y., Su, Z., Wan, L., Yang, Z., Zhang, T., Tian, H., Shi, X., Wang, X., and Cao, W.: Diurnal pattern of the  
drying front in desert and its application for determining the effective infiltration, *Hydrol. Earth Syst.  
Sci.*, 13, 703,doi: 10.5194/hess-13-703-2009, 2009a.

730 Zeng, Y., Wan, L., Su, Z., Saito, H., Huang, K., and Wang, X.: Diurnal soil water dynamics in the shallow  
vadose zone (field site of China University of Geosciences, China), *Environ. Geol.*, 58, 11-23,doi:  
10.1007/s00254-008-1485-8, 2009b.

- Zeng, Y., Su, Z., Wan, L., and Wen, J.: A simulation analysis of the advective effect on evaporation using a two - phase heat and mass flow model, *Water. Resour. Res.*, 47,doi: 10.1029/2011WR010701, 2011a.
- 735 Zeng, Y., Su, Z., Wan, L., and Wen, J.: Numerical analysis of air - water - heat flow in unsaturated soil: Is it necessary to consider airflow in land surface models?, *J. Geophys. Res. Atmos.*, 116,doi: 10.1029/2011JD015835, 2011b.
- Zeng, Y., and Su, Z.: Reply to comment by Binayak P. Mohanty and Zhenlei Yang on "A simulation analysis of the advective effect on evaporation using a two - phase heat and mass flow model", *Water. Resour. Res.*, 49, 7836-7840;,doi: 10.1002/2013WR013764, 2013.
- 740 Zeng, Y., Su, Z., van der Velde, R., Wang, L., Xu, K., Wang, X., and Wen, J.: Blending Satellite Observed, Model Simulated, and in Situ Measured Soil Moisture over Tibetan Plateau, *Remote. Sens.*, 8, 268,doi: 10.3390/rs8030268, 2016.
- Zhang, Y., and Schaap, M. G.: Weighted recalibration of the Rosetta pedotransfer model with improved estimates of hydraulic parameter distributions and summary statistics (Rosetta3), *J. Hydrol.*, 547, 39-53,doi: 10.1016/j.jhydrol.2017.01.004, 2017.
- 745 Zhang, Z. F., Ward, A. L., and Keller, J. m.: Determining the Porosity and Saturated Hydraulic Conductivity of Binary Mixtures, *V. Z. J.*, 10, 313,doi: 10.2136/vzj2009.0138, 2011.
- Zheng, D., van der Velde, R., Su, Z., Wang, X., Wen, J., Booij, M. J., Hoekstra, A. Y., and Chen, Y.: Augmentations to the Noah model physics for application to the Yellow River source area. Part II: 750 Turbulent heat fluxes and soil heat transport, *J. Hydrometeorol.*, 16, 2677-2694,doi: 10.1175/JHM-D-14-0199.1, 2015.

**Table 1 Sampling approach for soil basic properties, SHP and STP over the Tibet-Obs**

| Sampling Approach     | Soil Texture | Gravel Content | Soil Organic Content | Dry bulk density | Porosity | Thermal Conductivity | Soil Water Retention Curve | Hydraulic Conductivity | Sampling Depths |      |       |
|-----------------------|--------------|----------------|----------------------|------------------|----------|----------------------|----------------------------|------------------------|-----------------|------|-------|
|                       |              |                |                      |                  |          |                      |                            |                        | Maqu            | Naqu | Ngari |
| Plastic bag           | √            | √              | √                    |                  |          |                      |                            |                        | 5cm             | 5cm  | 5cm   |
| Standard sample rings |              |                |                      | √                | √        | √                    |                            |                        | 10cm            | 10cm | 10cm  |
| Small sample rings    |              |                |                      |                  |          |                      | √                          |                        | 20cm            | 20cm | 20cm  |
|                       |              |                |                      |                  |          |                      |                            |                        | 40cm            | 40cm | 40cm  |
|                       |              |                |                      |                  |          |                      |                            |                        | 80cm            | 50cm |       |
| Profile Auger         |              |                |                      |                  |          |                      |                            | √                      | 10cm            | 10cm | 10cm  |
|                       |              |                |                      |                  |          |                      |                            |                        | 20cm            | 20cm | 20cm  |
|                       |              |                |                      |                  |          |                      |                            |                        | 40cm            | 40cm | 40cm  |
|                       |              |                |                      |                  |          |                      |                            |                        | 80cm            | 50cm |       |

755

**Table 2 Pressure-cell determined parameters of the CH and VG models for the three climate zones. The scaling method used for the determination is Eq. A15 in the Appendix.**

| Region           | Depth |           | CH     |                                  |                                  |                                  |                                  |                                  | VG               |      |                                  |                                  |
|------------------|-------|-----------|--------|----------------------------------|----------------------------------|----------------------------------|----------------------------------|----------------------------------|------------------|------|----------------------------------|----------------------------------|
|                  | (cm)  | $\lambda$ | $\psi$ | $\theta_s$                       | FC                               | PWP                              | $\theta_r$                       | $\theta_s$                       | $\alpha$         | n    | FC                               | PWP                              |
|                  |       | -         | cm     | cm <sup>3</sup> cm <sup>-3</sup> | cm <sup>3</sup> cm <sup>-3</sup> | cm <sup>3</sup> cm <sup>-3</sup> | cm <sup>3</sup> cm <sup>-3</sup> | cm <sup>3</sup> cm <sup>-3</sup> | cm <sup>-1</sup> | -    | cm <sup>3</sup> cm <sup>-3</sup> | cm <sup>3</sup> cm <sup>-3</sup> |
| Ngari (arid)     | 5     | 0.19      | 4.35   | 0.30                             | 0.21                             | 0.10                             | 0.03                             | 0.25                             | 0.02             | 1.39 | 0.22                             | 0.09                             |
|                  | 10    | 0.16      | 5.83   | 0.32                             | 0.24                             | 0.13                             | 0.03                             | 0.29                             | 0.02             | 1.31 | 0.26                             | 0.12                             |
|                  | 20    | 0.16      | 2.02   | 0.27                             | 0.17                             | 0.09                             | 0.03                             | 0.20                             | 0.02             | 1.34 | 0.18                             | 0.08                             |
|                  | 40    | 0.18      | 2.45   | 0.28                             | 0.17                             | 0.09                             | 0.03                             | 0.21                             | 0.03             | 1.37 | 0.18                             | 0.08                             |
| Naqu (semi-arid) | 5     | 0.07      | 0.02   | 0.51                             | 0.30                             | 0.23                             | 0.03                             | 0.33                             | 0.05             | 1.10 | 0.30                             | 0.23                             |
|                  | 10    | 0.10      | 11.21  | 0.43                             | 0.39                             | 0.27                             | 0.04                             | 0.44                             | 0.04             | 1.15 | 0.40                             | 0.25                             |
|                  | 20    | 0.16      | 4.59   | 0.39                             | 0.29                             | 0.15                             | 0.04                             | 0.35                             | 0.04             | 1.29 | 0.30                             | 0.14                             |
|                  | 40    | 0.13      | 1.64   | 0.39                             | 0.27                             | 0.16                             | 0.04                             | 0.30                             | 0.02             | 1.27 | 0.28                             | 0.14                             |
|                  | 50    | 0.19      | 0.58   | 0.39                             | 0.18                             | 0.09                             | 0.04                             | 0.23                             | 0.03             | 1.43 | 0.20                             | 0.08                             |
| Maqu (sub-humid) | 5     | 0.28      | 39.04  | 0.79                             | 0.75                             | 0.29                             | 0.05                             | 0.77                             | 0.02             | 1.33 | 0.61                             | 0.30                             |
|                  | 10    | 0.25      | 39.17  | 0.72                             | 0.70                             | 0.29                             | 0.05                             | 0.60                             | 0.01             | 1.27 | 0.58                             | 0.30                             |
|                  | 20    | 0.24      | 37.89  | 0.66                             | 0.65                             | 0.27                             | 0.05                             | 0.54                             | 0.01             | 1.25 | 0.53                             | 0.28                             |
|                  | 40    | 0.20      | 33.13  | 0.54                             | 0.53                             | 0.25                             | 0.05                             | 0.47                             | 0.01             | 1.23 | 0.45                             | 0.25                             |
|                  | 80    | 0.27      | 36.61  | 0.56                             | 0.56                             | 0.21                             | 0.05                             | 0.49                             | 0.01             | 1.31 | 0.49                             | 0.21                             |

760

**Table 3 Biases of  $\lambda$  estimates based on D63F, T16 and J75 schemes combined with the BD scheme in the profiles across the three climate zones and the measurements. Case 1 is the bias (listed in the upper part of the table) derived from schemes not considering gravel impact parameterization for the arid and semi-arid**

zone or SOC impact parameterization for the sub-humid zone. Case 2 is the bias (listed in the lower part of the table) with these parameterizations taken into consideration. The unit of listed value is  $\text{W m}^{-1} \text{K}^{-1}$ .

| Schemes | Ngari (arid) |       |       |       | Naqu (semi-arid) |       |       |       |       | Maqu (sub-humid) |       |       |       |       |
|---------|--------------|-------|-------|-------|------------------|-------|-------|-------|-------|------------------|-------|-------|-------|-------|
|         | 5 cm         | 10 cm | 20 cm | 40 cm | 5 cm             | 10 cm | 20 cm | 40 cm | 50 cm | 5 cm             | 10 cm | 20 cm | 40 cm | 80 cm |
| D63F    | 0.06         | 0.18  | 0.02  | -0.01 | 0.09             | -0.02 | -0.03 | 0.01  | 0.20  | 0.01             | -0.04 | -0.06 | -0.05 | -0.08 |
| T16     | 0.30         | 0.32  | 0.30  | 0.07  | 0.02             | 0.25  | 0.31  | 0.54  | 0.99  | 0.05             | 0.10  | 0.18  | 0.23  | 0.20  |
| J75     | 0.26         | -0.24 | -0.42 | -0.37 | 0.38             | -0.21 | -0.35 | -0.35 | -0.23 | 0.13             | -0.20 | -0.29 | -0.32 | -0.37 |
| D63F    | 0.00         | 0.08  | -0.13 | -0.14 | 0.20             | -0.11 | -0.16 | -0.26 | -0.20 | 0.14             | -0.19 | -0.22 | -0.13 | -0.12 |
| T16     | 0.26         | 0.25  | 0.18  | -0.02 | 0.13             | 0.18  | 0.20  | 0.27  | 0.44  | 0.16             | -0.16 | -0.14 | 0.01  | 0.00  |
| J75     | 0.29         | -0.23 | -0.43 | -0.39 | 0.34             | -0.28 | -0.43 | -0.53 | -0.49 | 0.22             | -0.31 | -0.41 | -0.41 | -0.45 |

765

**Table 4 Comparisons of mean derived  $K_s$  from the applicable PTFs for the CH and VG models based on various soil datasets, with the measurements. The unit of listed value is m/s.**

| Region           |    | Measured | Tibet-Obs | FAO-UNESCO | HWSD     | BNU      | SoilGrid1km | SoilGrid250m | HPSS     |
|------------------|----|----------|-----------|------------|----------|----------|-------------|--------------|----------|
| Ngari (arid)     | CH | 2.53E-05 | 1.81E-05  | 7.16E-06   | 5.74E-06 | 4.92E-06 | 7.51E-06    | 7.29E-06     |          |
|                  | VG | 2.53E-05 | 2.41E-05  | 6.09E-06   | 4.14E-06 | 4.26E-06 | 4.96E-06    | 6.95E-06     | 7.42E-06 |
| Naqu (semi-arid) | CH | 2.50E-05 | 1.49E-05  | 7.05E-06   | 7.98E-06 | 7.91E-06 | 6.34E-06    | 6.22E-06     |          |
|                  | VG | 2.50E-05 | 2.38E-05  | 5.25E-06   | 5.39E-06 | 9.59E-06 | 5.84E-06    | 5.99E-06     | 6.65E-06 |
| Maqu (sub-humid) | CH | 4.21E-06 | 3.00E-06  | 7.05E-06   | 6.72E-06 | 3.91E-06 | 4.24E-06    | 3.97E-06     |          |
|                  | VG | 4.21E-06 | 1.65E-05  | 5.25E-06   | 4.85E-06 | 3.07E-06 | 5.62E-06    | 3.15E-06     | 4.33E-06 |

## Figures

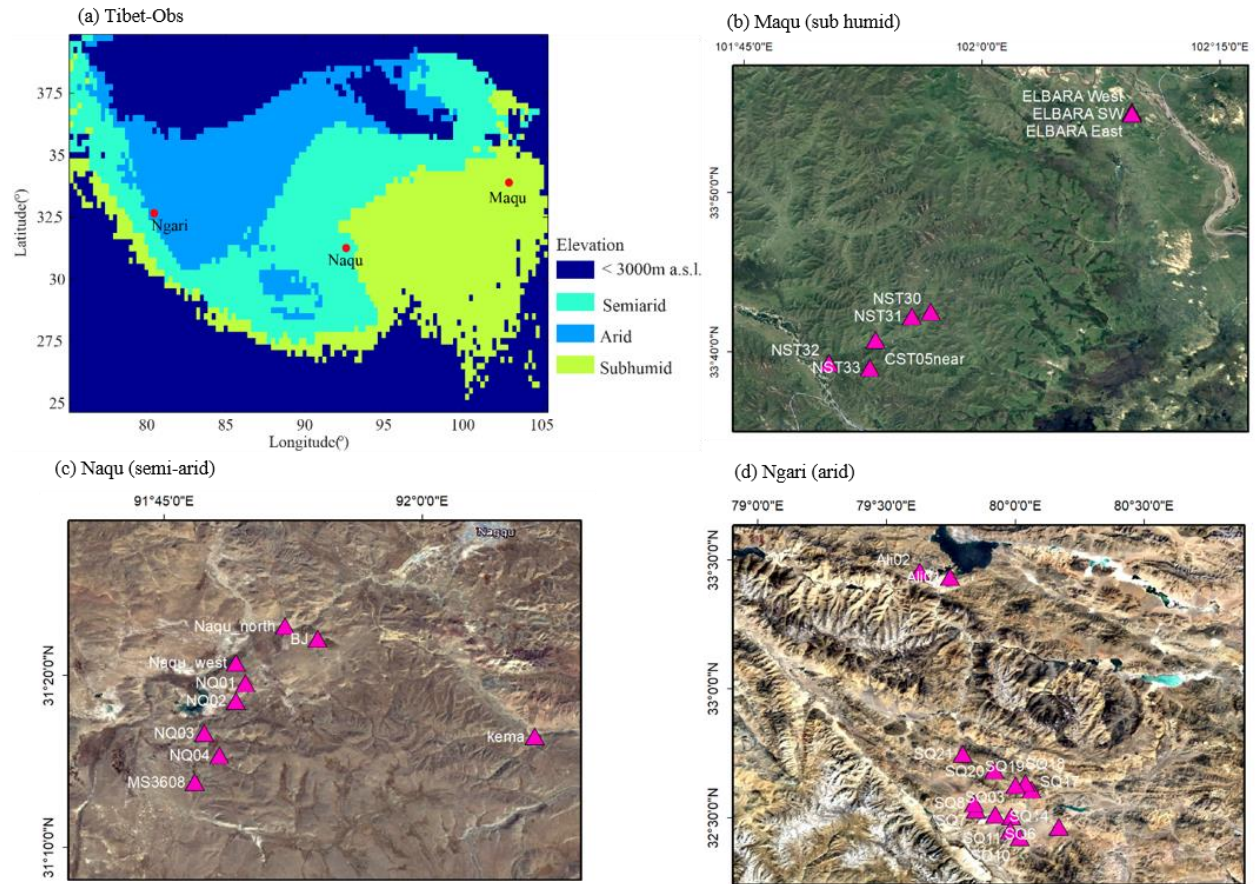

**Figure 1** The location of Tibet-Obs and the spatial distribution of soil sampling across three climate zones. (a) Tibet-Obs networks are distributed under the three different climatic zones where the zones were classified based on the FAO Aridity Index Map. The dark blue color represents the area around Tibetan Plateau, with elevation lower than 3000 m above sea level (a.s.l.) (Zeng et al. 2016). (b), (c) and (d) are samplings distribution in the Maqu network under the sub-humid zone, Naqu network under the semi-arid zone and Ngari network under the arid zone respectively, in the kml image from Google Earth. It is to note that the image acquisition-times were in August, February and December respectively. The triangle in ginger pink represents each sampling site.

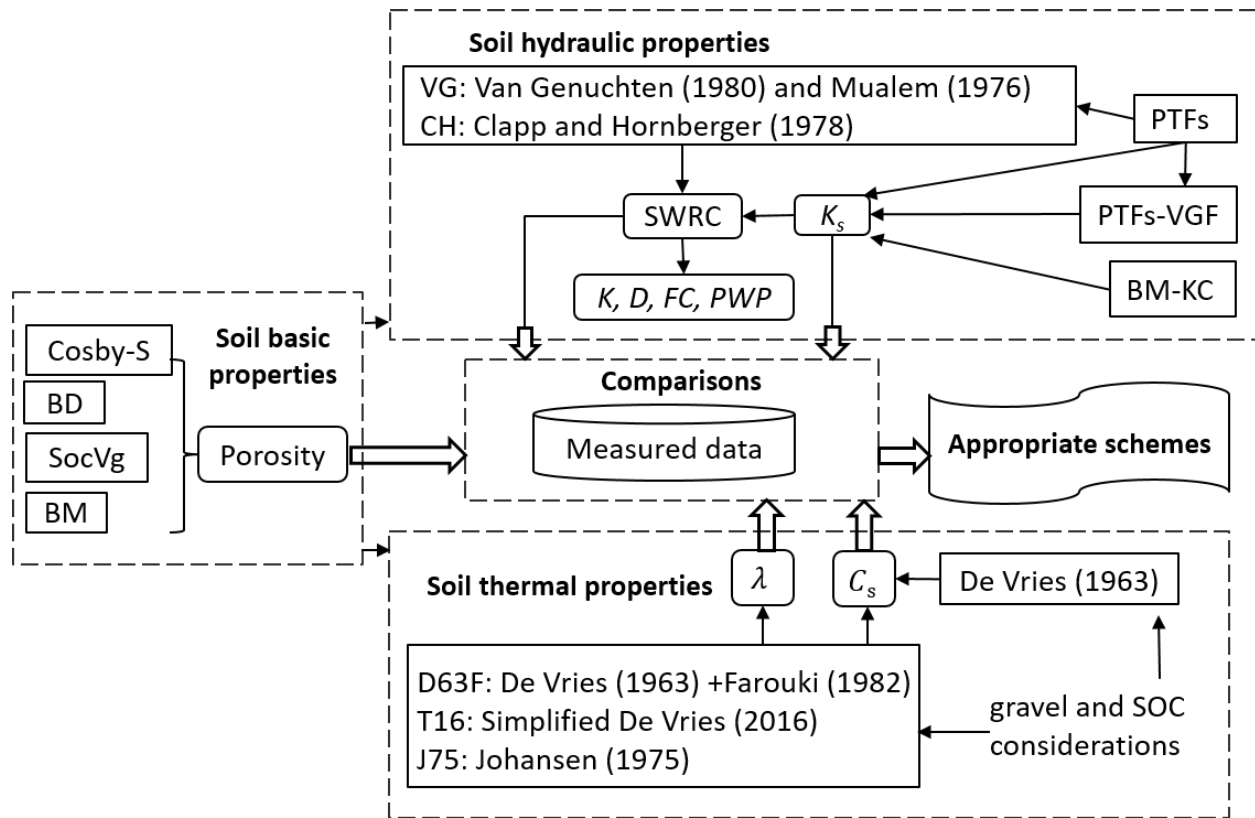

Figure 2 Flowchart depicting the implementation of different schemes of porosity and SHP/STP by using *in situ* basic soil properties data. Dashed boxes indicate various categories of parameterization schemes and the comparisons with the measurements. Block arrows show the main data flow for comparisons. Single arrows represent the steps that occur internally for each part or connect various parts. Rectangles represent schemes. Rounded rectangles denote porosity and SHP/STP parameters.  $K$  and  $D$  represent hydraulic conductivity and diffusivity, respectively.

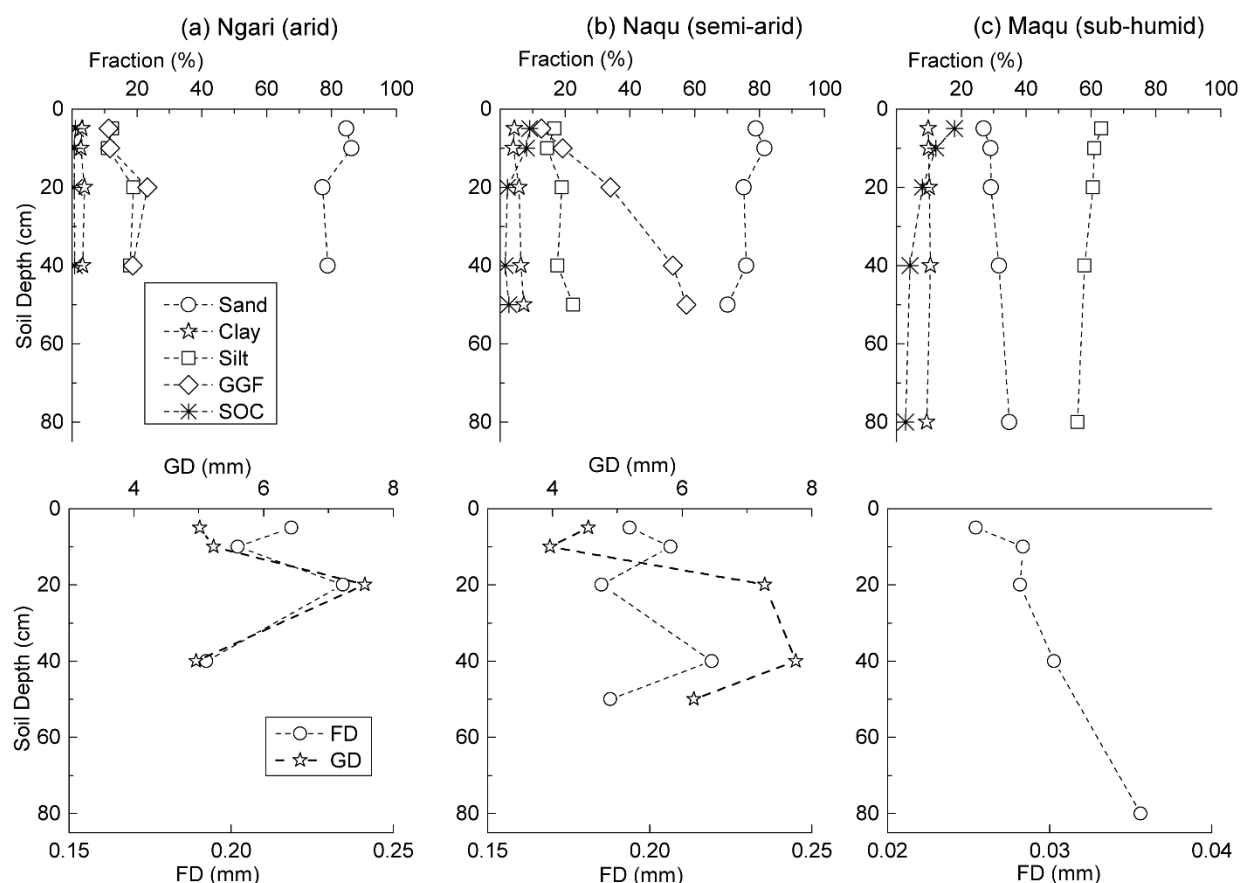

**Figure 3 Profiles of mean soil basic properties at three climate zones. Top panel: Variations in Sand, Clay, Silt, GGF, and SOC at various depths. Bottom panel: Variations in GD and FD at different depths. GGF is the gravimetric gravel fraction. SOC is the soil organic matter content. FD is the mean particle diameter of fine minerals. GD is the mean particle diameter of gravels.**

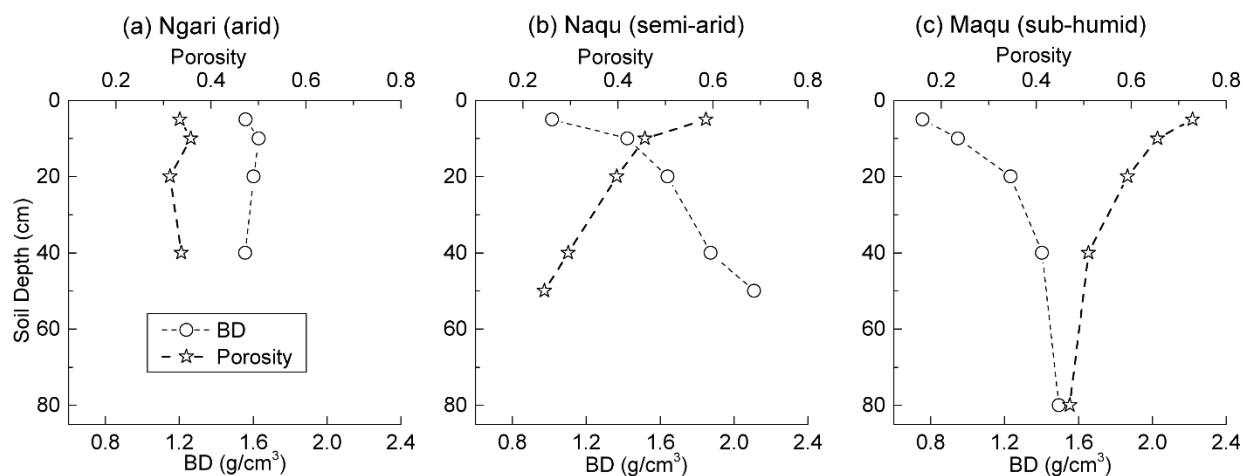

**Figure 4 Profiles of mean dry bulk density (BD) and porosity at three climate zones.**

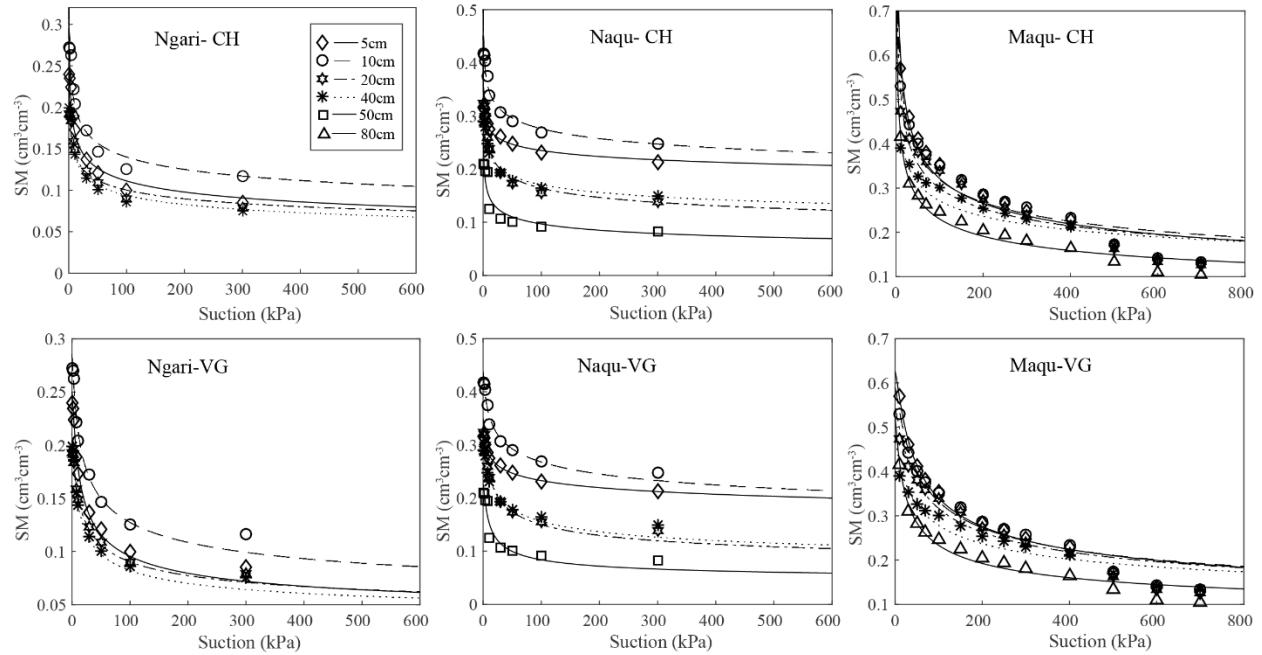

**Figure 5** Average observational SWRCs and determined SWRCs-CH and SWRCs-VG from scaling method at different depths under the three climate zones: Ngari in the arid zone, Naqu in the semi-arid zone and Maqu in the sub-humid zone. Dots denote average observed soil moisture content at specific suction. Lines represent determined SWRCs-CH and SWRCs-VG.

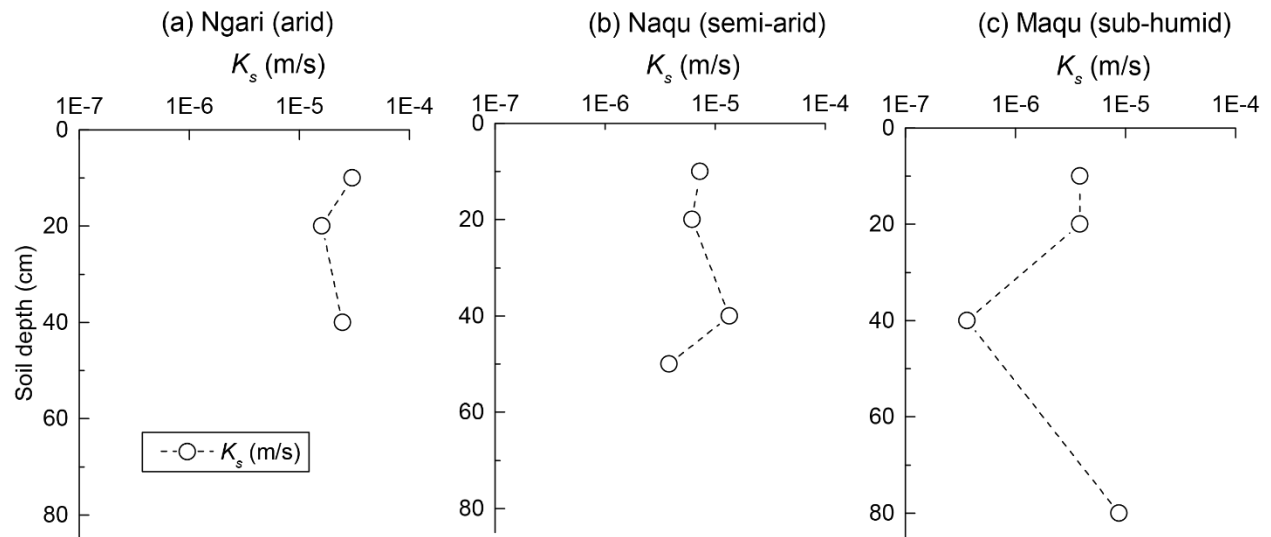

**Figure 6** Profiles of mean saturated hydraulic conductivity ( $K_s$ ) at three different climate zones.



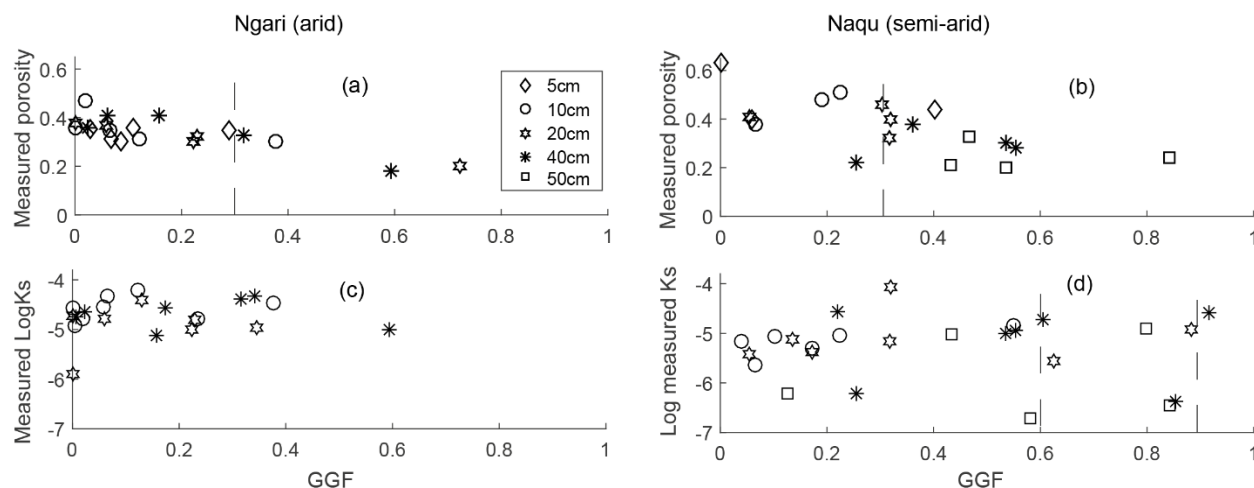

**Figure 7** Scatter points of measured porosities (Top panel) and  $K_s$  (Bottom panel) with GGF varying at profile in the arid and semi-arid zones.

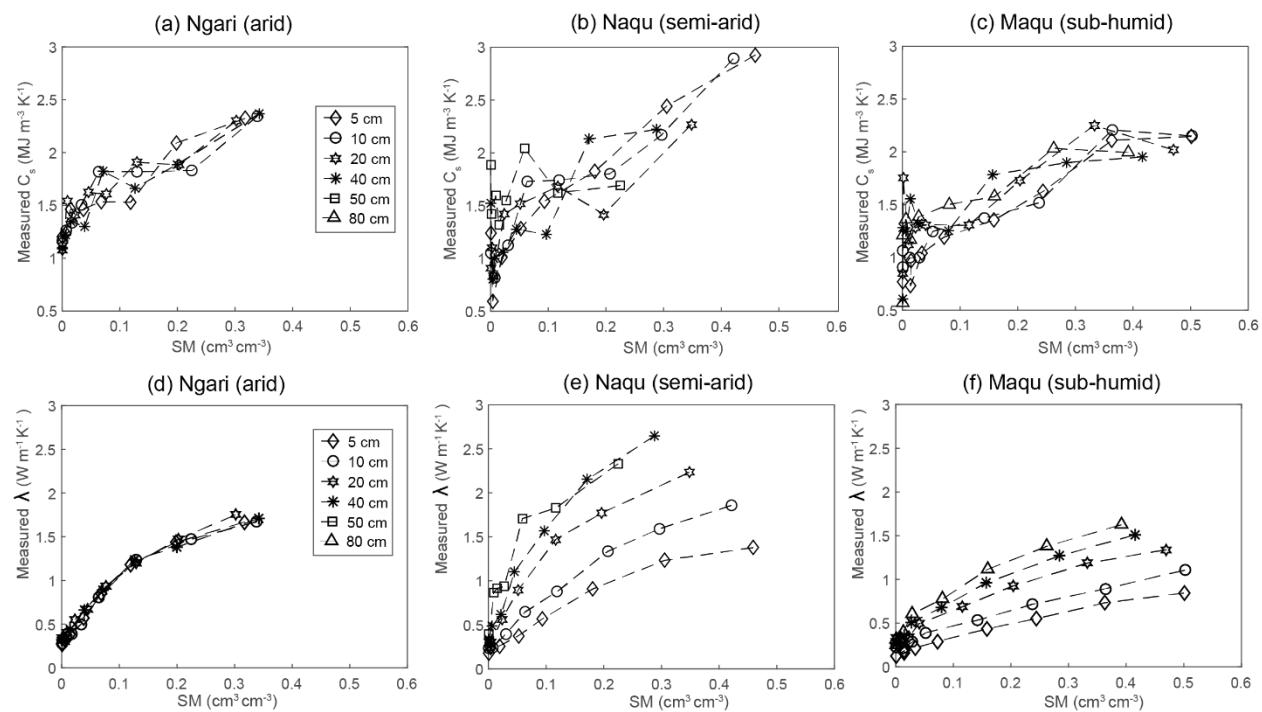

**Figure 8** Mean soil heat capacity ( $C_s$ ) and thermal conductivities ( $\lambda$ ) with varying water content (SM) at different depths in three climate zones.

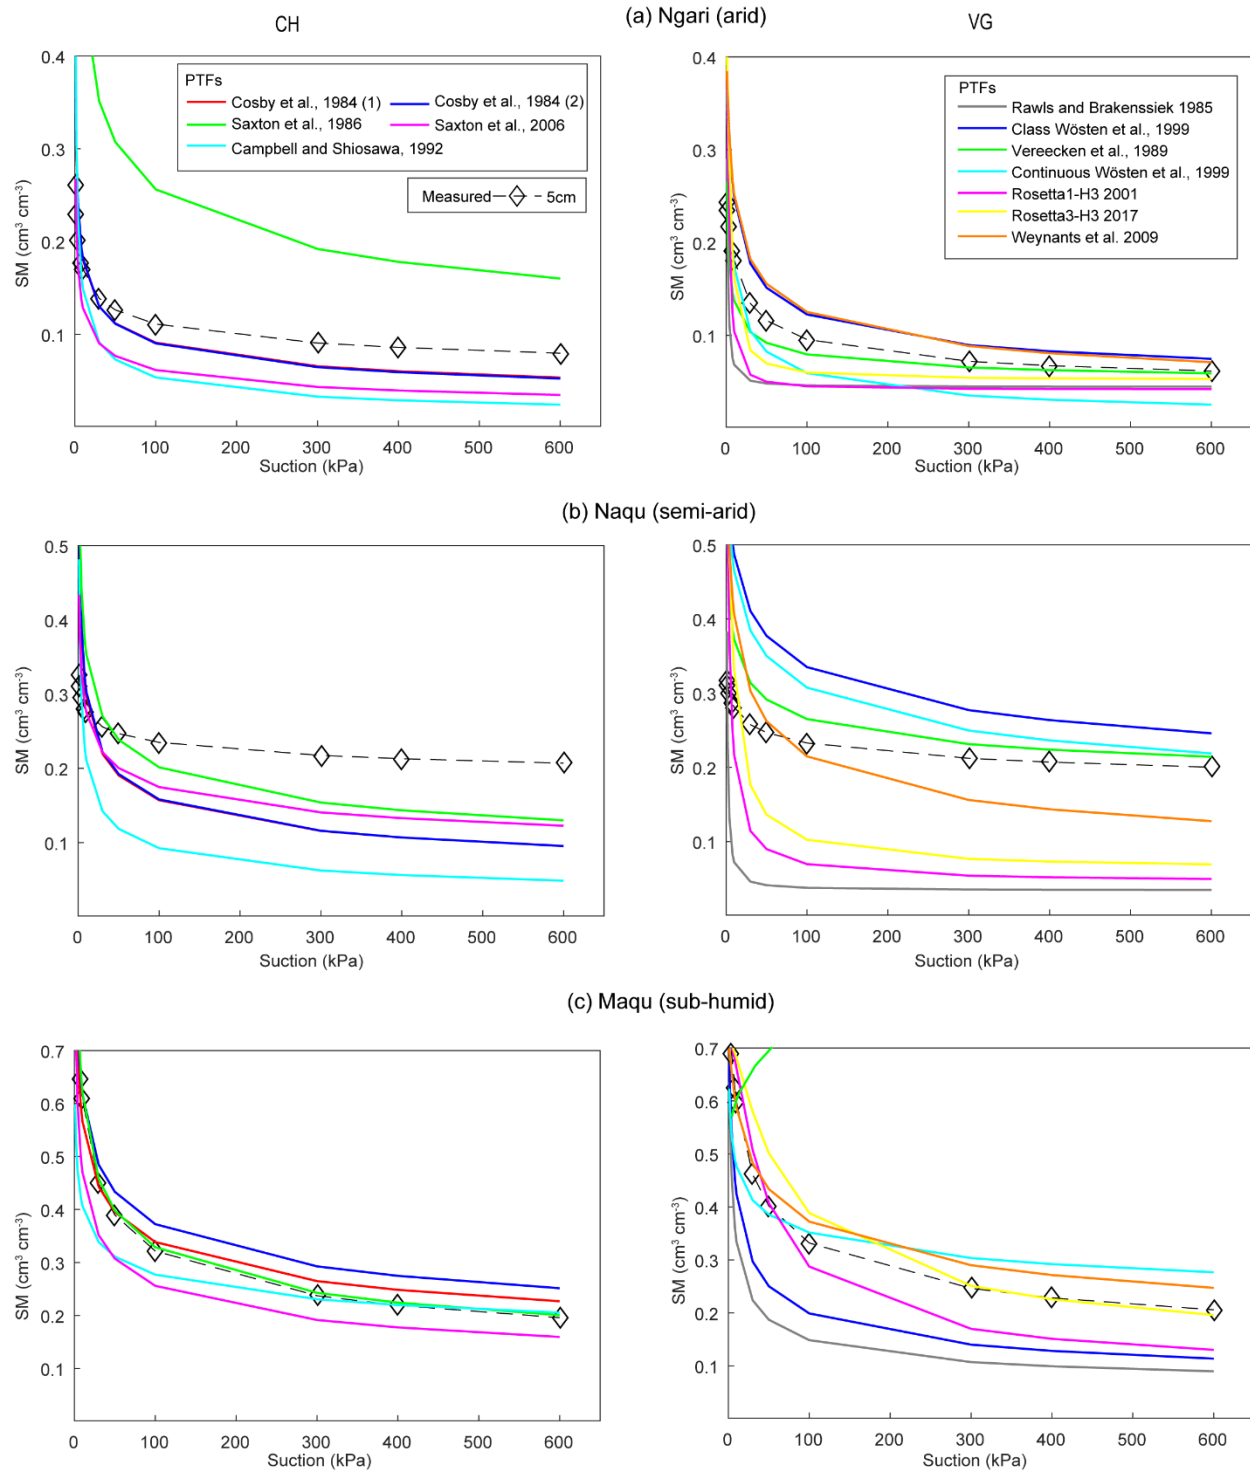

815 **Figure 9** Comparisons between estimated SWRCs from PTFs combined with the BD scheme, and the measurement determined SWRCs at 5 cm for three climate zones. The broken green line in the right-hand figure of (c) denotes SM at > 100 kPa being above  $0.7 \text{ cm}^3 \text{cm}^{-3}$ .

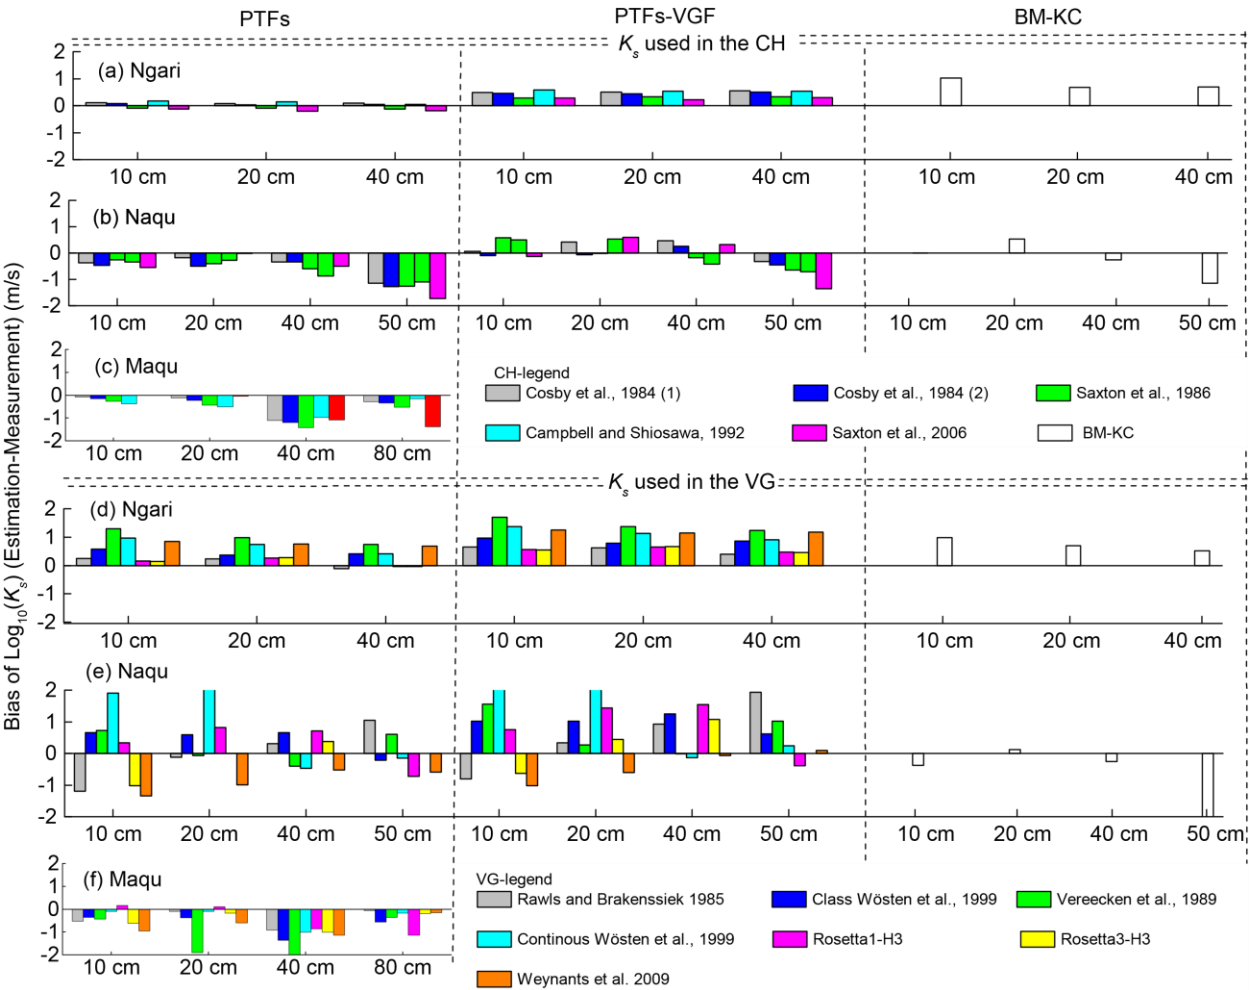

**Figure 10 Comparisons of  $K_s$ , derived from PTFs, PTFs-VGF and BM-KC schemes in the CH and VG models, with field measurements in the profile over three climate zones.**

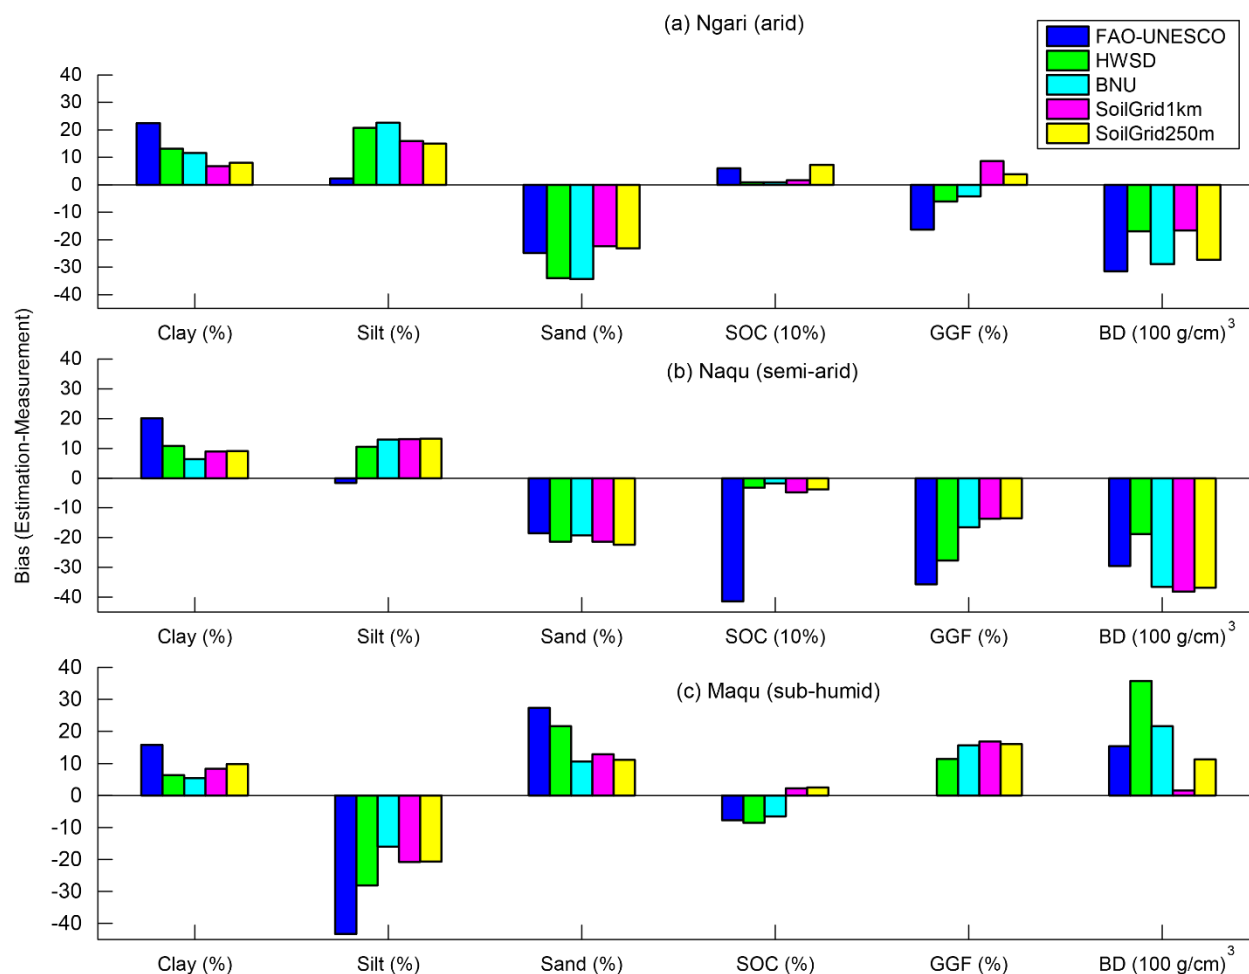

**Figure 11** Average bias in soil basic properties between the existing products and the laboratory measurements taken for the three climate zones. To enable the comparison of BD with the same order of magnitude as other properties, the original BD was multiplied by 100 (with unit  $\times 100 \text{ g/cm}^3$ ). Likewise, a multiplication ( $\% \times 10$ ) is applied to SOC data on the semi-arid zone. FAO-UNESCO is the FAO-UNESCO Soil Map of the World (2007). HWSD is the Harmonized World Soil Database (FAO/IIASA/ISRIC/ISSCAS/JR, 2012). BNU is a Chinese data set of soil properties (Shangguan et al., 2012; Shangguan et al., 2013) and soil hydraulic parameters using PTFs (Dai et al., 2013) released by Beijing Normal University. SoilGrids1km” (Hengl et al., 2014) and the updated version of SoilGrids250m (Hengl, 2017) datasets are released by the International Soil Reference and Information Center (ISRIC) - WoSIS institute. HPSS is the hydraulic parameters of the Van Genuchten (1980)-Mualem (1976) model based on SoilGrids1km and Schaap et al. (2001) PTFs (Montzka et al., 2017).

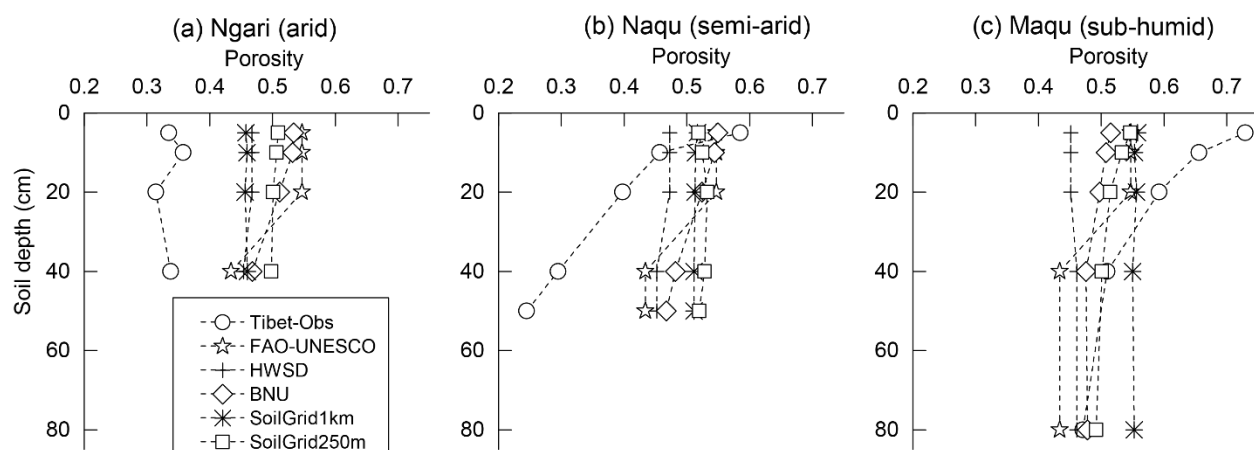

**Figure 12** Comparisons between the porosity estimated from various existing datasets based on BD scheme, and the *in situ* measurements.

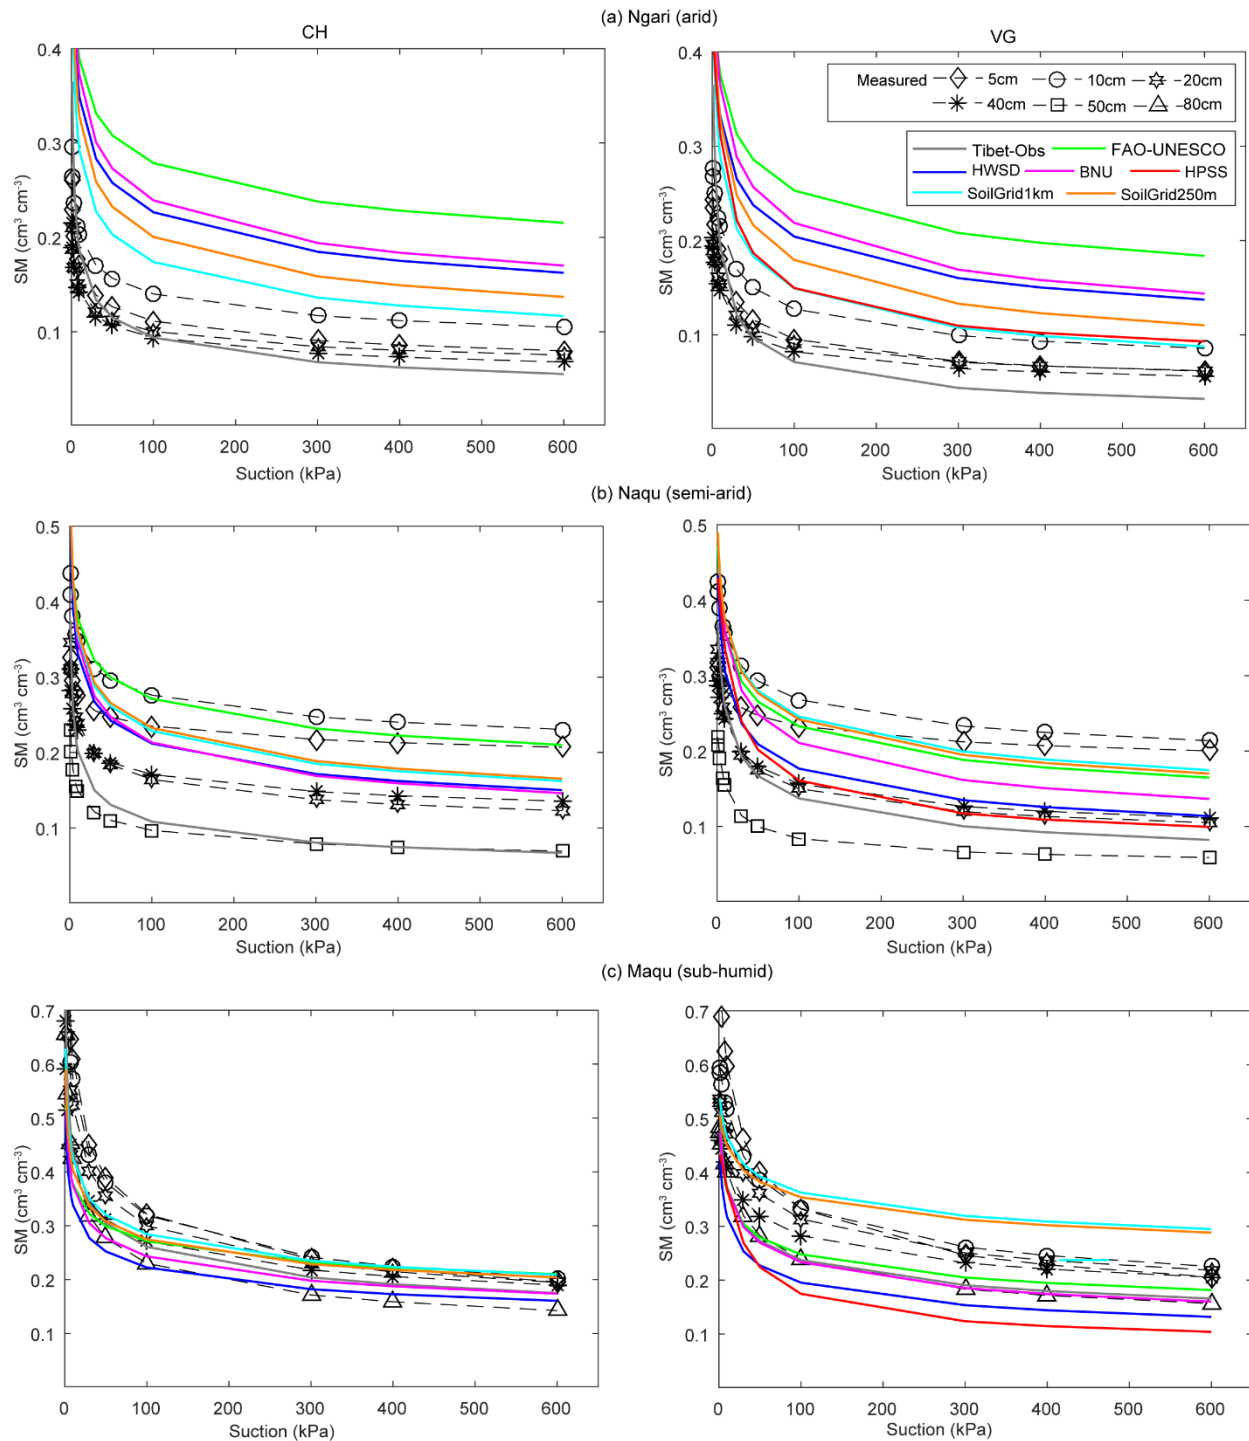

845 **Figure 13 Comparisons of SWRCs, derived from the applicable PTFs based on various datasets, with laboratory measurements. The left panels represent the SWRCs by the CH model based on six datasets. The right-hand panels represent the SWRCs by the VG model based on seven datasets, in which HPSS only provides hydraulic parameters for the VG model.**



## Appendix

### A.1 Porosity scheme

#### Cosby-S scheme (univariate)

Cosby et al. (1984) PTF is used to obtain porosity from sand percentage in soil texture:

$$\phi = 0.489 - 0.001268 \times (\%sand) \quad (A1)$$

where  $\phi$  is the soil porosity,  $\%sand$  is the sand proportion of the soil sample.

#### BD scheme

BD scheme for porosity calculation (Hillel, 2003) is as follows:

$$\phi = 1 - \frac{\rho_b}{\rho_s} \quad (A2)$$

where  $\rho_b$  is the dry bulk density (g/cm<sup>3</sup>).  $\rho_s$  is the mineral particle density valued at 2.65g/cm<sup>3</sup>. For soil mixture, BD scheme assumed that the coarse and fine components share the same particle density.

#### SocVg scheme

Regarding soils as a mixture of organic and fine minerals, Chen et al. (2012) conceptualized porosity as shown in Eq. (A3). Through the determination of volumetric SOC, the gravel impact was taken into account (Eq. (A4-A5)) and assumed to be equal to the impact from sand particles. The effective sand proportion was equal to Eq. (A6).

$$\phi_m = (1 - V_{soc})\phi_F + V_{soc}\phi_{soc,sat} \quad (A3)$$

$$V_{soc} = \frac{\rho_s(1-\phi_F)m_{soc}}{\rho_{soc}(1-m_{soc})+\rho_s(1-\phi_F)m_{soc}+(1-\phi_F)\frac{\rho_{soc}GGF}{(1-GGF)}} \quad (A4)$$

$$VGF = \frac{\rho_{soc}(1-\phi_F)GGF}{(1-GGF)(\rho_{soc}(1-m_{soc})+\rho_s(1-\phi_F)m_{soc}+(1-\phi_F)\frac{\rho_{soc}GGF}{(1-GGF)})} \quad (A5)$$

$$\%sand_e = \%sand * (1 - VGF) + VGF \quad (A6)$$

where  $\phi_m$  is the porosity of soil mixture.  $V_{soc}$  and  $VGF$  are the volumetric fractions of SOC and gravel, respectively.  $\phi_F$  is the porosity of fine components and was calculated by using Eq. (A1), where  $\%sand$  was obtained from Eq. (A6).  $GGF$  and  $m_{soc}$  are the gravimetric fractions of gravels and SOC, respectively.  $\rho_{soc}=0.13$  g/cm<sup>3</sup> is the BD of peat.  $\phi_{soc,sat}=0.9$  is the porosity of peat.

#### Binary mixture (BM) scheme

Zhang et al. (2011) proposed a mixing-coefficient model to estimate the porosity for binary mixtures:

$$\phi_m = \begin{cases} (VGF - \beta_m * VGF + \beta_m)\phi_g + VFF * \phi_F - \beta_m * VFF & \text{if } VFF < \phi_g \\ (1 - \beta_m) * VGF * \phi_g + VFF * \phi_F & \text{if } VFF \geq \phi_g \end{cases} \quad (A7)$$

where  $VFF$  is the component fraction by volume for fine minerals.  $VGF$  can be determined using Eq. (A8).  $\phi_F$  is defined as in the SocVg scheme.  $\phi_g$  is the porosity for gravels, which is mainly affected by median grain size (Frings et al., 2011). In this study,  $\phi_g$  was calculated by using empirical Eq. (A9) given by Wu and Wang (2006).  $\beta_m$  is the mixing coefficient related with grain size (Eq. (A10)).

$$VGF = \frac{GGF(1-\phi_F)}{GGF(1-\phi_F)+(1-GGF)(1-\phi_g)} \quad (A8)$$

$$\phi_g = 0.13 + \frac{0.21}{(GD+0.002)^{0.21}} \quad (A9)$$



885

$$\beta_m = \begin{cases} 0.0363 \frac{GD}{FD} + 0.2326 & \text{for } \frac{GD}{FD} \leq 21 \\ 1 & \text{for } \frac{GD}{FD} > 21 \end{cases} \quad (\text{A10})$$

where  $GD$  and  $FD$  are the mean grain size for gravels and fine minerals, respectively, and the unit is mm.

### A.2 Soil water retention curve (SWRC)

The function of Clapp and Hornberger (1978) (i.e. CH) for soil water retention is written as:

$$\varphi = \varphi_s (\theta / \theta_s)^{-1/b} \quad \varphi \leq \varphi_i \quad (\text{A11})$$

890

where  $\varphi_s$  is the saturated capillary potential (cm).  $b$  is pore size distribution index (dimensionless).  $\theta$  is the SM ( $\text{cm}^3\text{cm}^{-3}$ ) and  $\theta_s$  is the saturated SM.  $\varphi_i$  defines an inflection point near saturation. The soil conductivity and diffusivity are written as:

$$\begin{cases} K(\theta) = K_s (\theta / \theta_s)^{3+2/b} \\ D(\theta) = D_s (\theta / \theta_s)^{2+1/b} \\ D_s = 1/b * K_s (\varphi_s / \theta_s) \end{cases} \quad (\text{A12})$$

895

where  $K$  and  $D$  are the soil hydraulic and thermal conductivity.  $K_s$  and  $D_s$  are the saturated hydraulic conductivity (m/s) and diffusivity ( $\text{m}^2/\text{s}$ ).

The van Genuchten (1980) and Mualem (1976) (i.e. VG) model provides the water retention curve as Eq. (A13) shows,

$$\theta(h) = \theta_r + \frac{\theta_s - \theta_r}{(1 + (ah)^n)^{1-1/n}} = f(h, \theta_r, \theta_s, \alpha, n) \quad (\text{A13})$$

900

where  $\theta(h)$  is the SM ( $\text{cm}^3\text{cm}^{-3}$ ) at pressure head  $h$  (cm).  $\theta_r$  is the residual SM ( $\text{cm}^3\text{cm}^{-3}$ ).  $\theta_s$  has the same meaning as above.  $\alpha$  is the inverse of air entry value ( $\text{cm}^{-1}$ ).  $n$  is the shape parameter (dimensionless). The soil conductivity and diffusivity are written as:

$$\Theta = \frac{\theta - \theta_r}{\theta_s - \theta_r}$$

$$K = K_s \Theta^{1/2} [1 - (1 - \Theta^{1/(1-1/n)})^{1-1/n}]^2 \quad (\text{A14})$$

$$D(\Theta) = \frac{(1-m)K_s}{\alpha m(\theta_s - \theta_r)} \Theta^{1/2-1/m} [(1 - \Theta^{1/m})^{-m} + (1 - \Theta^{1/m})^m - 2]$$

905

$$m = 1 - 1/n$$

where  $\Theta$  is the effective saturation.

Based on measured soil water potential and SM, we adopted the scaling method proposed by Montzka et al. (2017) to estimate hydraulic parameters in the CH and VG models. The expected-scale (representative) parameters of  $(\widehat{\theta_s}, \widehat{b}, \widehat{\varphi_s})$  and  $(\widehat{\theta_r}, \widehat{\theta_s}, \widehat{\alpha}, \widehat{n})$  in the water retention curves of  $f(h, \theta_s, b, \varphi_s)$  and  $f(h, \theta_r, \theta_s, \alpha, n)$  that minimize the sum of squares of the deviations for all respective observations  $i = 1 \dots N$  (Eq. (A15)) need to be obtained. The parameter fitting algorithm was the damped least-squares method of Levenberg-Marquardt (Marquardt, 1963). The initial values were taken from the mean of  $(\theta_s, \alpha, n)$  and  $(\theta_r, \theta_s, \alpha, n)$  at each observation.

910

$$(\widehat{\theta_s}, \widehat{b}, \widehat{\varphi_s}) = \text{argmin} \sum_{i=1}^N [\theta_i - f(h, \theta_{s,i}, b_i, \varphi_{s,i})]^2$$

$$(\widehat{\theta_r}, \widehat{\theta_s}, \widehat{\alpha}, \widehat{n}) = \text{argmin} \sum_{i=1}^N [\theta_i - f(h, \theta_{r,i}, \theta_{s,i}, \alpha_i, n_i)]^2 \quad (\text{A15})$$

915

### A.3 PTFs for SWRC

Various PTFs have been developed to determine soil hydraulic properties. In terms of criterions described in Dai et al. (2013), five PTFs (No. 1-5 in Table A1) were selected for estimating parameters of  $(\theta_s, \varphi_s, b)$  in the CH model as well as seven PTFs (No. 6-12 in Table A1) for the parameters of  $(\theta_r, \theta_s, \alpha, n)$  in the VG model.

Table A1 List of PTFs for estimating soil water retention curve.

| #  | PTF                            | Retention<br>/<br>$K_s$ model | Sand<br>/<br>% | Silt<br>/<br>% | Clay<br>/<br>% | Organic<br>Carbon<br>/<br>% | Dry bulk<br>density<br>/<br>$\text{g cm}^{-3}$ | Depth<br>/<br>- |
|----|--------------------------------|-------------------------------|----------------|----------------|----------------|-----------------------------|------------------------------------------------|-----------------|
| 1  | Cosby et al., 1984 (1)         | CH, $K_s^1$                   | ✓              |                | ✓              |                             |                                                |                 |
| 2  | Cosby et al., 1984 (2)         | CH, $K_s^2$                   | ✓              | ✓              | ✓              |                             |                                                |                 |
| 3  | Saxton et al., 1986            | CH, $K_s^3$                   | ✓              |                | ✓              | ✓                           |                                                |                 |
| 4  | Campbell and Shiosawa, 1992    | CH, $K_s^4$                   | ✓              | ✓              | ✓              |                             | ✓                                              |                 |
| 5  | Saxton et al., 2006            | CH, $K_s^5$                   | ✓              |                | ✓              | ✓                           |                                                |                 |
| 6  | Rawls and Brakensiek 1985      | VG, $K_s^6$                   | ✓              |                | ✓              |                             | ✓                                              |                 |
| 7  | Class Wösten et al., 1999      | VG, $K_s^7$                   | ✓              | ✓              | ✓              |                             |                                                | ✓               |
| 8  | Vereecken et al., 1989         | VG, $K_s^8$                   | ✓              |                | ✓              | ✓                           | ✓                                              |                 |
| 9  | Continuous Wösten et al., 1999 | VG, $K_s^9$                   |                | ✓              | ✓              | ✓                           | ✓                                              | ✓               |
| 10 | Rosetta1-H3                    | VG, $K_s^{10}$                | ✓              | ✓              | ✓              |                             | ✓                                              |                 |
| 11 | Rosetta3-H3                    | VG, $K_s^{11}$                | ✓              | ✓              | ✓              |                             | ✓                                              |                 |
| 12 | Weynants et al. 2009           | VG, $K_s^{12}$                | ✓              |                | ✓              | ✓                           | ✓                                              |                 |

where 10 and 11 were cited by Schaap et al. (2001) and Zhang and Schaap (2017), respectively.

#### A.4 Saturated hydraulic conductivity scheme

##### PTFs-VGF scheme

The PTF-VGF scheme estimated  $K_s$  of soil mixtures (Peck and Watson, 1979) as follows:

$$K_{sm} = K_{sat,f} \frac{2(1-VGF)}{2+VGF} \quad (\text{A16})$$

<sup>1</sup>  $K_s = 60.96 * 10^{-0.884+0.0153*sand}$

<sup>2</sup>  $K_s = 60.96 * 10^{-0.6+0.0126*sand-0.0064*clay}$  (multi-variate)

<sup>3</sup>  $K_s = 24.0 \exp\{12.012 - 0.0755 * sand + [-3.895 + 0.03671 * sand - 0.1103 * clay + 0.00087546clay^2]/\theta_s\}$

<sup>4</sup>  $K_s = 339.0 * \left(\frac{1.3}{BD}\right)^{1.3b} \exp(-0.06888 * clay - 0.03638 * silt - 0.025)$

<sup>5</sup>  $\chi = 0.00251 * sand + 0.00195 * clay + 0.011 * SOC + 0.00006 * sand * SOC + 0.00027 * clay * SOC + 0.0000452 * sand * clay + 0.299$ ;  $K_s = 4632 * (\theta_s - y)^{3-b}$

<sup>6</sup>  $\theta_s = \phi = 1 - BD/2.65$ ;  $K_s = 24 \exp(19.52348 * \phi - 8.96847 - 0.028212 * clay + 0.00018107 * sand^2 - 0.0094125 * clay^2 - 8.395215 * \phi^2 + 0.077718 * sand * \phi - 0.00298 * sand^2 * \phi^2 - 0.019492 * clay^2 * \phi^2 + 0.0000173 * sand^2 * clay + 0.02733 * clay^2 * \phi + 0.001434 * sand^2 * \phi - 0.0000035 * sand * clay^2$ ;

<sup>7</sup> The  $K_s$  for the FAO textural classes Pachepsky, Y., and Rawls, W. J.: Development of pedotransfer functions in soil hydrology, Elsevier, 2004.

<sup>8</sup>  $\log(K_s) = 20.62 - 0.96 * \log(clay) - 0.66 * \log(sand) - 0.46 * \log(clay) - 8.43 * BD$

<sup>9</sup>  $K_s = \exp(7.75 + 0.0352 * silt + 0.93 * itop - 0.967 * BD^2 - 0.000484 * clay^2 - 0.000322 * silt^2 + 0.001/silt - 0.0748/SOC - 0.643 * \log(silt) - 0.01398 * BD * clay - 0.1673 * BD * SOC + 0.02986 * itop * clay - 0.03305 * itop * silt)$ , where topsoil is an ordinal variable having the value of 1 (depth 0–30 cm) or 0 (depth 30 cm).

<sup>10</sup> H3 hierarchical pedotransfer function in Schaap et al. (2001)

<sup>11</sup> Updated H3 hierarchical pedotransfer function in Zhang, Y., and Schaap, M. G.: Weighted recalibration of the Rosetta pedotransfer model with improved estimates of hydraulic parameter distributions and summary statistics (Rosetta3), J. Hydrol., 547, 39-53, doi: 10.1016/j.jhydrol.2017.01.004, 2017.

<sup>12</sup>  $K_s = \exp(1.9582 + 0.0308sand - 0.6142BD - 0.01566SOC * 1.72)$

925 where  $K_{sm}$  is the  $K_s$  of soil mixtures.  $K_{sat,f}$  is the  $K_s$  of fine minerals and was calculated using PTFs in Table A1. VGF shares the same definition as for Eq. (A8).

#### **BM-Kozeny-Carman equation (BM-KC scheme)**

930 The Kozeny-Carman equation (A17), originally developed to quantitatively describe hydraulic conductivity vs. the mean grain size in capillary flow, was used to estimate  $K_s$  of binary mixtures. The porosity was obtained by using the BM scheme in A.1 section. The representative grain diameter was estimated using the power-averaging method (Eq. (A18)) proposed by Zhang et al. (2011). This method introduced a coefficient (Eq. (A19)) with the critical fraction of gravels taking into account.

$$K_{sm} = \left( \frac{\rho g}{\mu} \right) \left[ \frac{d_m^2 \phi_m^3}{180(1-\phi_m)^2} \right] \quad (A17)$$

935 where  $\phi_m$  has the same definition as in Equation (A7).  $d_m$  is the representative grain diameter of soil mixture.  $\rho$  is the fluid density.  $g$  is gravitational acceleration, and  $\mu$  is the dynamic viscosity.

$$d_m = (VGF * GD^p + VFF * FD^p)^{1/p} \quad (A18)$$

where VGF, VFF, GD and FD have the same definition as in the BM scheme in A.1 section displays.  $p$  is a coefficient that varies sigmoidally from  $-1$  to  $0$  with VGF increasing from  $0$  to  $1$ .  $p$  is estimated empirically by

$$p = \frac{1}{1 + \exp[(\alpha(VGF_c - VGF))]} - 1 \quad (A19)$$

940 where  $VGF_c$  is the critical fraction of gravels and is approximated by  $VGF_c = 1 - \phi_g$  ( $\phi_g$  from Eq. (A9)).  $\alpha$  is a shape factor set at a value of  $20$  as in Zhang et al. (2011).

#### **A.5 Heat capacity and thermal conductivity**

##### **Heat capacity**

945 Soil heat capacity  $C_s$  depends on the heat capacities of all constituents, and is calculated using Eq. (A20) given by De Vries (1963),

$$C_s = \theta C_w + (1 - \theta_s) C_{soil} + (\theta_s - \theta) C_{air} \quad (A20)$$

950 where  $\theta$  and  $\theta_s$  share the same meaning as in Eq. (A11).  $C$  represents the heat capacity ( $\text{MJ m}^{-3} \text{K}^{-1}$ ), and the subscripts 'w', 'soil' and 'air' refer to water, solid soil and air, respectively.  $C_w$ ,  $C_{soil}$  and  $C_{air}$  are taken as  $4.2$ ,  $2.0$  and  $0.001 \text{ MJ m}^{-3} \text{K}^{-1}$ , respectively. If taking SOC impact into consideration,  $C_s$  is calculated as Eq. (A21) shows as follows,

$$C_s = \theta C_w + (1 - \theta_s) * ((1 - V_{soc}) * C_{soil} + V_{soc} * C_{soc}) + (\theta_s - \theta) C_{air} \quad (A21)$$

where  $V_{soc}$  shares the same definition as in Eq. (A4).  $C_{soc}$  is the heat capacity of organic matter and taken as  $2.5 \text{ MJ m}^{-3} \text{K}^{-1}$ .

##### **Thermal conductivity by the De Vries (1963) model revised by Farouki (1981) (D63F)**

955 The De Vries (1963) model was developed from the Maxwell equation for electrical conductivity of a mixture of granular materials dispersed in a continuous fluid (Eucken, 1932). Farouki (1981) set liquid water as the continuous medium and regarded soil minerals as uniform particles. Considering soils as binary mixture of fine minerals and coarse gravels,  $\lambda$  is estimated as follows:

$$\lambda = \frac{x_w \lambda_w + w_a x_a (\lambda_a + \lambda_v) + w_m x_m \lambda_m + w_g x_g \lambda_g + w_{soc} x_{soc} \lambda_{soc}}{x_w + w_a x_a + w_m x_m + w_g x_g + w_{soc} x_{soc}} \quad (A22)$$

960 where  $w$  is the weighting factor,  $x$  is the volume fraction,  $\lambda$  is the thermal conductivity, and the subscripts 'w', 'a', 'v', 'm', 'g' and 'soc' refer to water, air, vapor, fine minerals, gravels and SOC composed of soil, respectively.  $\lambda_w = 0.57 \text{ W m}^{-1} \text{K}^{-1}$ ,  $\lambda_a = 2.0 \text{ W m}^{-1} \text{K}^{-1}$ ,  $\lambda_g = 2.54 \text{ W m}^{-1} \text{K}^{-1}$  and  $\lambda_{soc} = 0.25 \text{ W m}^{-1} \text{K}^{-1}$ .  $\lambda_m$  was calculated using Eq. (A23),

$$\lambda_m = \lambda_q^q \lambda_o^{(1-q)} \quad (\text{A23})$$

965 where  $\lambda_q$  is the thermal conductivity of quartz ( $\lambda_q=7.7 \text{ W m}^{-1} \text{ K}^{-1}$ ).  $\lambda_o$  is the thermal conductivity of other minerals ( $\lambda_o=2.0 \text{ W m}^{-1} \text{ K}^{-1}$ ).  $V_{soc}$  shares the same meaning as for Eq. (A4). In this study,  $q$  is assumed equal to half of the sand fraction ( $q = 1/2\%sand$ ) in terms of Chen et al. (2012)'s research.

$w$  in Eq. (A24) is empirically given by:

$$w_i = \frac{1}{3} \left[ \frac{2}{1 + \left( \frac{\lambda_i}{\lambda_w} - 1 \right) g_a} + \frac{1}{1 + \left( \frac{\lambda_i}{\lambda_w} - 1 \right) (1 - 2g_a)} \right] \quad (\text{A24})$$

970 where  $g_a$  is the shape factor of ellipsoidal particles. A uniform shape factor  $g_a$  of 0.125 is used for fine minerals (Farouki, 1981), a  $g_a$  of 0.33 for gravels and a  $g_a$  of 0.5 for SOC (De Vries, 1963).

For  $\lambda_v$  together with  $g_a$  for air, Farouki (1981) provided the following Eq. (A25).

For  $0.09 \text{ m}^3 \text{ m}^{-3} \leq x_w \leq \phi$ ,

$$\lambda_v = \lambda_v^s \quad \text{and} \quad g_{a(air)} = 0.333 - (0.333 - 0.035)x_a/\phi$$

975 And for  $0 \leq x_w \leq 0.09 \text{ m}^3 \text{ m}^{-3}$ , (A25)

$$\lambda_v = \frac{x_w}{0.09} \lambda_v^s \quad \text{and} \quad g_{a(air)} = 0.013 + 0.944\phi$$

where  $\lambda_v^s$  is the value of  $\lambda_v$  for saturated vapor.  $\phi$  is defined as in Eq. (A2).

#### ***Simplified De Vries-based model (T16)***

980 The T16 scheme (Tian et al., 2016) assumed the negligible effect of vapor movement (i.e.  $\lambda_v = 0$ ) in the De Vries-based model (Eq. (A22)). Soil texture was assumed to be determining the physical properties of soil minerals.  $\lambda$  of fine minerals ( $\lambda_m$ ) and shape parameters for minerals and air were computed using Eq. (A26-A28),

$$\lambda_m = \lambda_{sand}^{\%sand} \lambda_{clay}^{\%clay} \lambda_{silt}^{\%silt} \quad (\text{A26})$$

$$\text{and} \quad g_{a(m)} = g_{a(sand)}\%sand + g_{a(silt)}\%silt + g_{a(clay)}\%clay \quad (\text{A27})$$

985 where  $\lambda_{sand}=7.7 \text{ W m}^{-1} \text{ K}^{-1}$ ,  $g_{a(sand)}=0.782$ ,  $\lambda_{silt}=2.74 \text{ W m}^{-1} \text{ K}^{-1}$ ,  $g_{a(silt)}=0.0534$ ,  $\lambda_{clay}=1.93 \text{ W m}^{-1} \text{ K}^{-1}$ , and  $g_{a(clay)}=0.00775$ .

$g_{a(air)}$  is assumed to vary linearly with air fraction and is estimated using Eq. (A28):

$$g_{a(air)} = 0.333 * (1 - x_a/\phi) \quad (\text{A28})$$

where  $\phi$  is defined as in Eq. (A2).  $x_a$  has the same meaning as in Eq. (A22).

For dry soils,  $\lambda_{dry}$  calculation follows Eq. (A29) proposed by De Vries (1963),

$$990 \quad \lambda_{dry} = 1.25 * \frac{w_a x_a \lambda_a + w_m x_m \lambda_m + w_g x_g \lambda_g + w_{soc} x_{soc} \lambda_{soc}}{w_a x_a + w_m x_m + w_g x_g + w_{soc} x_{soc}} \quad (\text{A29})$$

where parameters share the same definition as in Eq. (A22).

#### ***Johansen model (J75)***

The Johansen (1975) model simulated  $\lambda$  given by a combination of dry and saturated state values, which is weighted by a factor known as the Kersten number as Eq. (A30) depicts,

$$995 \quad \lambda = K_e (\lambda_{sat} - \lambda_{dry}) + \lambda_{dry} \quad (\text{A30})$$

where  $\lambda_{dry}$  and  $\lambda_{sat}$  are the dry and saturated thermal conductivity, respectively.  $K_e$  is the Kersten number, a normalized thermal conductivity that relates to the logarithm of the moisture content (Kersten, 1949) as Eq. (A31) shows,

$$\begin{cases} K_e = \frac{\lambda - \lambda_{dry}}{\lambda_{sat} - \lambda_{dry}} \\ K_e = \log(S_r) + 1.0 \quad \text{for unfrozen fine-grained soils} \\ K_e = 0.7 * \log(S_r) + 1.0 \quad \text{for unfrozen medium and fine sands} \end{cases} \quad (A31)$$

1000 where  $S_r$  is the saturation degree and defined as Eq. (A32),

$$S_r = x_w / \theta_s \quad (A32)$$

where  $x_w$  is the SM ( $\text{cm}^3 \text{cm}^{-3}$ ).  $\theta_s$  is saturated SM ( $\text{cm}^3 \text{cm}^{-3}$ ) and calculated using Eq. (A2).

The saturated thermal conductivity is calculated using Eq. (A33),

$$\lambda_{sat} = \lambda_m^{1-\theta_s} \lambda_w^{\theta_s} \quad (A33)$$

1005 where  $\lambda_m$  has the same definition as in Eq. (A23). If considering the SOC impact,  $\lambda_m$  was calculated using Eq. (A34),

$$\lambda_m = \lambda_q^{q(1-V_{soc})} \lambda_o^{(1-q)(1-V_{soc})} \lambda_{soc}^{V_{soc}} \quad (A34)$$

The thermal conductivity for dry state is given as Eq. (A35):

$$\lambda_{dry} = \frac{0.135\rho_b + 64.7}{2700 - 0.947\rho_b} \quad (A35)$$

1010 where  $\rho_b$  is the dry bulk density ( $\text{g/cm}^3$ ).

#### A.6 Soil water flow and heat transport

The vertical movement of water in the unsaturated zone of the soil matrix obeys the following Richards equation (Richards, 1931) for the volumetric water content  $\theta$ :

$$\frac{\partial \theta}{\partial t} = \frac{\partial}{\partial z} \left( D(\theta) \frac{\partial \theta}{\partial z} - K(\theta) \right) + S_\theta \quad (A36)$$

1015 where  $D(\theta)$  ( $\text{m}^2/\text{s}$ ) and  $K(\theta)$  ( $\text{m/s}$ ) are the hydraulic diffusivity and hydraulic conductivity, respectively, and  $S_\theta$  is a volumetric sink term associated to root uptake ( $\text{m}^3 \text{m}^{-3} \text{s}^{-1}$ ), which depends on the surface energy balance and the root profile.

The soil heat transfer is assumed to obey the following Fourier law of diffusion:

$$C_s \frac{\partial T}{\partial t} = \frac{\partial}{\partial z} \left( \lambda \frac{\partial T}{\partial z} \right) \quad (A37)$$

1020 where  $C_s$  is soil thermal heat capacity ( $\text{J m}^{-3} \text{K}^{-1}$ ),  $\lambda$  is thermal conductivity ( $\text{W m}^{-1} \text{K}^{-1}$ ).  $T$  is soil temperature ( $^\circ\text{C}$ ).

Table A2 Bias and RMSE between simulated porosities with measurements at three climate zones. The unit of listed value is  $\text{cm}^3 \text{cm}^{-3}$ .

| Scheme  | Index | Ngari (arid) |          |          |          | Naqu (semi-arid) |          |          |          |          | Maqu (sub-humid) |          |          |          |          |
|---------|-------|--------------|----------|----------|----------|------------------|----------|----------|----------|----------|------------------|----------|----------|----------|----------|
|         |       | 5<br>cm      | 10<br>cm | 20<br>cm | 40<br>cm | 5<br>cm          | 10<br>cm | 20<br>cm | 40<br>cm | 50<br>cm | 5<br>cm          | 10<br>cm | 20<br>cm | 40<br>cm | 80<br>cm |
| Cosby-S | Bias  | 0.05         | 0.02     | 0.07     | 0.05     | 0.18             | 0.08     | 0.05     | 0.09     | 0.14     | 0.27             | 0.20     | 0.14     | 0.07     | 0.06     |
|         | RMSE  | 0.05         | 0.07     | 0.09     | 0.09     | 0.25             | 0.10     | 0.05     | 0.11     | 0.15     | 0.28             | 0.21     | 0.15     | 0.09     | 0.07     |
| BD      | Bias  | 0.06         | 0.04     | 0.05     | 0.07     | 0.04             | 0.03     | 0.03     | 0.02     | 0.04     | 0.02             | 0.03     | 0.07     | 0.06     | 0.05     |
|         | RMSE  | 0.06         | 0.04     | 0.05     | 0.07     | 0.05             | 0.03     | 0.04     | 0.02     | 0.04     | 0.03             | 0.05     | 0.08     | 0.06     | 0.06     |
| SocVg   | Bias  | 0.1          | 0.07     | 0.09     | 0.11     | 0.14             | 0.15     | 0.08     | 0.16     | 0.20     | 0.04             | 0.06     | 0.07     | 0.08     | 0.08     |

|    |      |      |      |      |      |      |      |      |      |      |      |      |      |      |      |
|----|------|------|------|------|------|------|------|------|------|------|------|------|------|------|------|
|    | RMSE | 0.11 | 0.1  | 0.09 | 0.15 | 0.17 | 0.16 | 0.09 | 0.17 | 0.21 | 0.05 | 0.08 | 0.09 | 0.09 | 0.10 |
|    | Bias | 0.03 | 0.06 | 0.06 | 0.07 | 0.06 | 0.13 | 0.07 | 0.05 | 0.05 |      |      |      |      |      |
| BM | RMSE | 0.03 | 0.06 | 0.06 | 0.07 | 0.07 | 0.15 | 0.08 | 0.06 | 0.06 |      |      |      |      |      |

1025

Table A3-1 Estimated parameters of CH model by using PTFs over the three climate zones of the TP. It is to note that  $\theta_s$  aligned with each PTFs were estimated by their own original porosity estimate.  $\theta_s$  listed in the last line is calculated from *in situ* BD measurement.

| PTFs                                                          | Parameter                                      | Ngari (arid) |       |       |       |      | Naqu (semi-arid) |       |       |       |      | Maqu (sub-humid) |       |       |       |  |
|---------------------------------------------------------------|------------------------------------------------|--------------|-------|-------|-------|------|------------------|-------|-------|-------|------|------------------|-------|-------|-------|--|
|                                                               |                                                | 5 cm         | 10 cm | 20 cm | 40 cm | 5 cm | 10 cm            | 20 cm | 40 cm | 50 cm | 5 cm | 10 cm            | 20 cm | 40 cm | 80 cm |  |
| Cosby et al., 1984                                            | $\lambda(-)$                                   | 0.30         | 0.30  | 0.29  | 0.30  | 0.28 | 0.2              | 9     | 0.27  | 0.26  | 0.26 | 0.22             | 0.22  | 0.22  | 0.23  |  |
|                                                               | $\psi$ (cm)                                    | -6.22        | -     | -     | -     | -    | 7.2              | -     | -     | -     | 10.9 | 35.3             | 33.9  | 33.5  | 29.4  |  |
|                                                               | $\theta_s$ (cm <sup>3</sup> cm <sup>-3</sup> ) | 0.38         | 0.38  | 0.39  | 0.39  | 0.39 | 0.3              | 3     | 8.84  | 8.18  | 7    | 0                | 2     | 5     | 6     |  |
|                                                               | $\lambda(-)$                                   | 0.30         | 0.31  | 0.29  | 0.30  | 0.28 | 0.2              | 9     | 0.27  | 0.26  | 0.26 | 0.22             | 0.22  | 0.22  | 0.23  |  |
| Cosby et al., 1984                                            | $\psi$ (cm)                                    | -6.77        | 6.43  | 10.1  | 8     | 9.86 | 8.0              | -     | -     | 12.4  | 51.0 | 48.7             | 47.9  | 43.6  | 41.1  |  |
|                                                               | $\theta_s$ (cm <sup>3</sup> cm <sup>-3</sup> ) | 0.38         | 0.38  | 0.39  | 0.39  | 0.39 | 0.3              | 5     | 9.95  | 8.94  | 9    | 0                | 4     | 9     | 5     |  |
|                                                               | $\lambda(-)$                                   | 0.26         | 0.27  | 0.26  | 0.27  | 0.24 | 0.2              | 5     | 0.24  | 0.23  | 0.24 | 0.28             | 0.27  | 0.27  | 0.27  |  |
|                                                               | $\psi$ (cm)                                    | 164.28       | 10.6  | 14.6  | 18.5  | 10.2 | 9.9              | 10.4  | -     | 13.2  | 59.9 | 55.7             | 55.0  | 50.3  | 50.6  |  |
| Saxton et al., 1986                                           | $\theta_s$ (cm <sup>3</sup> cm <sup>-3</sup> ) | 0.31         | 0.31  | 0.34  | 0.32  | 0.35 | 0.3              | 4     | 0.37  | 0.37  | 0.37 | 0.44             | 0.44  | 0.44  | 0.43  |  |
|                                                               | $\lambda(-)$                                   | 0.44         | 0.47  | 0.40  | 0.43  | 0.36 | 0.4              | 1     | 0.34  | 0.33  | 0.34 | 0.17             | 0.17  | 0.17  | 0.19  |  |
|                                                               | $\psi$ (cm)                                    | 10.1         | -     | 12.2  | 12.8  | -    | 7.2              | -     | 15.2  | 19.0  | -    | -                | 17.6  | 28.0  | 37.9  |  |
|                                                               | $\theta_s$ (cm <sup>3</sup> cm <sup>-3</sup> ) | 0.41         | 0.38  | 0.39  | 0.41  | 0.62 | 0.4              | 6     | 9.94  | 1     | 3    | 3.42             | 7.63  | 8     | 2     |  |
| Campbell and Shiosawa, 1992                                   | $\lambda(-)$                                   | 0.32         | 0.45  | 0.42  | 0.40  | 0.20 | 0.2              | 0     | 0.25  | 0.26  | 0.30 | 0.26             | 0.27  | 0.27  | 0.31  |  |
|                                                               | $\psi$ (cm)                                    | -2.60        | 7.02  | 11.4  | 12.6  | -    | 1.7              | -     | -     | -     | 20.4 | 21.8             | 29.3  | 37.8  | 44.3  |  |
|                                                               | $\theta_s$ (cm <sup>3</sup> cm <sup>-3</sup> ) | 0.43         | 0.43  | 0.42  | 0.43  | 0.65 | 0.6              | 3     | 3.91  | 2.87  | 8.49 | 6                | 3     | 9     | 7     |  |
|                                                               | $\lambda(-)$                                   | 0.32         | 0.45  | 0.42  | 0.40  | 0.20 | 0.2              | 0     | 0.25  | 0.26  | 0.30 | 0.26             | 0.27  | 0.27  | 0.31  |  |
| Saxton et al., 2006                                           | $\psi$ (cm)                                    | -2.60        | 7.02  | 11.4  | 12.6  | -    | 1.7              | -     | -     | -     | 20.4 | 21.8             | 29.3  | 37.8  | 44.3  |  |
|                                                               | $\theta_s$ (cm <sup>3</sup> cm <sup>-3</sup> ) | 0.43         | 0.43  | 0.42  | 0.43  | 0.65 | 0.6              | 3     | 0.46  | 0.44  | 0.47 | 1.00             | 0.85  | 0.69  | 0.53  |  |
|                                                               | $\lambda(-)$                                   | 0.32         | 0.45  | 0.42  | 0.40  | 0.20 | 0.2              | 0     | 0.25  | 0.26  | 0.30 | 0.26             | 0.27  | 0.27  | 0.31  |  |
|                                                               | $\psi$ (cm)                                    | -2.60        | 7.02  | 11.4  | 12.6  | -    | 1.7              | -     | -     | -     | 20.4 | 21.8             | 29.3  | 37.8  | 44.3  |  |
| $\theta_s$ from BD scheme (cm <sup>3</sup> cm <sup>-3</sup> ) |                                                | 0.41         | 0.38  | 0.39  | 0.41  | 0.62 | 0.4              | 6     | 0.38  | 0.29  | 0.20 | 0.71             | 0.64  | 0.54  | 0.47  |  |

1030

Table A3-2 Estimated parameters of VG model by using PTFs over the three climate zones of the TP. It is to note that  $\theta_s$  aligned with each PTFs were estimated by their own original porosity estimate.  $\theta_s$  listed in the last line is calculated from *in situ* BD measurement.

| PTFs                         | Paramete<br>rs                                    | Ngari (arid) |          |          |          |         | Naqu (semi-arid) |          |          |          |         | Maqu (sub-humid) |          |          |          |  |
|------------------------------|---------------------------------------------------|--------------|----------|----------|----------|---------|------------------|----------|----------|----------|---------|------------------|----------|----------|----------|--|
|                              |                                                   | 5<br>cm      | 10<br>cm | 20<br>cm | 40<br>cm | 5<br>cm | 10<br>cm         | 20<br>cm | 40<br>cm | 50<br>cm | 5<br>cm | 10<br>cm         | 20<br>cm | 40<br>cm | 80<br>cm |  |
| Rawls and<br>Brakensiek 1985 | $\theta_r$ (cm <sup>3</sup><br>cm <sup>-3</sup> ) | 0.0          |          |          |          | 0.0     |                  |          |          |          | 0.0     |                  |          |          |          |  |
|                              |                                                   | 4            | 0.04     | 0.05     | 0.04     | 3       | 0.04             | 0.05     | 0.05     | 0.06     | 4       | 0.04             | 0.05     | 0.05     | 0.05     |  |
|                              | $\theta_s$ (cm <sup>3</sup><br>cm <sup>-3</sup> ) | 0.4          |          |          |          | 0.6     |                  |          |          |          | 0.7     |                  |          |          |          |  |
|                              |                                                   | 1            | 0.38     | 0.39     | 0.41     | 2       | 0.46             | 0.38     | 0.29     | 0.2      | 1       | 0.64             | 0.54     | 0.47     | 0.44     |  |
|                              |                                                   | 0.1          |          |          |          | 0.1     |                  |          |          |          | 0.0     |                  |          |          |          |  |
|                              | a (cm <sup>-1</sup> )                             | 1            | 0.1      | 0.08     | 0.09     | 3       | 0.14             | 0.1      | 0.06     | 0.04     | 6       | 0.06             | 0.04     | 0.03     | 0.03     |  |

|                                                               |                                                               |     |      |      |      |     |      |      |      |      |     |      |      |      |      |
|---------------------------------------------------------------|---------------------------------------------------------------|-----|------|------|------|-----|------|------|------|------|-----|------|------|------|------|
| Wösten et al., (Class PTF)                                    | n (-)                                                         | 2.1 |      |      |      | 2.0 |      |      |      |      | 1.4 |      |      |      |      |
|                                                               | $\theta_r$ (cm <sup>3</sup> cm <sup>-3</sup> )                | 6   | 2.21 | 2.01 | 2.03 | 7   | 2.31 | 2.18 | 2.07 | 2.1  | 5   | 1.48 | 1.48 | 1.5  | 1.55 |
|                                                               | $\theta_s$ (cm <sup>3</sup> cm <sup>-3</sup> )                | 0.0 |      |      |      | 0.0 |      |      |      |      | 0.0 |      |      |      |      |
|                                                               | $\theta_s$ (cm <sup>3</sup> cm <sup>-3</sup> )                | 3   | 0.03 | 0.03 | 0.03 | 1   | 0.01 | 0.01 | 0.01 | 0.01 | 3   | 0.03 | 0.03 | 0.03 | 0.03 |
|                                                               | a (cm <sup>-1</sup> )                                         | 0.4 | 0.4  | 0.4  | 0.37 | 0.4 | 0.44 | 0.44 | 0.39 | 0.39 | 0.4 | 0.4  | 0.4  | 0.37 | 0.37 |
| Vereecken et al., 1989                                        | n (-)                                                         | 0.0 |      |      |      | 0.0 |      |      |      |      | 0.0 |      |      |      |      |
|                                                               | $\theta_r$ (cm <sup>3</sup> cm <sup>-3</sup> )                | 4   | 0.04 | 0.04 | 0.04 | 3   | 0.03 | 0.03 | 0.02 | 0.02 | 4   | 0.04 | 0.04 | 0.04 | 0.04 |
|                                                               | $\theta_s$ (cm <sup>3</sup> cm <sup>-3</sup> )                | 1.3 |      |      |      | 1.1 |      |      |      |      | 1.3 |      |      |      |      |
|                                                               | $\theta_s$ (cm <sup>3</sup> cm <sup>-3</sup> )                | 8   | 1.38 | 1.38 | 1.52 | 8   | 1.18 | 1.18 | 1.17 | 1.17 | 8   | 1.38 | 1.38 | 1.52 | 1.52 |
|                                                               | a (cm <sup>-1</sup> )                                         | 0.0 |      |      |      | 0.1 |      |      |      |      | 0.2 |      |      |      |      |
| Wösten et al., 1999                                           | n (-)                                                         | 4   | 0.03 | 0.04 | 0.04 | 2   | 0.08 | 0.05 | 0.04 | 0.04 | 1   | 0.16 | 0.13 | 0.1  | 0.09 |
|                                                               | $\theta_r$ (cm <sup>3</sup> cm <sup>-3</sup> )                | 0.3 |      |      |      | 0.5 |      |      |      |      | 0.6 |      |      |      |      |
|                                                               | $\theta_s$ (cm <sup>3</sup> cm <sup>-3</sup> )                | 7   | 0.35 | 0.37 | 0.37 | 6   | 0.41 | 0.35 | 0.28 | 0.22 | 1   | 0.55 | 0.47 | 0.42 | 0.4  |
|                                                               | $\theta_s$ (cm <sup>3</sup> cm <sup>-3</sup> )                | 0.3 |      |      |      | 0.1 |      |      |      |      | 0.0 |      |      |      |      |
|                                                               | a (cm <sup>-1</sup> )                                         | 2   | 0.34 | 0.18 | 0.25 | 6   | 0.35 | 0.25 | 0.19 | 0.28 | 1   | 0.01 | 0.01 | 0.01 | 0.02 |
| Rosetta1-H3                                                   | n (-)                                                         | 1.3 |      |      |      | 1.2 |      |      |      |      | 0.8 |      |      |      |      |
|                                                               | $\theta_r$ (cm <sup>3</sup> cm <sup>-3</sup> )                | 8   | 1.45 | 1.22 | 1.27 | 5   | 1.49 | 1.41 | 1.31 | 1.37 | 2   | 0.83 | 0.82 | 0.82 | 0.85 |
|                                                               | $\theta_s$ (cm <sup>3</sup> cm <sup>-3</sup> )                | 0   | 0    | 0    | 0    | 0   | 0    | 0    | 0    | 0    | 0   | 0    | 0    | 0    | 0    |
|                                                               | $\theta_s$ (cm <sup>3</sup> cm <sup>-3</sup> )                | 0.5 |      |      |      | 0.5 |      |      |      |      | 0.6 |      |      |      |      |
|                                                               | a (cm <sup>-1</sup> )                                         | 5   | 0.36 | 0.37 | 0.38 | 7   | 0.41 | 0.35 | 0.28 | 0.21 | 4   | 0.57 | 0.48 | 0.42 | 0.4  |
| Rosetta1-H3                                                   | n (-)                                                         | 0.0 |      |      |      | 0.0 |      |      |      |      | 0.2 | 0.09 | 0.03 | 0.02 | 0.02 |
|                                                               | $\theta_r$ (cm <sup>3</sup> cm <sup>-3</sup> )                | 6   | 0.05 | 0.05 | 0.04 | 4   | 0.05 | 0.06 | 0.03 | 0.02 | 1.1 |      |      |      |      |
|                                                               | $\theta_s$ (cm <sup>3</sup> cm <sup>-3</sup> )                | 1.4 |      |      |      | 1.1 |      |      |      |      | 3   | 1.16 | 1.19 | 1.25 | 1.28 |
|                                                               | $\theta_s$ (cm <sup>3</sup> cm <sup>-3</sup> )                | 8   | 1.46 | 1.4  | 1.44 | 9   | 1.35 | 1.39 | 1.3  | 1.2  | 0.0 |      |      |      |      |
|                                                               | a (cm <sup>-1</sup> )                                         | 0.0 |      |      |      | 0.0 |      |      |      |      | 7   | 0.07 | 0.05 | 0.05 | 0.04 |
| Rosetta1-H3                                                   | n (-)                                                         | 4   | 0.03 | 0.04 | 0.04 | 4   | 0.05 | 0.04 | 0.04 | 0.04 | 0.5 |      |      |      |      |
|                                                               | $\theta_r$ (cm <sup>3</sup> cm <sup>-3</sup> )                | 0.3 |      |      |      | 0.4 |      |      |      |      | 5   | 0.51 | 0.43 | 0.38 | 0.37 |
|                                                               | $\theta_s$ (cm <sup>3</sup> cm <sup>-3</sup> )                | 6   | 0.35 | 0.34 | 0.35 | 6   | 0.41 | 0.34 | 0.31 | 0.29 | 0   | 0.01 | 0.01 | 0.01 | 0.01 |
|                                                               | $\theta_s$ (cm <sup>3</sup> cm <sup>-3</sup> )                | 0.0 |      |      |      | 0.0 |      |      |      |      | 1.7 |      |      |      |      |
|                                                               | a (cm <sup>-1</sup> )                                         | 4   | 0.04 | 0.03 | 0.03 | 4   | 0.04 | 0.04 | 0.05 | 0.04 | 3   | 1.7  | 1.67 | 1.61 | 1.54 |
| $\theta_s$ from BD scheme (cm <sup>3</sup> cm <sup>-3</sup> ) | n (-)                                                         | 2.2 |      |      |      | 1.8 |      |      |      |      | 0.7 |      |      |      |      |
|                                                               | $\theta_s$ from BD scheme (cm <sup>3</sup> cm <sup>-3</sup> ) | 6   | 2.3  | 1.95 | 2.07 | 4   | 2.41 | 2.13 | 1.84 | 2.45 | 1   | 0.64 | 0.54 | 0.47 | 0.44 |

1035 **Table A4 Biases of estimated SWRCs from PTFs combined with the BD scheme and the measurements at 5 cm at three climate zones.**

| PTFs                        | Ngari (arid)                                      | Naqu (semi-arid)                                  | Maqu (sub-humid)                                  |
|-----------------------------|---------------------------------------------------|---------------------------------------------------|---------------------------------------------------|
|                             | Absolute Bias (cm <sup>3</sup> cm <sup>-3</sup> ) | Absolute Bias (cm <sup>3</sup> cm <sup>-3</sup> ) | Absolute Bias (cm <sup>3</sup> cm <sup>-3</sup> ) |
| Cosby et al., 1984          | 0.03                                              | 0.09                                              | 0.15                                              |
| Cosby et al., 1984          | 0.04                                              | 0.09                                              | 0.12                                              |
| Saxton et al., 1986         | 0.15                                              | 0.08                                              | 0.12                                              |
| Campbell and Shiosawa, 1992 | 0.06                                              | 0.11                                              | 0.17                                              |
| Saxton et al., 2006         | 0.05                                              | 0.10                                              | 0.18                                              |
| Rawls and Brakensiek 1985   | 0.06                                              | 0.16                                              | 0.30                                              |
| Wösten et al., (Class PTF)  | 0.05                                              | 0.04                                              | 0.29                                              |
| Vereecken et al., 1989      | 0.01                                              | 0.10                                              | 0.38                                              |
| Wösten et al., 1999         | 0.05                                              | 0.07                                              | 0.22                                              |
| Rosetta1-H3                 | 0.06                                              | 0.14                                              | 0.20                                              |
| Rosetta3-H3                 | 0.06                                              | 0.12                                              | 0.16                                              |
| Weynants et al. 2009        | 0.06                                              | 0.07                                              | 0.17                                              |

**Table A5 Biases of  $C_s$  between estimates, based on the De Vries (1963) model across the three climate zones, and the measurements. Upper part of the table lists the bias derived from estimations without considering SOC impact, and lower part of the table for biases from estimations with taking SOC impact into account in the Maqu and Naqu regions. The unit of listed value is  $\text{MJ m}^{-3} \text{K}^{-1}$ .**

| Region                | 5 cm  | 10 cm | 20 cm | 40 cm | 50 cm | 80 cm |
|-----------------------|-------|-------|-------|-------|-------|-------|
| Ngari (arid)          | -0.04 | 0.01  | -0.05 | 0.00  |       |       |
| Naqu (semi-arid)      | -0.29 | 0.00  | 0.22  | 0.31  | 0.14  |       |
| Maqu (sub-humid)      | -0.10 | -0.02 | 0.00  | 0.10  |       | 0.13  |
| Naqu (semi-arid) +SOC | -0.22 | 0.11  | 0.26  | 0.33  | 0.15  |       |
| Maqu (sub-humid) +SOC | 0.00  | 0.08  | 0.10  | 0.16  |       | 0.19  |

**Table A6 Comparisons of the mean derived FC and PWP from SWRCs-CH and SWRCs-VG models based on various soil datasets, with the laboratory measurements. FC represents field capacity, and PWP denotes permanent wilting point.**

| Region           | Parameters                           | Measured | Tibet-Obs | FAO-UNESCO | HWSD | BNU  | SoilGrid1km | SoilGrid250m |
|------------------|--------------------------------------|----------|-----------|------------|------|------|-------------|--------------|
| Ngari (arid)     | FC ( $\text{cm}^3 \text{cm}^{-3}$ )  | 0.20     | 0.26      | 0.46       | 0.43 | 0.46 | 0.37        | 0.41         |
|                  | PWP ( $\text{cm}^3 \text{cm}^{-3}$ ) | 0.10     | 0.08      | 0.26       | 0.21 | 0.22 | 0.16        | 0.18         |
| Naqu (semi-arid) | FC ( $\text{cm}^3 \text{cm}^{-3}$ )  | 0.28     | 0.27      | 0.44       | 0.41 | 0.44 | 0.44        | 0.45         |
|                  | PWP ( $\text{cm}^3 \text{cm}^{-3}$ ) | 0.18     | 0.10      | 0.26       | 0.20 | 0.20 | 0.21        | 0.22         |
| Maqu (sub-humid) | FC ( $\text{cm}^3 \text{cm}^{-3}$ )  | 0.68     | 0.56      | 0.44       | 0.41 | 0.46 | 0.51        | 0.48         |
|                  | PWP ( $\text{cm}^3 \text{cm}^{-3}$ ) | 0.26     | 0.24      | 0.26       | 0.21 | 0.23 | 0.27        | 0.26         |



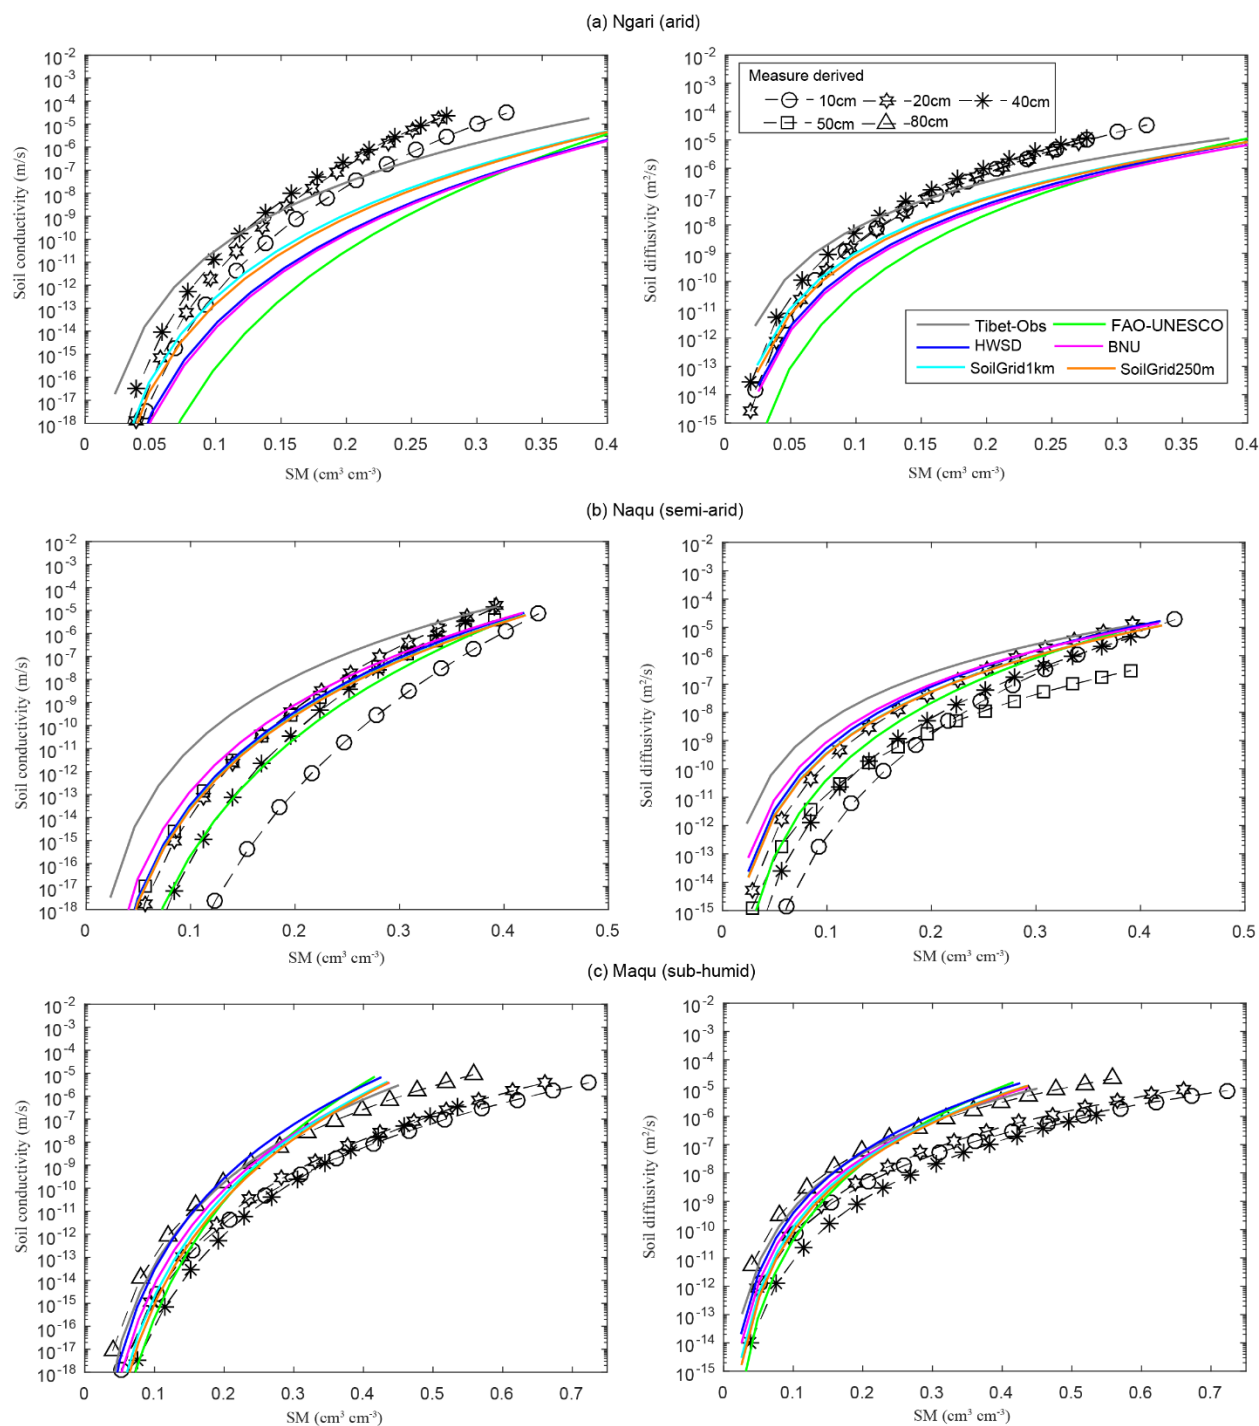

**Figure A1** Comparisons of derived soil conductivity ( $K$ ) and soil diffusivity ( $D$ ) by the CH model based on six soil datasets, with those derived from the laboratory measurements. Given the relatively homogenous soil profile derived from existing datasets (see Fig. 12 in the text), the averaged  $K$  and  $D$  derived from existing datasets over different depths were illustrated.

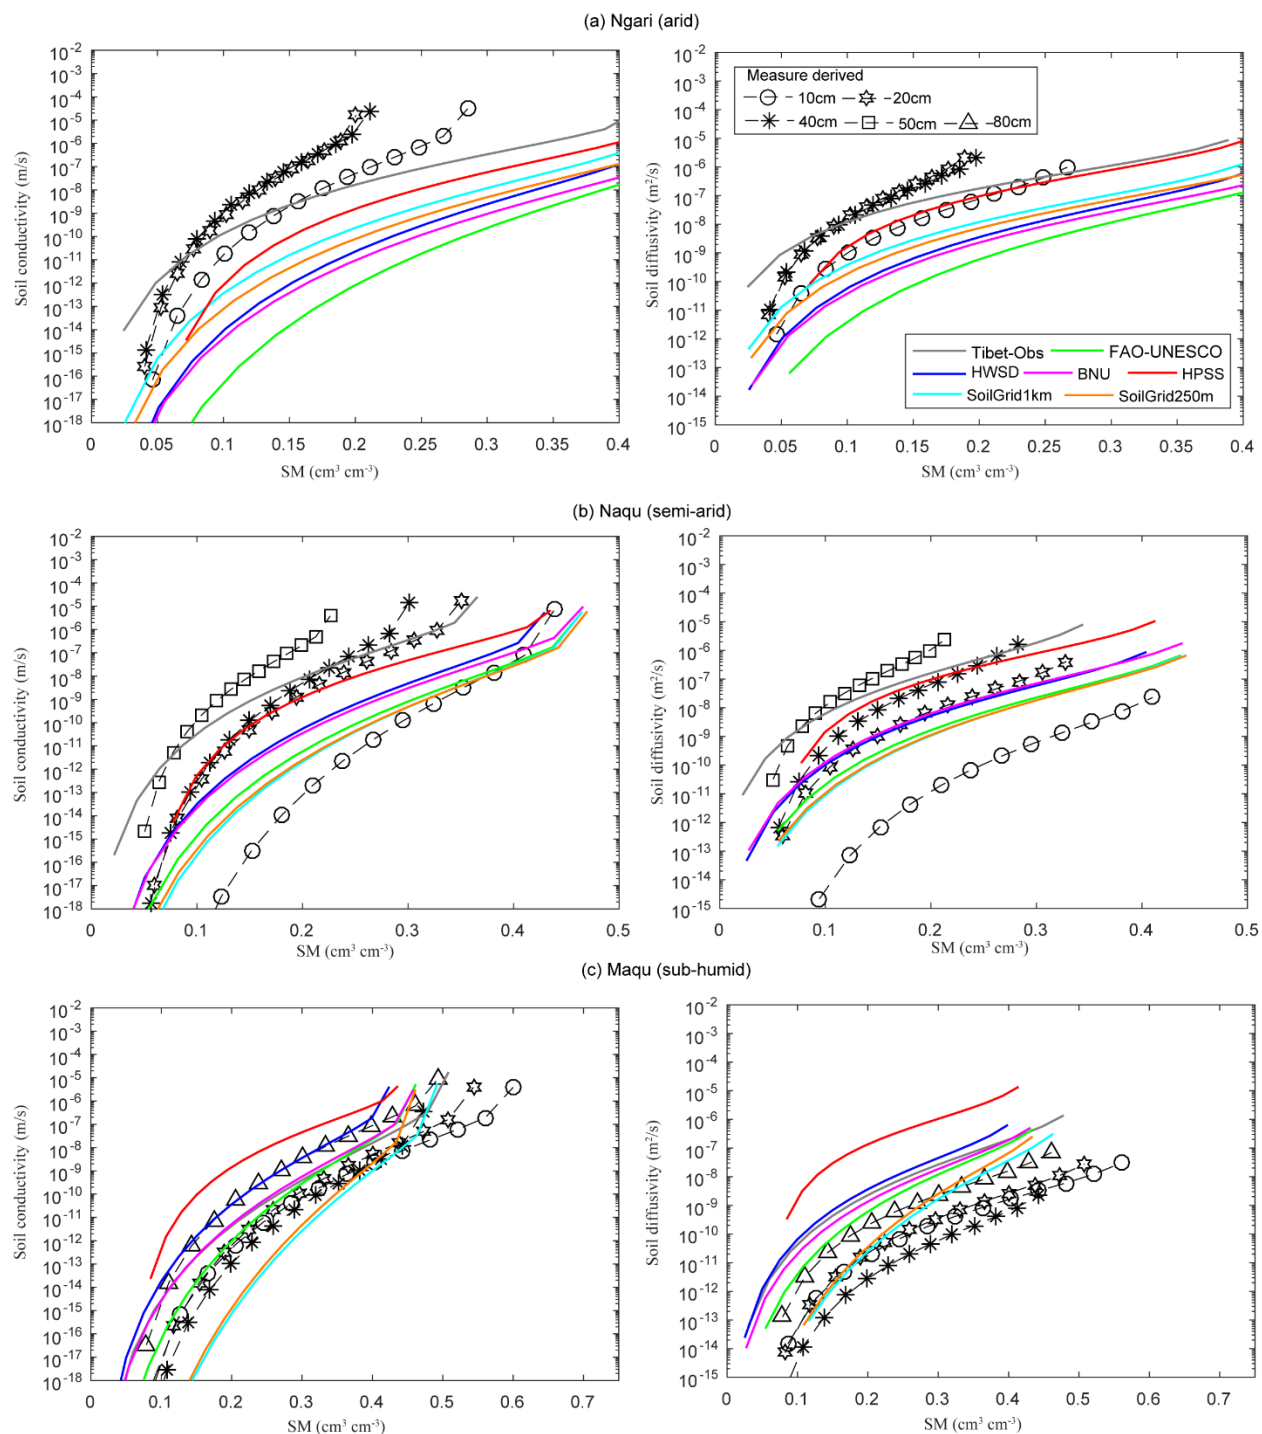

**Figure A2** Comparisons of derived soil conductivity ( $K$ ) and soil diffusivity ( $D$ ) by the VG model based on seven soil datasets, with those derived from the laboratory measurements. Given the relatively homogenous soil profile derived from existing datasets (see Fig. 12 in the text), the averaged  $K$  and  $D$  derived from existing datasets over different depths were illustrated. It is to note that HPSS only provides hydraulic parameters for the VG model.

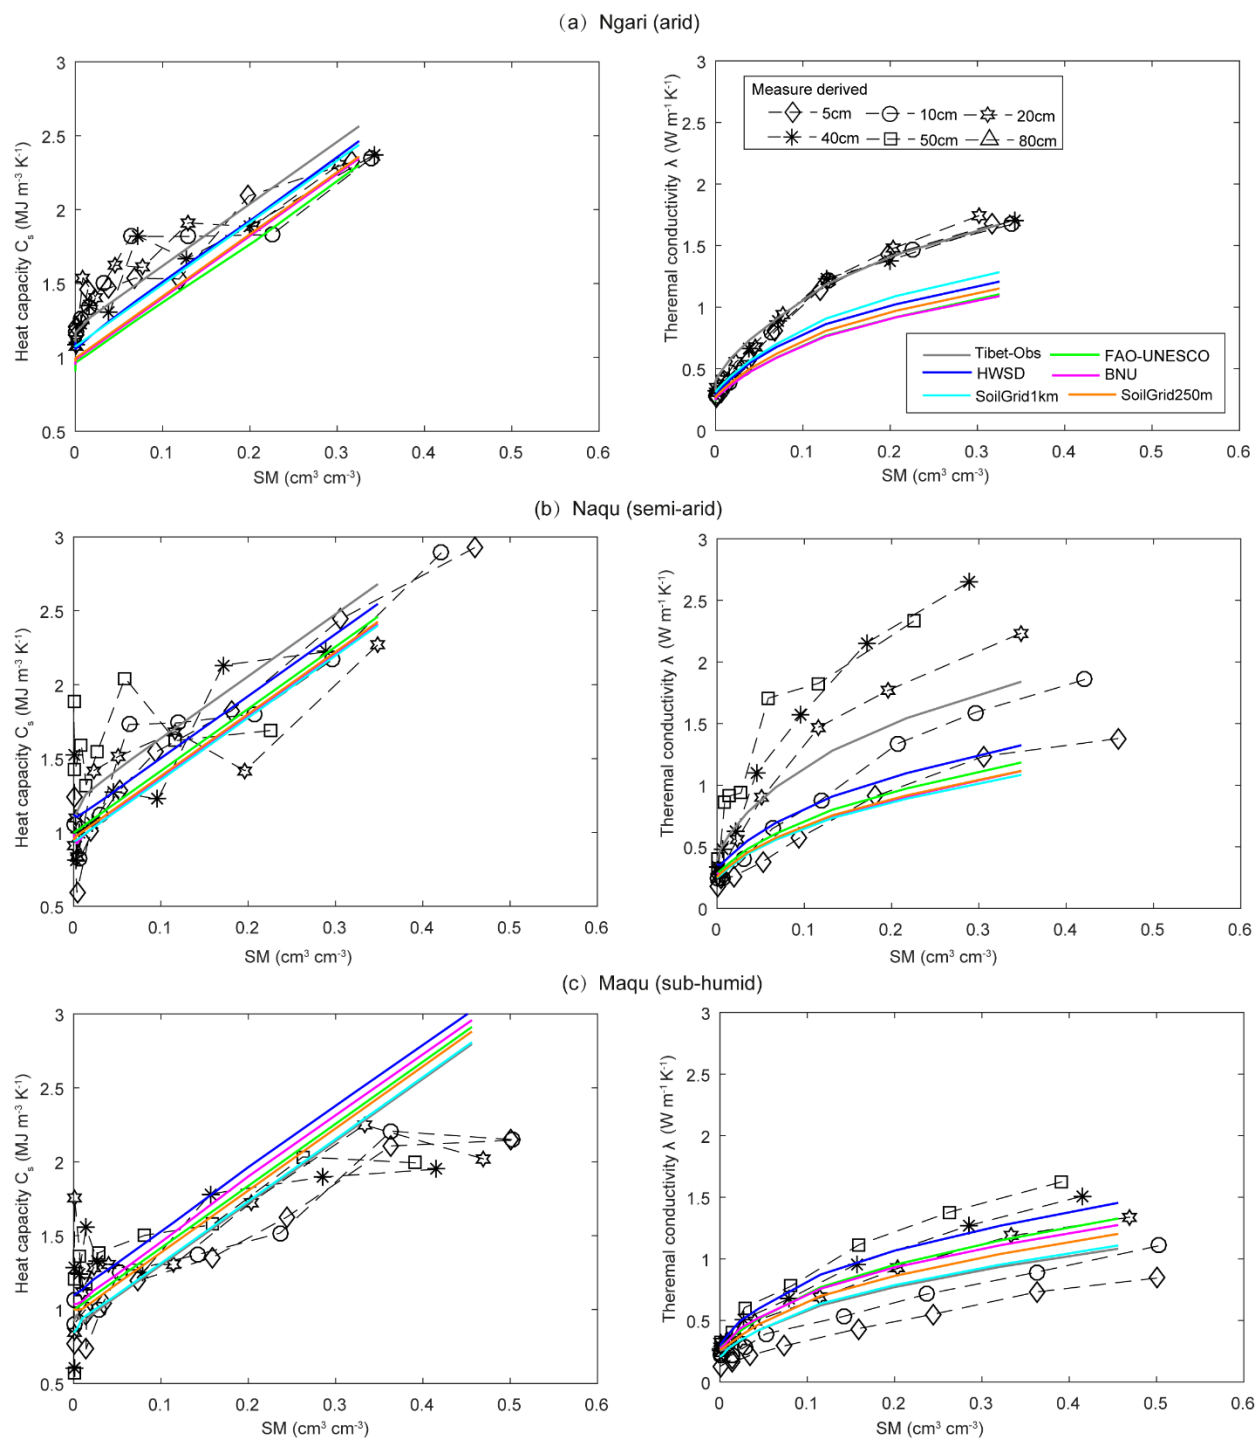

**Figure A3 Comparisons of derived  $C_s$ -SM (left panel) and  $\lambda$ -SM (right-panel) by the D63F model based on various datasets, with the measurements. Given the relatively homogenous soil profile derived from existing datasets (see Fig. 12 in the text), the averaged  $C_s$ -SM and  $\lambda$ -SM derived from existing datasets over different depths were illustrated.**
